# Supplementary material for: Amine-tethered phenylboronic acid-enabling ring-opening strategy for carbon chain elongation from double aldol cyclic hemiacetals
Source: Royal Society of Chemistry journal article supplement (doi:10.1039/c9ob01263j), 2019-01-01

## Supplementary Information

### **Amine-Tethered Phenylboronic Acid-Enabling Ring-Opening Strategy for Carbon Chain Elongation from Double Aldol Cyclic Hemiacetals**

Yamato Kanzaki, ‡<sup>a</sup> Yuki Hirao, ‡<sup>a</sup> Harunobu Mitsunuma, \*<sup>a</sup> and Motomu Kanai \*<sup>a</sup>

<sup>a</sup>Graduate School of Pharmaceutical Sciences, The University of Tokyo, Hongo, Bunkyo-ku, Tokyo  
113-0033, Japan.

## Table of Contents

Materials and Methods

Experimental Data

A Representative Procedure of Ring-Opening Reaction

A Representative Procedure for Synthesis of Cyclic Hemiacetal

Effects of Stereochemistry of Cyclic Hemiacetal on the Ring-Opening Reaction

Synthesis of Boronic acids

Synthesis of Cyclic Hemiacetals

Ring-Opening Reaction of **2a**

Representative transformations of ring-opened aldehyde **6ag**

Control Experiments of Transformation of Ring-Opened Aldehyde **6ag**

References

NMR Data

## Materials and Methods

Reactions were carried out under argon atmosphere unless otherwise noted. Purified compounds were further dried under high vacuum. Diastereoselectivity of the products was determined by  $^1\text{H}$  NMR analysis or LC/MS analysis of the crude mixture, comparing authentic samples. Yields refer to the diastereo mixture of compounds. Thin layer chromatography (TLC) was performed using EMD TLC plates pre-coated with 254  $\mu\text{m}$  thickness silica gel 60 F<sub>254</sub> plates and visualized by fluorescence quenching under UV light and *p*-anisaldehyde stains. Flash chromatography was performed using silica gel 60 (230-400 mesh ASTM) or silica gel 60N (40-100  $\mu\text{m}$ ) purchased from Merck or Kanto chemical, respectively. NMR spectra were recorded on either a JEOL ECX 500 spectrometer operating at 500 MHz and 125 MHz for  $^1\text{H}$  and  $^{13}\text{C}$  acquisitions, respectively, or a JEOL ECS 400 spectrometer operating at 400 MHz, 125 MHz and 100 MHz for  $^1\text{H}$ ,  $^{11}\text{B}$  and  $^{13}\text{C}$  acquisitions, respectively. Chemical shifts are reported in ppm with the solvent resonance as the internal standard ( $^1\text{H}$ :  $\text{CDCl}_3$ ,  $\delta$  7.26;  $\text{CD}_3\text{OD}$ ,  $\delta$  3.31;  $(\text{CD}_3)_2\text{CO}$ ,  $\delta$  2.05), ( $^{13}\text{C}$ :  $\text{CDCl}_3$ ,  $\delta$  77.16;  $\text{CD}_3\text{OD}$ ,  $\delta$  49.00;  $(\text{CD}_3)_2\text{CO}$ ,  $\delta$  29.84). Data is reported as follows: s = singlet, br = broad, d = doublet, t = triplet, q = quartet, m = multiplet; coupling constants in Hz; integration. All deuterated solvents were purchased from Kanto chemical or Sigma-Aldrich. IR spectra were measured on a JASCO FT/IR 410 spectrophotometer. High-resolution mass spectra were obtained using a JEOL JMS-T100LC AccuTOF spectrometer. LC/MS data were obtained using a Shimadzu Prominence-*i*LC-2030/LCMS-2020. Preparative HPLC was performed on a Shimadzu SPD-20A/CTO-20AC using 2 cm  $\times$  25cm Daicel Chiralpak IA. Optical rotations were measured on a JASCO P-1010 polarimeter.

MesCu was either purchased from Strem or synthesized according to the literature.<sup>1</sup> DTBM-segphos was donated by Takasago International Corporation. Liquid aldehydes,  $\text{Et}_3\text{N}$  and Triisopropyl borate were purified by distillation. All the other chemicals were used as received. THF was deoxidized, stabilizer-free, and organic synthesis grade; acetone was super dehydrated, organic synthesis grade; toluene was JIS special grade. These solvents were purchased from Wako Pure Chemical Industries and used as received without further purification. Compound **2e** was prepared according to the literature.<sup>2</sup>

## Experimental Data

### A Representative Procedure of Ring-Opening Reaction

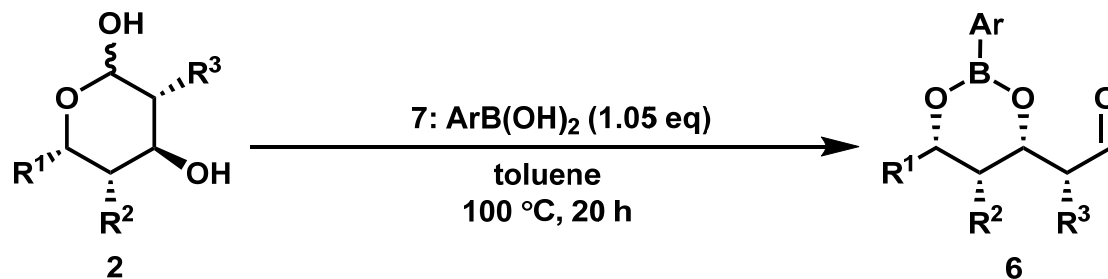

Cyclic hemiacetal **2** (0.1 mmol) and boronic acid **7** (0.105 mmol) were added to a test tube, followed by the addition of toluene (2 mL) at 23 °C. After stirred for 20 hours at 100 °C, the solvent was evaporated.

Deuterated chloroform was added to this crude mixture, followed by the addition of 1,1,2,2-tetrachloroethane as internal standard. The solution was transferred to an NMR tube. The yield was determined by  $^1\text{H}$ -NMR taken at room temperature.

### A Representative Procedure for Synthesis of Cyclic Hemiacetal

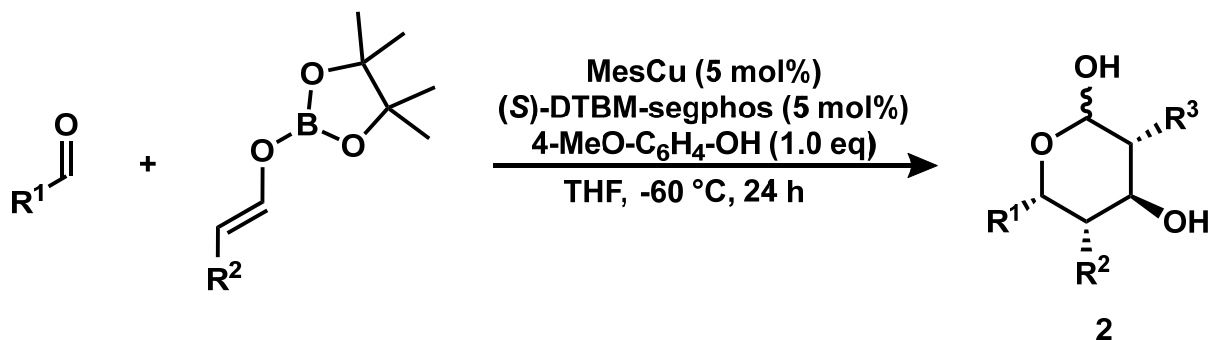

Under an argon atmosphere, mesitylcopper (1.8 mg, 0.01 mmol) and  $(S)$ -DTBM-segphos (11.8 mg, 0.01 mmol) were added to a round-bottom flask, followed by the addition of THF (0.4 mL) and 4-MeO- $\text{C}_6\text{H}_4\text{-OH}$  (24.8 mg, 0.2 mmol) at  $23\text{ }^\circ\text{C}$ . After cooled to  $-60\text{ }^\circ\text{C}$ , aldehyde (0.2 mmol) and a solution of boron enolate (0.8 mmol) in THF (0.8 mL), prepared according to the literature<sup>3</sup>, were added, and the mixture was stirred for 24 hours at  $-60\text{ }^\circ\text{C}$ . Water was added, and the mixture was allowed to warm up to room temperature. The organic layer was separated, and the aqueous phase was extracted with EtOAc. The combined organic layers were washed with brine, dried over  $\text{Na}_2\text{SO}_4$ . After evaporation, the residue was purified by column chromatography on silica gel.

## Effects of Stereochemistry of Cyclic Hemiacetal on the Ring-Opening Reaction

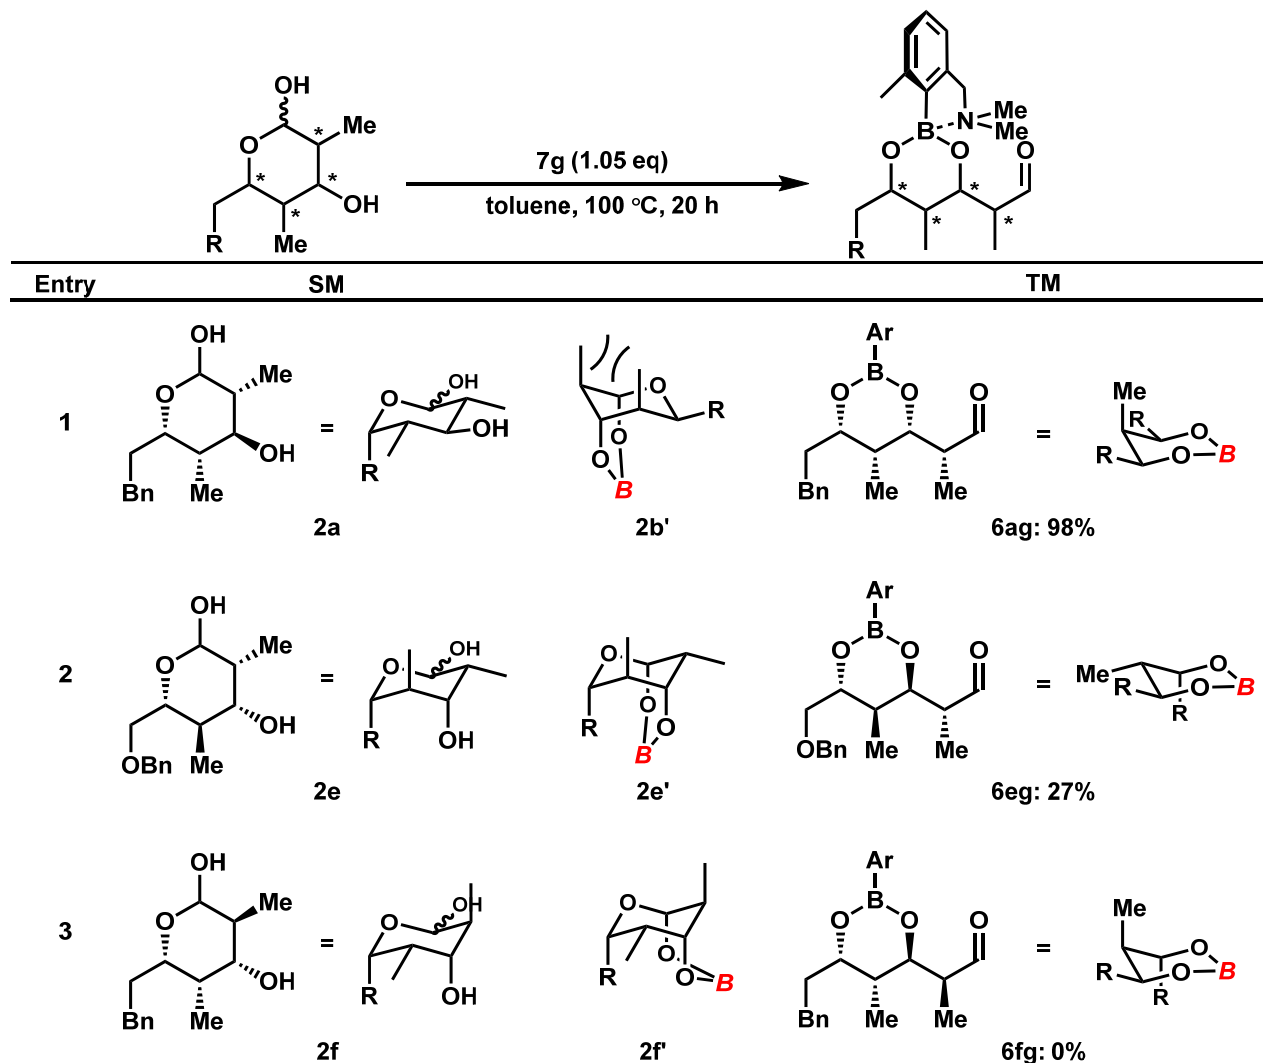

Using **7g** as the optimized ring-opening boron reagent, we examined the reactivity of cyclic hemiacetals bearing stereochemistry different from **2a**. **2a** reacted with **7g** to give thermodynamically stable boron ester **6ag** in 98% yield. **2a** and **7g** could afford boron ester **2b'**; however, **2b'** is destabilized by 1,3-diaxial interaction of methyl groups. In the case of **2e**, target product **6eg** was obtained in only 27% yield. We assume that relatively stable boron ester **2e'** is formed, and it disturbed ring-opening process of cyclic hemiacetal. In entry 3, we examined the reactivity of **7g** with cyclic hemiacetal **2f** which could form a similar boron ester **2f'** such as **2e'**. The ring opening reaction did not proceed at all. This result supports our hypothesis.

## Synthesis of Boronic acids

### (2-(methoxymethyl)-6-methylphenyl)boronic acid (7e)

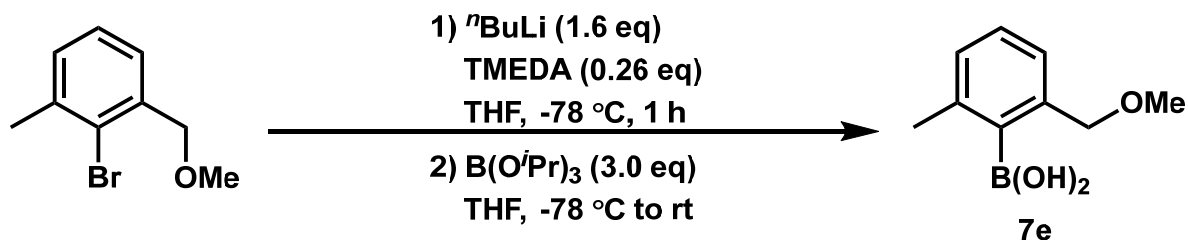

Under an argon atmosphere, tetramethylethylenediamine (96  $\mu\text{L}$ , 0.64 mmol) was added to a solution of 2-bromo-1-(methoxymethyl)-3-methylbenzene<sup>4</sup> (536 mg, 2.49 mmol) in THF (20mL). The mixture was cooled at  $-78\text{ }^{\circ}\text{C}$ , and butyllithium (2.65M, 1.46 mL, 3.87 mmol) was slowly added to the solution. The reaction mixture was stirred for an hour. Triisopropyl borate (1.7 mL, 7.41 mmol) was added to the solution. After stirring for 20 hours at room temperature, the solvent was evaporated. The reaction mixture was dissolved in dichloromethane, and insoluble materials were filtrated. Water was added to the filtrate, and the mixture was stirred overnight at room temperature. The solvent was evaporated, and the resulting residue was washed with hexane. The obtained solid was dissolved in dichloromethane and the insoluble solid was removed by filtration. After evaporation of solvent, obtained solid was used for the ring-opening reaction without further purification.

### (2-bromo-3-methylbenzyl)(methyl)sulfane (13)

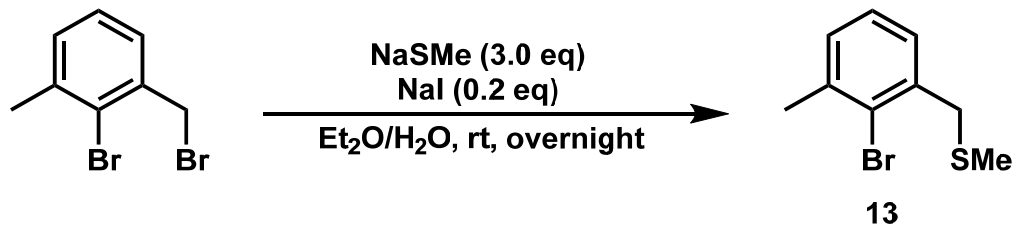

2-Bromo-1-(bromomethyl)-3-methylbenzene<sup>5</sup> (242.8 mg, 0.92 mmol)  $\text{Et}_2\text{O}$  (1.0 mL),  $\text{H}_2\text{O}$  (1.1 mL), sodium methanethiolate (0.193mg, 2.76 mmol), and sodium iodide (27.6 mg, 0.18 mmol) were added to a round bottom flask. After stirring the mixture for overnight at room temperature, the organic layer was separated, and the aqueous phase was extracted with  $\text{Et}_2\text{O}$ . The combined organic layers were washed with brine, dried over  $\text{Na}_2\text{SO}_4$ , filtered and concentrated. The residue was purified by column chromatography on silica gel eluting with hexane to afford desired product **13** (116.5 mg, 0.50 mmol, 55% yield) as yellow oil.

NMR spectroscopy:  $^1\text{H}$  NMR (400 MHz,  $\text{CDCl}_3$ ):  $\delta$  = 7.17-7.14 (m, 3H), 3.85 (s, 2H), 2.44 (s, 3H), 2.08 (s, 3H).  $^{13}\text{C}$  NMR (100 MHz,  $\text{CDCl}_3$ ):  $\delta$  = 139.27, 137.94, 129.66, 128.24, 127.27, 126.77, 39.55, 24.12, 15.42. IR spectroscopy ( $\text{CDCl}_3$ ,  $\text{cm}^{-1}$ ): 2909, 2357, 1435, 1026, 786, 738. Mass spectroscopy: HRMS-ESI ( $m/z$ ): calcd for  $\text{C}_9\text{H}_{11}\text{BrS}$  [ $\text{M}+\text{Ag}$ ] $^{+}$ : 338.8790, found: 338.8794.

(2-methyl-6-((methylthio)methyl)phenyl)boronic acid (**7f**)

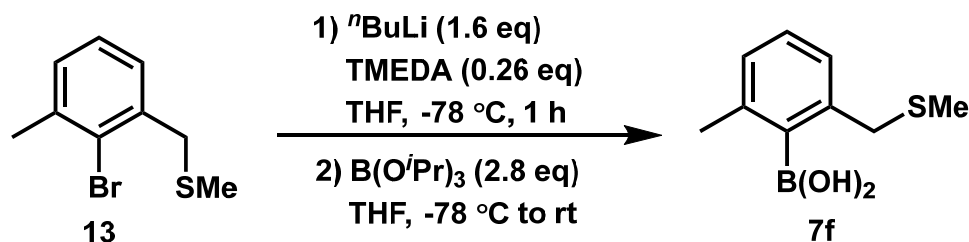

Under an argon atmosphere, tetramethylethylenediamine (118  $\mu\text{L}$ , 0.79 mmol) was added to a solution of (2-bromo-3-methylbenzyl)(methyl)sulfane **13** (706 mg, 3.05 mmol) in THF (25 mL). The mixture was cooled at  $-78\text{ }^{\circ}\text{C}$ , and butyllithium (2.65M, 1.46 mL, 4.74 mmol) was slowly added to the solution. The reaction mixture was stirred for an hour. Triisopropyl borate (1.7 mL, 8.63 mmol) was added to the solution. After stirring for 20 hours at room temperature, the solvent was evaporated. The reaction mixture was dissolved in dichloromethane, and insoluble materials were filtrated. Water was added to the filtrate, and the mixture was stirred overnight at room temperature. After evaporation, the residue was collected and washed with hexane. The obtained solid was dissolved in THF and the insoluble solid was removed by filtration. After evaporation, the obtained solid was dissolved in dichloromethane and the insoluble solid was removed by filtration. After evaporation of solvent, obtained solid was used for the ring-opening reaction without further purification.

(2-((dimethylamino)methyl)-6-methylphenyl)boronic acid (**7g**)

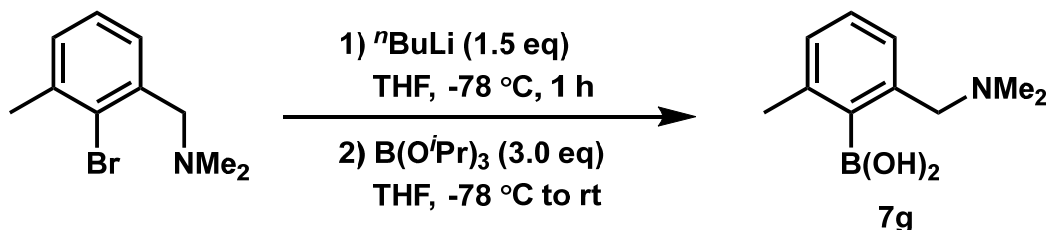

(2-((Dimethylamino)methyl)-6-methylphenyl)boronic acid **7g** was prepared according to the literature<sup>6</sup>.  $^1\text{H}$  NMR was taken using deuterated acetone and a drop of  $\text{D}_2\text{O}$ .

NMR spectroscopy:  $^1\text{H}$  NMR (400 MHz,  $(\text{CD}_3)_2\text{CO}$ ):  $\delta$  = 6.99 (dd,  $J$  = 7.8 Hz, 7.3 Hz, 1H), 6.87 (d,  $J$  = 7.8 Hz, 1H), 6.80 (d,  $J$  = 7.3 Hz, 1H), 3.78 (s, 2H), 2.45 (s, 6H), 2.34 (s, 3H).  $^{13}\text{C}$  NMR (100 MHz,  $(\text{CD}_3)_2\text{CO}$ ):  $\delta$  = 141.4, 141.1, 128.4, 127.5, 120.8, 64.2, 44.8, 20.4. IR spectroscopy ( $\text{CDCl}_3$ ,  $\text{cm}^{-1}$ ): 3281, 2922, 2357, 1457, 1009, 755. Mass spectroscopy: HRMS-ESI ( $m/z$ ): calcd for  $\text{C}_{10}\text{H}_{16}\text{BNO}_2$   $[\text{M}+\text{Na}]^+$ : 216.1166, found: 216.1171.

## Synthesis of Cyclic Hemiacetals

### (3*R*,4*S*,5*S*,6*S*)-3,5-dimethyl-6-phenethyltetrahydro-2*H*-pyran-2,4-diol (**2a**)

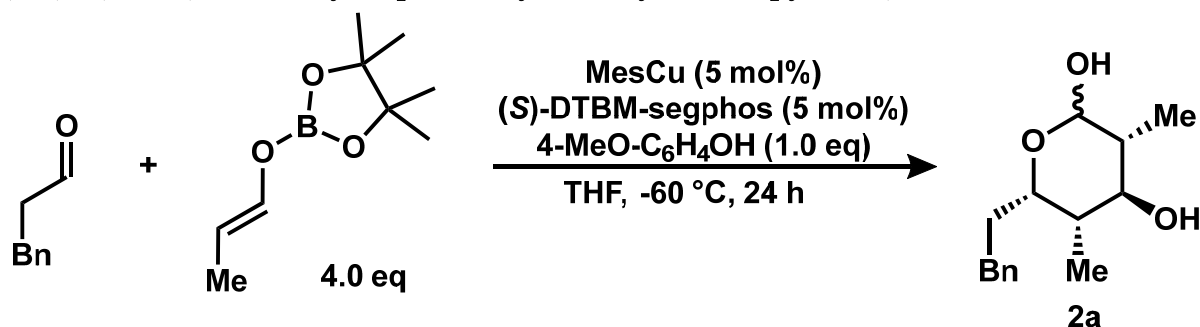

Under an argon atmosphere, mesitylcopper (82.2 mg, 0.45 mmol) and (*S*)-DTBM-segphos (530.8 mg, 0.45 mmol) were added to a round bottom flask, followed by the addition of THF (8 mL) and 4-MeO-C<sub>6</sub>H<sub>4</sub>OH (1117 mg, 9 mmol) at 23 °C. After cooled to -60 °C, a solution of boron enolate (36 mmol) in THF (30 mL) and aldehyde (4 mmol) were added, and the mixture was stirred for 24 hours at -60 °C. To this solution was added water, and the mixture was allowed to warm up to room temperature. The organic layer was separated, and the aqueous phase was extracted with EtOAc. The combined organic layers were washed with brine, dried over Na<sub>2</sub>SO<sub>4</sub>. After filtration and evaporation, the residue was purified by column chromatography on silica gel eluting with hexane/EtOAc = 4:1 to 1:1 to afford desired product (1.5g, 6.0 mmol, 67% yield) as a white solid (**2a** : anomer = 1 : 0.15).

NMR spectroscopy: <sup>1</sup>H NMR (400 MHz, CDCl<sub>3</sub>): δ = 7.31-7.28 (m, 2H), 7.23-7.18 (m, 3H), 4.80 (dd, *J* = 6.5, 4.6 Hz, 1H), 4.17 (dt, *J* = 10.9, 4.3 Hz, 1H), 3.44 (dd, *J* = 12.6, 6.0 Hz, 1H), 3.03 (d, *J* = 6.5 Hz, 1H), 2.86-2.80 (m, 1H), 2.68-2.62 (m, 1H), 2.00 (d, *J* = 6.0 Hz, 1H), 1.89-1.79 (m, 2H), 1.77-1.64 (m, 2H), 1.12 (d, *J* = 7.2 Hz, 3H), 1.00 (d, *J* = 7.2 Hz, 3H). <sup>13</sup>C NMR (125 MHz, CDCl<sub>3</sub>): δ = 142.2, 128.7, 128.5, 126.1, 96.0, 75.8, 69.9, 42.6, 39.9, 32.4, 31.4, 14.6, 13.1. Mass spectroscopy: HRMS-ESI (*m/z*): calcd for C<sub>15</sub>H<sub>22</sub>O<sub>3</sub> [M+Na]<sup>+</sup>: 273.1461, found 273.1460.

### (3*R*,4*S*,5*S*,6*S*)-3,5-diethyl-6-phenethyltetrahydro-2*H*-pyran-2,4-diol (**2b**)

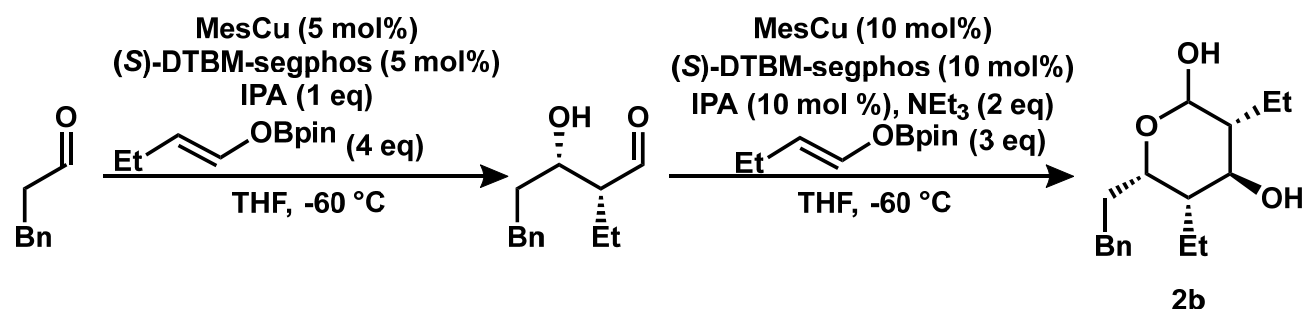

Under an argon atmosphere, mesitylcopper (36 mg, 0.2 mmol) and (*S*)-DTBM-segphos (236 mg, 0.2 mmol) were added to a round bottom flask, followed by the addition of THF (4 mL) and isopropanol (304 μL, 4 mmol) at 23 °C. After cooled to -60 °C, a solution of boron enolate (16 mmol) in THF (16 mL) and aldehyde (4.0 mmol) were added, and the mixture was stirred for 24



hours at  $-60\text{ }^{\circ}\text{C}$ . To this solution was added water, and the mixture was allowed to warm up to room temperature. The organic layer was separated, and the aqueous phase was extracted with EtOAc. The combined organic layers were washed with brine, dried over  $\text{Na}_2\text{SO}_4$ . After filtration and evaporation, the residue was purified by column chromatography on silica gel eluting with hexane/EtOAc = 3:1 to 1:1 to afford (2*S*,3*S*)-2-ethyl-3-hydroxy-5-phenylpentanal (770.3 mg, 3.7 mmol, 93% yield) as a white solid.

Under an argon atmosphere, mesitylcopper (18 mg, 0.1 mmol) and (*S*)-DTBM-segphos (118 mg, 0.1 mmol) were added to a round bottom flask, followed by the addition of THF (2 mL), isopropanol (7.7  $\mu\text{L}$ , 0.1 mmol), and triethylamine (279  $\mu\text{L}$ , 2 mmol) at  $23\text{ }^{\circ}\text{C}$ . After cooled to  $-60\text{ }^{\circ}\text{C}$ , a solution of boron enolate (3.0 mmol) in THF (3.0 mL) and (2*S*,3*S*)-2-ethyl-3-hydroxy-5-phenylpentanal (1.0 mmol) were added, and the mixture was stirred for 24 hours at  $-60\text{ }^{\circ}\text{C}$ . To this solution was added water, and the mixture was allowed to warm up to room temperature. The organic layer was separated, and the aqueous phase was extracted with EtOAc. The combined organic layers were washed with brine, dried over  $\text{Na}_2\text{SO}_4$ , filtered and concentrated. The residue was purified by column chromatography on silica gel eluting with hexane/EtOAc = 3:1 to 1:1 to afford desired product (108.3 mg, 0.39 mmol, 39% yield) as a white solid (**2b** : anomer = 1 : 0.11).

NMR spectroscopy:  $^1\text{H}$  NMR (500 MHz,  $\text{CDCl}_3$ ):  $\delta$  = 7.30-7.27 (m, 2H), 7.23-7.18 (m, 3H), 4.98 (dd,  $J$  = 6.5 Hz, 2.6 Hz, 1H), 4.29 (dt,  $J$  = 10.3 Hz, 3.6 Hz, 1H), 3.83-3.79 (m, 1H), 3.29 (d,  $J$  = 6.5 Hz, 1H), 2.88-2.82 (m, 1H), 2.67-2.66 (m, 1H), 2.20 (d,  $J$  = 5.7 Hz, 1H), 1.92-1.84 (m, 1H), 1.70-1.63 (m, 1H), 1.61-1.38 (m, 6H), 0.99 (t,  $J$  = 6.9 Hz, 3H), 0.94 (t,  $J$  = 7.4 Hz, 3H).  $^{13}\text{C}$  NMR (125 MHz,  $\text{CDCl}_3$ ):  $\delta$  = 142.2, 128.7, 128.5, 126.0, 94.7, 71.6, 67.6, 48.4, 46.8, 32.6, 32.1, 22.0, 19.6, 13.0, 12.6. Mass spectroscopy: HRMS-ESI ( $m/z$ ): calcd for  $\text{C}_{17}\text{H}_{26}\text{O}_3$   $[\text{M}+\text{Na}]^+$ : 301.1774, found: 301.1773.

### (3*R*,4*S*,5*S*,6*S*)-5-ethyl-3-methyl-6-phenethyltetrahydro-2H-pyran-2,4-diol (**2c**)

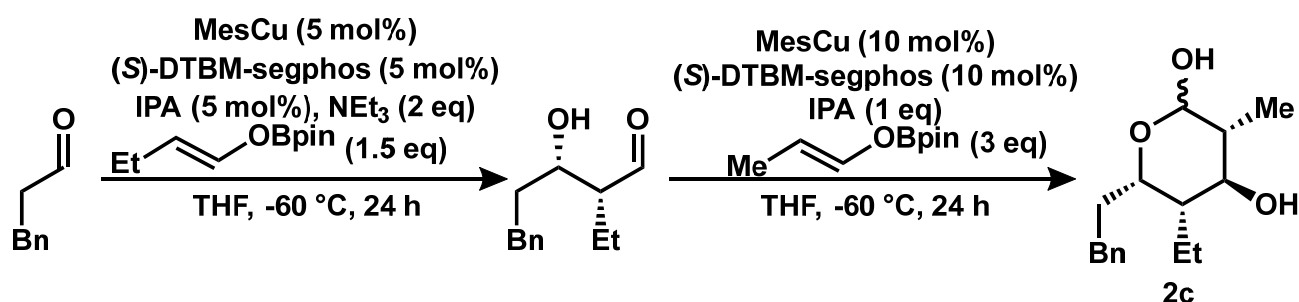

Under an argon atmosphere, mesitylcopper (27 mg, 0.2 mmol) and (*S*)-DTBM-segphos (177 mg, 0.2 mmol) were added to a round bottom flask, followed by the addition of THF (2 mL) and isopropanol (152  $\mu\text{L}$ , 2.0 mmol) at  $23\text{ }^{\circ}\text{C}$ . After cooled to  $-60\text{ }^{\circ}\text{C}$ , a solution of boron enolate (6.0 mmol) in THF (6.0 mL) and (2*S*,3*S*)-2-ethyl-3-hydroxy-5-phenylpentanal (2.0 mmol) were added, and the mixture was stirred for 24 hours at  $-60\text{ }^{\circ}\text{C}$ . To this solution was added water, and the mixture was allowed to warm up to room temperature. The organic layer was separated, and the

aqueous phase was extracted with EtOAc. The combined organic layers were washed with brine, dried over Na<sub>2</sub>SO<sub>4</sub>, filtered and concentrated. The residue was purified by column chromatography on silica gel eluting with hexane/EtOAc = 3:1 to 1:1 to afford desired product (228.9 mg, 0.86 mmol, 43% yield) as a white solid (**2c** : anomer = 1 : 0.09).

NMR spectroscopy: <sup>1</sup>H NMR (500 MHz, CDCl<sub>3</sub>): δ = 7.30-7.26 (m, 2H), 7.23-7.18 (m, 3H), 4.72 (dd, *J* = 6.6 Hz, 6.3 Hz, 1H), 4.17 (dt, *J* = 11.5, 4.0 Hz, 1H), 3.45-3.41 (m, 1H), 3.17 (d, *J* = 6.6 Hz, 1H), 2.85-2.83 (m, 1H), 2.66-2.64 (m, 1H), 1.96 (d, *J* = 6.6 Hz, 1H), 1.86-1.82 (m, 1H), 1.72-1.58 (m, 4H), 1.29-1.23 (m, 1H), 1.12 (d, *J* = 6.7 Hz, 3H), 0.89 (t, *J* = 7.2 Hz, 3H). <sup>13</sup>C NMR (125 MHz, CDCl<sub>3</sub>): δ = 142.0, 128.6, 128.5, 126.1, 95.2, 73.6, 70.9, 47.1, 44.4, 32.4, 29.8, 20.4, 13.9, 12.1. Mass spectroscopy: HRMS-ESI (*m/z*): calcd for C<sub>16</sub>H<sub>24</sub>O<sub>3</sub> [M+Na]<sup>+</sup>: 287.1618, found 287.1620.

**(3*R*,4*S*,5*S*,6*R*)-3,5-diethyl-6-phenyltetrahydro-2H-pyran-2,4-diol (**2d**)**

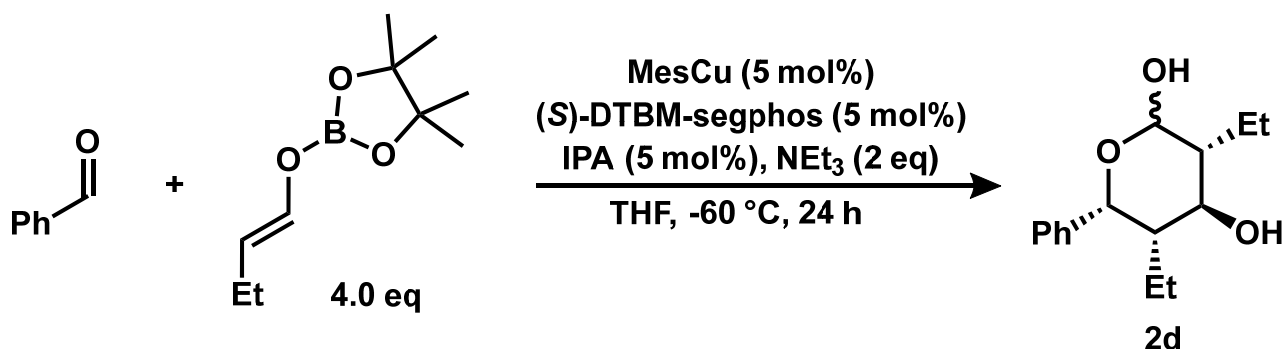

Under an argon atmosphere, mesitylcopper (46 mg, 0.25 mmol) and (*S*)-DTBM-segphos (295 mg, 0.25 mmol) were added to a round bottom flask, followed by the addition of THF (5 mL), isopropanol (19 μL, 0.25 mmol) and triethylamine (1.4 mL, 10 mmol) at 23 °C. After cooled to –60 °C, a solution of boron enolate (20 mmol) in THF (20 mL) and aldehyde (5 mmol) were added, and the mixture was stirred for 24 hours at –60 °C. To this solution was added water, and the mixture was allowed to warm up to room temperature. The organic layer was separated, and the aqueous phase was extracted with EtOAc. The combined organic layers were washed with brine, dried over Na<sub>2</sub>SO<sub>4</sub>, filtered and concentrated. The residue was purified by column chromatography on silica gel eluting with hexane/EtOAc = 4:1 to 1:1 to afford desired product (402.8 mg, 1.6 mmol, 32% yield) as a white solid (**2d** : aldehyde form = 1 : 0.08).

NMR spectroscopy: <sup>1</sup>H NMR (500 MHz, CDCl<sub>3</sub>): δ = 7.33-7.32 (m, 4H), 7.26-7.22 (m, 1H), 5.62 (d, *J* = 3.4 Hz, 1H), 5.28 (d, *J* = 5.2 Hz, 1H), 4.08-4.01 (m, 1H), 3.70 (brs, 1H), 3.01 (brs, 1H), 1.81-1.77 (m, 2H), 1.67-1.60 (m, 1H), 1.54-1.46 (m, 1H), 1.28-1.13 (m, 2H), 1.03 (t, *J* = 5.7 Hz, 3H), 0.58 (t, *J* = 7.4 Hz, 3H). <sup>13</sup>C NMR (125 MHz, CDCl<sub>3</sub>): δ = 140.8, 128.2, 126.9, 126.0, 96.3, 72.0, 67.1, 48.2, 46.3, 23.0, 19.4, 13.4, 13.3. Mass spectroscopy: HRMS-ESI (*m/z*): calcd for C<sub>15</sub>H<sub>22</sub>O<sub>3</sub> [M+Na]<sup>+</sup>: 273.1461, found 273.1462.

**(3*S*,4*R*,5*S*,6*S*)-3,5-dimethyl-6-phenethyltetrahydro-2*H*-pyran-2,4-diol (2f)**

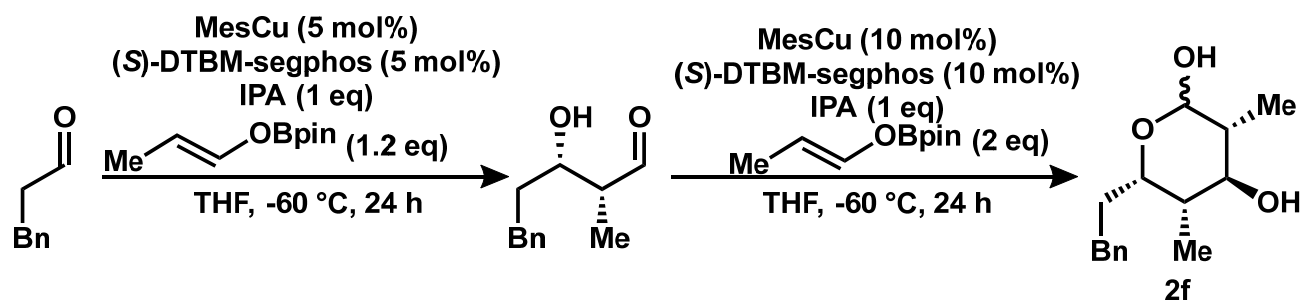

Under an argon atmosphere, mesitylcopper (36 mg, 0.2 mmol) and (*S*)-DTBM-segphos (236 mg, 0.2 mmol) were added to a round bottom flask, followed by the addition of THF (4 mL) and isopropanol (304  $\mu$ L, 4 mmol) at 23 °C. After cooled to -60 °C, a solution of boron enolate (4.8 mmol) in THF (4.8 mL) and aldehyde (4 mmol) were added, and the mixture was stirred for 24 hours at -60 °C. To this solution was added water, and the mixture was allowed to warm up to room temperature. The organic layer was separated, and the aqueous phase was extracted with EtOAc. The combined organic layers were washed with brine, dried over Na<sub>2</sub>SO<sub>4</sub>, filtered and concentrated. The residue was purified by column chromatography on silica gel eluting with hexane/EtOAc = 2:1 to afford desired product (607.5 mg, 3.16 mmol, 79% yield) as a colorless oil. Under an argon atmosphere, mesitylcopper (30 mg, 0.16 mmol) and (*R*)-DTBM-segphos (194 mg, 0.16 mmol) were added to a round bottom flask, followed by the addition of THF (3 mL) and isopropanol (125  $\mu$ L, 1.6 mmol) at 23 °C. After cooled to -60 °C, a solution of boron enolate (3.2 mmol) in THF (3.2 mL) and aldehyde (1.6 mmol) were added, and the mixture was stirred for 24 hours at -60 °C. To this solution was added water, and the mixture was allowed to warm up to room temperature. The organic layer was separated, and the aqueous phase was extracted with EtOAc. The combined organic layers were washed with brine, dried over Na<sub>2</sub>SO<sub>4</sub>, filtered and concentrated. The residue was purified by column chromatography on silica gel eluting with hexane/EtOAc = 4:1 to 1:1 to afford desired product (102.6 mg, 0.41 mmol, 26% yield) as a white solid (**2f** : anomer = 1 : 0.5).

NMR spectroscopy: <sup>1</sup>H NMR (500 MHz, CDCl<sub>3</sub>):  $\delta$  = 7.30-7.27 (m, 2H), 7.21-7.18 (m, 3H), 4.30 (dd,  $J$  = 8.0, 6.3 Hz, 1H), 3.43-3.39 (m, 2H), 3.21 (d,  $J$  = 6.3 Hz, 1H), 2.80-2.71 (m, 1H), 2.67-2.57 (m, 1H), 2.10-1.85 (m, 2H), 1.73-1.53 (m, 3H), 1.08 (d,  $J$  = 6.3 Hz, 3H), 0.95 (d,  $J$  = 6.9 Hz, 3H). <sup>13</sup>C NMR (125 MHz, CDCl<sub>3</sub>):  $\delta$  = 141.9, 128.6, 128.5, 126.0, 99.7, 74.2, 71.6, 40.2, 38.2, 34.1, 32.3, 12.7, 5.7. Mass spectroscopy: HRMS-ESI ( $m/z$ ): calcd for C<sub>15</sub>H<sub>22</sub>O<sub>3</sub> [M+Na]<sup>+</sup>: 273.1461, found 273.1461.

## Ring-Opening Reaction of 2a

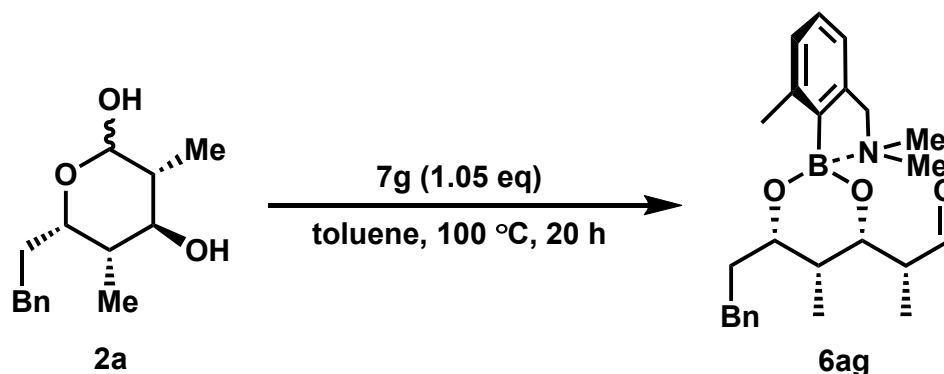

Cyclic hemiacetal **2a** (12.5 mg, 0.05 mmol) and **7g** (10.1 mg, 0.053 mmol) were added to a test tube, followed by the addition of toluene (1 mL) at 23 °C. After stirred for 20 hours at 100 °C, the solvent was evaporated. Deuterated chloroform was added to this crude mixture, followed by the addition of 1,1,2,2-tetrachloroethane (10.6  $\mu$ L, 0.1 mmol) as an internal standard. The solution was transferred to an NMR tube.  $^1\text{H}$ -NMR and  $^{11}\text{B}$ -NMR were taken at room temperature. The yield was determined by  $^1\text{H}$  NMR using the internal standard.

NMR spectroscopy:  $^1\text{H}$  NMR (500 MHz,  $\text{CDCl}_3$ ):  $\delta$  = 9.82 (d,  $J$  = 2.3 Hz, 1H), 7.30-7.27 (m, 2H), 7.25-7.15 (m, 3H), 7.10 (dd,  $J$  = 7.3 Hz, 7.3 Hz, 1H), 7.01 (d,  $J$  = 7.3 Hz, 1H), 6.84 (d,  $J$  = 7.3 Hz, 1H), 4.20 (dd,  $J$  = 8.9 Hz, 2.5 Hz, 1H), 4.11-4.07 (m, 1H), 3.74 (d,  $J$  = 13.7 Hz, 1H), 3.70 (d,  $J$  = 13.7 Hz, 1H), 2.90-2.83 (m, 1H), 2.77-2.69 (m, 1H), 2.67-2.59 (m, 1H), 2.53 (s, 6H), 2.47 (s, 3H), 2.01-1.92 (m, 1H), 1.80-1.68 (m, 2H), 1.22 (d,  $J$  = 7.3 Hz, 3H), 1.07 (d,  $J$  = 7.3 Hz, 3H).  $^{11}\text{B}$  NMR (125 MHz,  $\text{CDCl}_3$ ):  $\delta$  = 13.7.

## ethyl (4*S*,5*R*,6*R*,7*S*,*E*)-5,7-dihydroxy-4,6-dimethyl-9-phenylnon-2-enoate (**9**)

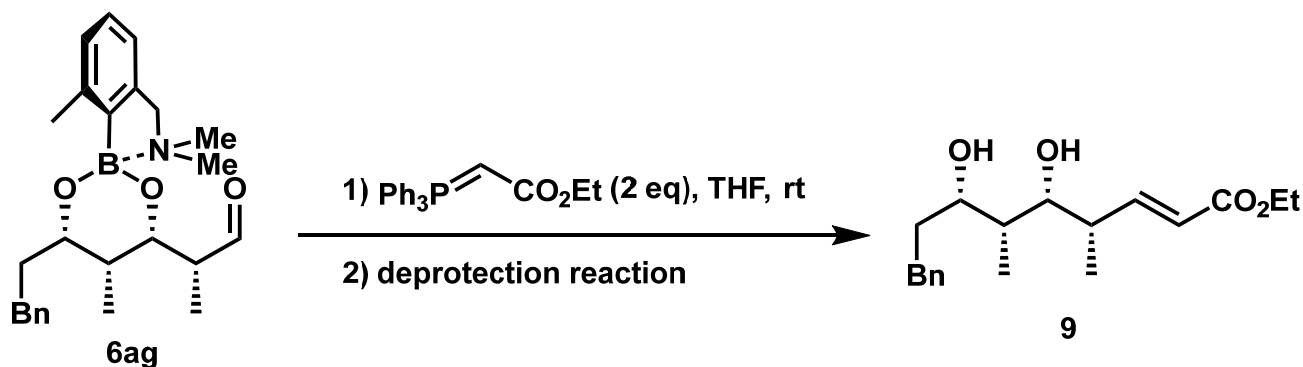

To a solution of **6ag** (0.05 mmol) in THF (1.0 mL) was added ethyl(triphenylphosphoranylidene) acetate (34.8 mg, 0.10 mmol) at room temperature. After stirring for 5 hours, the solvent was removed by evaporation. To this residue, MeOH (1.0 mL) and 2-amino-2-methyl-1,3-propanediol (15.8 mg, 0.15 mmol) were added. After stirring for 24 hours at 50 °C, the reaction mixture was concentrated under reduced pressure. The resulting mixture was diluted with EtOAc and washed with brine, dried over  $\text{Na}_2\text{SO}_4$ , filtered and concentrated. The residue was purified by column chromatography on silica gel eluting with hexane/EtOAc = 2:1 to afford desired product **9** (12.1

mg, 0.037 mmol, 76% yield) as a colorless oil.

NMR spectroscopy:  $^1\text{H}$  NMR (500 MHz,  $\text{CDCl}_3$ ):  $\delta$  = 7.31-7.28 (m, 2H), 7.21-7.18 (m, 3H), 6.75 (dd,  $J$  = 15.6, 9.5 Hz, 1H), 5.85 (d,  $J$  = 15.6 Hz, 1H), 4.19 (q,  $J$  = 7.2 Hz, 2H), 3.83-3.82 (m, 1H), 3.60 (d,  $J$  = 8.6 Hz, 1H), 3.07 (brs, 1H), 2.75-2.71 (m, 1H), 2.67-2.63 (m, 1H), 2.51-2.46 (m, 1H), 2.29 (brs, 1H), 1.88-1.82 (m, 1H), 1.74-1.70 (m, 1H), 1.56-1.53 (m, 1H), 1.30 (t,  $J$  = 7.2 Hz, 3H), 1.13 (d,  $J$  = 6.7 Hz, 3H), 0.90 (d,  $J$  = 6.7 Hz, 3H).  $^{13}\text{C}$  NMR (125 MHz,  $\text{CDCl}_3$ ):  $\delta$  = 166.7, 150.3, 141.7, 128.7, 128.6, 126.2, 121.7, 80.2, 77.0, 60.6, 41.1, 39.1, 37.2, 32.6, 17.0, 14.4, 4.4. IR spectroscopy ( $\text{CDCl}_3$ ,  $\text{cm}^{-1}$ ): 3413, 2932, 1717, 1651, 700. Mass spectroscopy: HRMS-ESI ( $m/z$ ): calcd for  $\text{C}_{19}\text{H}_{28}\text{O}_4$   $[\text{M}+\text{Na}]^+$ : 343.1880, found 343.1881. Optical rotation:  $[\alpha]_{\text{D}}^{25.6}$  = -28.5 ( $c$  = 0.23, MeOH).

**(3*S*,4*R*,5*S*,6*S*)-4,6-dimethyl-1-phenyldec-9-ene-3,5,7-triol (10)**

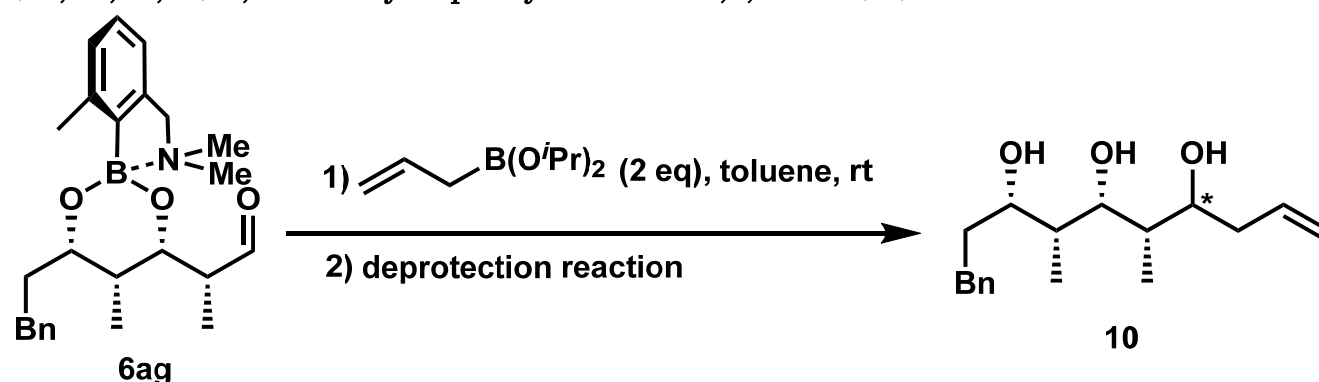

To a solution of **6ag** (0.05 mmol) in toluene (1.0 mL) was added diisopropyl allylboronate (20.8  $\mu\text{L}$ , 0.10 mmol) at room temperature. After stirring for 2 hours, the solvent was removed by evaporation. To this residue, MeOH (1.0 mL) and 2-amino-2-methyl-1,3-propanediol (15.8 mg, 015 mmol) were added. After stirring for 24 hours at 50  $^\circ\text{C}$ , the reaction mixture was concentrated under reduced pressure. The resulting mixture was diluted with EtOAc and washed with brine, dried over  $\text{Na}_2\text{SO}_4$ , filtered and concentrated. After the determination of diastereoselectivity by  $^1\text{H}$  NMR, the residue was purified by column chromatography on silica gel eluting with hexane/EtOAc = 1:1 to afford desired product **10** (10.7 mg, 0.036 mmol, 73% yield, 2.6/1 dr) as a colorless oil.

NMR spectroscopy: Major isomer:  $^1\text{H}$  NMR (500 MHz,  $\text{CDCl}_3$ ):  $\delta$  = 7.31-7.28 (m, 2H), 7.22-7.18 (m, 3H), 5.83-5.74 (m, 1H), 5.16 (d,  $J$  = 5.7 Hz, 1H), 5.13 (s, 1H), 3.87 (dd,  $J$  = 4.6 Hz, 4.6Hz, 1H), 3.84-3.79 (m, 2H), 2.75 (m, 1H), 2.64 (m, 1H), 2.23 (m, 1H), 2.17 (brs, 1H), 2.04 (brs, 1H), 1.87 (m, 1H), 1.71 (m, 2H), 0.98 (d,  $J$  = 7.4 Hz, 3H), 0.96 (d,  $J$  = 6.9 Hz, 3H).  $^{13}\text{C}$  NMR (125 MHz,  $\text{CDCl}_3$ ):  $\delta$  = 142.0, 135.0, 128.6, 128.6, 126.1, 118.5, 79.7, 75.1, 74.0, 40.1, 40.0, 39.7, 37.3, 32.7, 6.9, 6.7. IR spectroscopy ( $\text{CDCl}_3$ ,  $\text{cm}^{-1}$ ): 3383, 2924, 1716, 1456, 699. Mass spectroscopy: HRMS-ESI ( $m/z$ ): calcd for  $\text{C}_{17}\text{H}_{28}\text{O}_3$   $[\text{M}+\text{Na}]^+$ : 315.1931, found 315.1931.

(4*S*,5*S*,6*R*,7*S*)-4,6-dimethyl-9-phenylnonane-1,3,5,7-tetraol (**14**)

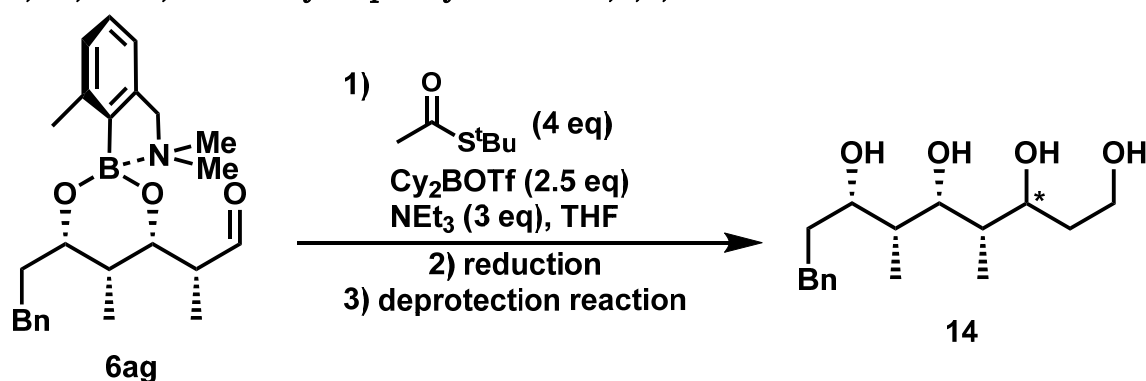

To a solution of dicyclohexylboron trifluoromethanesulfonate (122.4 mg, 0.38 mmol) in hexane (0.85 mL), triethylamine (62.8  $\mu\text{L}$ , 0.45 mmol) and S-*t*-butyl phenylthioacetate (85.6  $\mu\text{L}$ , 0.6 mmol) were added at 0 °C under an argon atmosphere. After stirring for 2 hours, this boron-enolate solution (0.5 mL) was transferred to a solution of **6ag** (0.1 mmol) in dichloromethane (0.33 mL) at -78 °C. The mixture was allowed to stir for 2 hours. To this solution, a solution of  $\text{LiBH}_4$  (0.5 mmol) in THF (0.25 mL) was added. The mixture was allowed to warm up to room temperature, and stirred for overnight. To this mixture was added HCl (1 M). The organic layer was separated, and the aqueous phase was extracted with  $\text{Et}_2\text{O}$ . To the combined organic layers, water and an excess of  $\text{H}_2\text{O}_2$  and NaOH were added. After stirring for overnight at 23 °C,  $\text{Na}_2\text{SO}_3$  was added to the solution. The layers were separated, and the aqueous phase was extracted with  $\text{Et}_2\text{O}$ . The combined organic layers were washed with brine, dried over  $\text{Na}_2\text{SO}_4$ , filtered and concentrated. After the determination of diastereoselectivity by LC/MS analysis, the residue was purified by column chromatography on silica gel eluting with  $\text{EtOAc}$  to afford the title compound **14** (18.0 mg, 0.061 mmol, 61%, 3.4/1 dr) as colorless oil. Stereoisomers were separated by preparative HPLC using Daicel Chiralpak IA.

NMR spectroscopy: Major isomer:  $^1\text{H}$  NMR (500 MHz,  $\text{CD}_3\text{OD}$ ):  $\delta$  = 7.27-7.20 (m, 4H), 7.14 (t,  $J$  = 7.16 Hz, 1H), 3.79-3.64 (m, 5H), 2.77-2.72 (m, 1H), 2.65-2.59 (m, 1H), 1.85-1.59 (m, 6H), 1.00 (d,  $J$  = 6.9 Hz, 3H), 0.89 (d,  $J$  = 6.9 Hz, 3H).  $^{13}\text{C}$  NMR (100 MHz,  $\text{CD}_3\text{OD}$ ):  $\delta$  = 143.5, 129.4, 129.4, 126.8, 75.2, 73.0, 72.3, 60.6, 41.4, 41.3, 38.1, 37.3, 33.5, 10.5, 8.7. IR spectroscopy ( $\text{CDCl}_3$ ,  $\text{cm}^{-1}$ ): 3375, 2924, 1681, 1455, 1203. Mass spectroscopy: HRMS-ESI ( $m/z$ ): calcd for  $\text{C}_{17}\text{H}_{28}\text{O}_4$   $[\text{M}+\text{Na}]^+$ : 319.1880, found: 319.1880. Optical rotation:  $[\alpha]_{\text{D}}^{29.4} = -61.5$  ( $c$  = 0.26,  $\text{CHCl}_3$ ).

Minor isomer:  $^1\text{H}$  NMR (500 MHz,  $\text{CD}_3\text{OD}$ ):  $\delta$  = 7.27-7.20 (m, 4H), 7.14 (t,  $J$  = 7.16 Hz, 1H), 3.88-3.84 (m, 1H), 3.72-3.63 (m, 4H), 2.80-2.74 (m, 1H), 2.65-2.59 (m, 1H), 1.86-1.62 (m, 6H), 0.96 (d,  $J$  = 6.9 Hz, 3H), 0.90 (d,  $J$  = 6.9 Hz, 3H).  $^{13}\text{C}$  NMR (100 MHz,  $\text{CD}_3\text{OD}$ ):  $\delta$  = 143.6, 129.5, 129.4, 126.8, 78.2, 73.9, 71.8, 60.4, 41.0, 40.7, 38.7, 38.3, 33.4, 8.1, 8.1. IR spectroscopy ( $\text{CDCl}_3$ ,  $\text{cm}^{-1}$ ): 3381, 2924, 1682, 1455. Mass spectroscopy: HRMS-ESI ( $m/z$ ): calcd for  $\text{C}_{17}\text{H}_{28}\text{O}_4$   $[\text{M}+\text{Na}]^+$ : 319.1880, found: 319.1880. Optical rotation:  $[\alpha]_{\text{D}}^{29.4} = -138.5$  ( $c$  = 0.13,  $\text{CHCl}_3$ ).

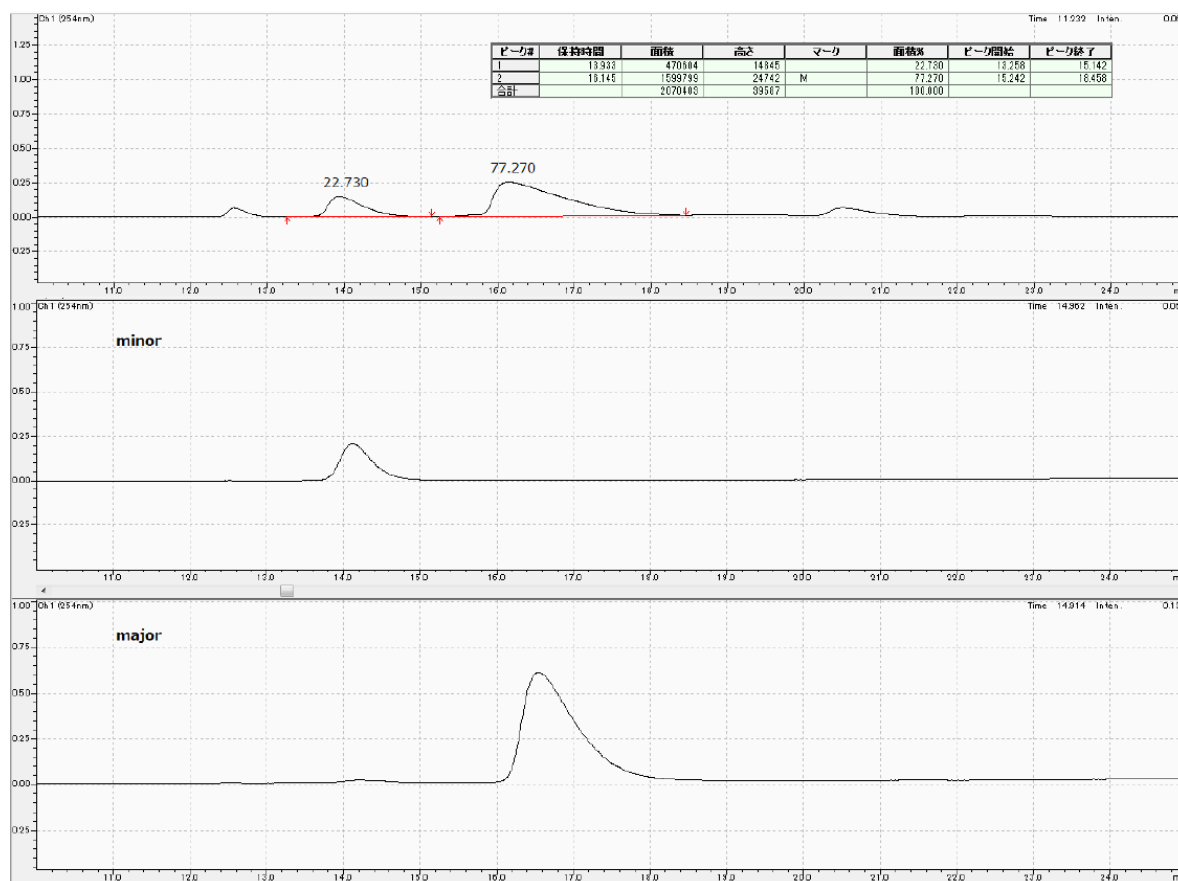

(2*S*,3*R*,4*S*,5*S*,6*R*,7*S*)-2,4,6-trimethyl-9-phenylnonane-1,3,5,7-tetraol (**15**)

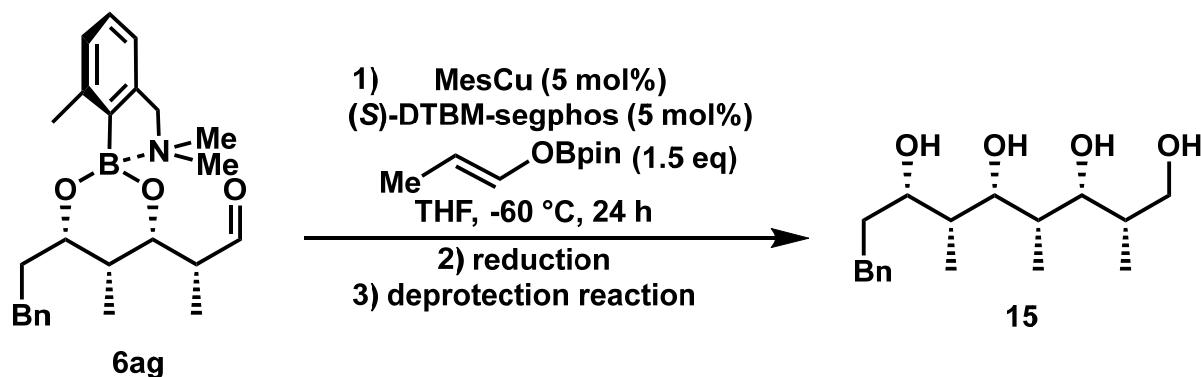

Under an argon atmosphere, mesitylcopper (0.9 mg, 0.005 mmol) and (*S*)-DTBM-segphos (5.9 mg, 0.005 mmol) were dissolved in THF (0.2 mL) at 23 °C. After cooled to -60 °C, a solution of boron enolate (0.15 mmol) in THF (0.15 mL) and **6ag** (0.1 mmol) were added, and the mixture was stirred for 24 hours at -60 °C. To this solution, a solution of LiBH<sub>4</sub> (0.5 mmol) in THF (0.25 mL) was added. The mixture was allowed to warm up to room temperature, and stirred for overnight. To this mixture was added HCl (1 M). The layers were separated, and the aqueous phase was extracted with Et<sub>2</sub>O. To the combined organic layers, water and an excess of H<sub>2</sub>O<sub>2</sub> and NaOH were added. After stirring for overnight at 23 °C, Na<sub>2</sub>SO<sub>3</sub> was added to the solution. The organic layer was separated, and the aqueous phase was extracted with Et<sub>2</sub>O. The combined organic layers were washed with brine,

dried over Na<sub>2</sub>SO<sub>4</sub>, filtered and concentrated. Yield and diastereoselectivity was determined by LC/MS analysis according to the literature<sup>3</sup>.

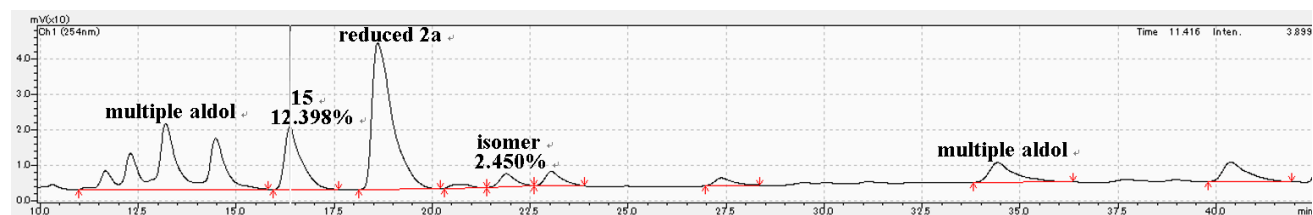

| ピーク# | 保持時間   | 面積      | 高さ    | マーク | 面積%     | ピーク開始  | ピーク終了  |
|------|--------|---------|-------|-----|---------|--------|--------|
| 1    | 13.199 | 1205338 | 18596 | M   | 31.266  | 10.983 | 15.800 |
| 2    | 16.398 | 509697  | 17685 | M   | 12.398  | 15.933 | 17.600 |
| 3    | 18.610 | 1494996 | 41287 | M   | 38.366  | 18.125 | 20.200 |
| 4    | 20.830 | 34946   | 989   | M   | 0.850   | 20.317 | 21.400 |
| 5    | 21.890 | 100707  | 3685  | M   | 2.450   | 21.400 | 22.600 |
| 6    | 23.941 | 116833  | 4927  | M   | 2.991   | 22.800 | 23.893 |
| 7    | 27.378 | 69271   | 2167  | M   | 1.885   | 26.975 | 28.350 |
| 8    | 34.428 | 253882  | 5539  | M   | 6.176   | 33.817 | 36.358 |
| 9    | 40.377 | 243336  | 5541  | M   | 5.919   | 39.808 | 41.942 |
| 合計   |        | 4111006 | 99446 |     | 100.000 |        |        |



## Control Experiments of Transformation of Ring-Opened Aldehyde 6ag

### Wittig reaction

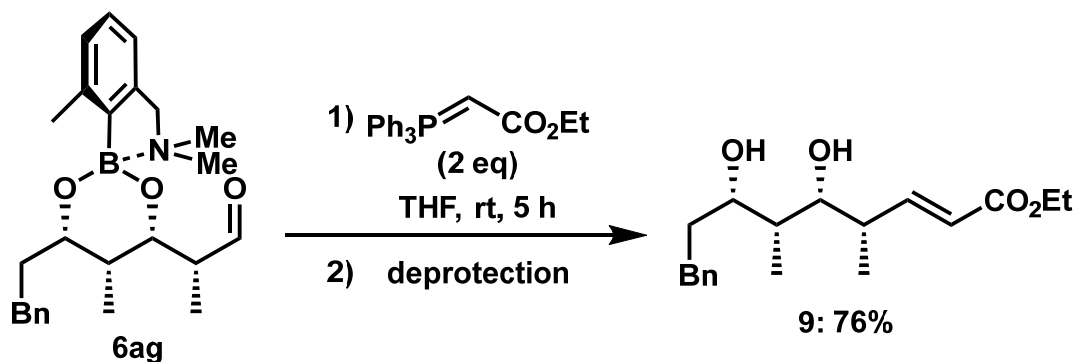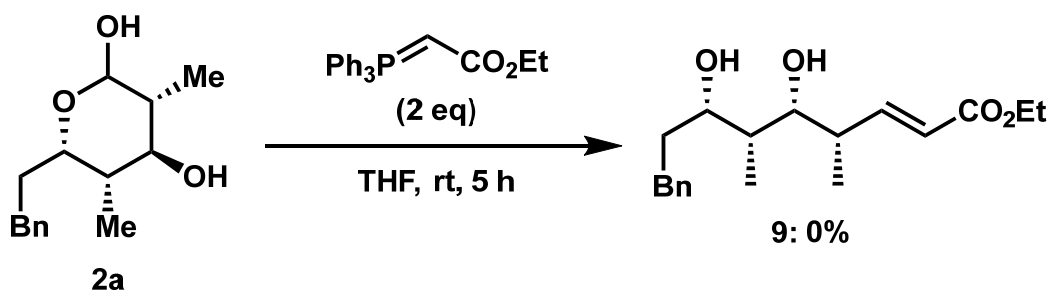

### Allylation reaction

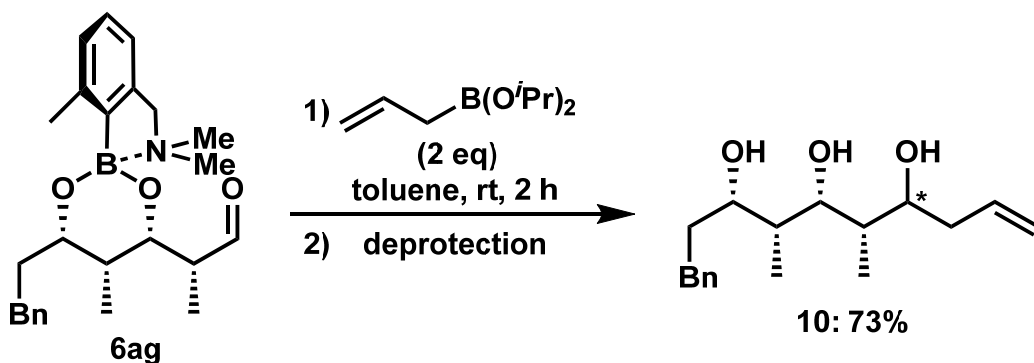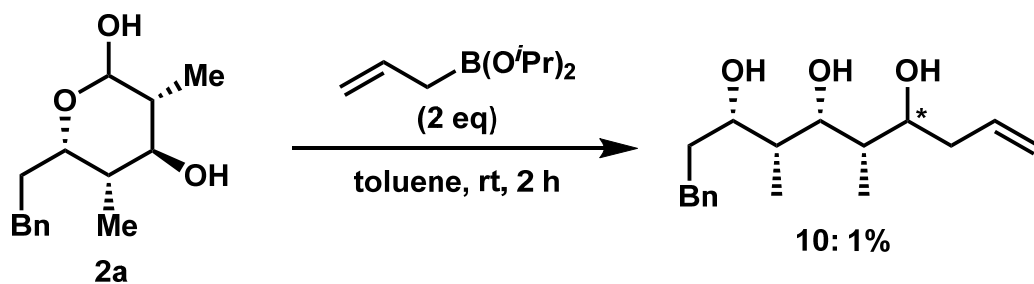

In order to demonstrate that ring-opening of hemiacetal **2a** by amine-tethered phenylboronic acid **7g** is critical for the transformations of **2a**, control experiments were conducted using **2a** without the ring-opening procedure. In the Wittig reaction, the desired product **9** was not obtained, and the starting material was recovered quantitatively. The allylation reaction afforded the desired product **10** in 1% yield. The starting material was recovered mainly.

## References

- 1 T. Tsuda, T. Yazawa, K. Watanabe, T. Fuji, T. Saegusa, *J. Org. Chem.* **1981**, *46*, 192.
- 2 J. Casas, M. Engqvist, I. Ibrahem, B. Kaynak, A. Córdova, *Angew. Chem., Int. Ed.* **2005**, *44*, 1343.
- 3 L. Lin, K. Yamamoto, H. Mitsunuma, Y. Kanzaki, S. Matsunaga and M. Kanai, *J. Am. Chem. Soc.* **2015**, *137*, 15418.
- 4 M. P. Robinson and G. C. Lloyd-Jones, *ACS Catal.* **2018**, *8*, 7484.
- 5 S. Rousseaux, J. Garcia-Fortanet, M. A. D. A. Sanchez, and S. L. Buchwald. *J. Am. Chem. Soc.* **2011**, *133*, 9282.
- 6 S. Toyota, T. Futawaka, M. Asakura, H. Ikeda, and M. Oki, *Organometallics*, **1998**, *17*, 4155.

H:\NMR\Kanzaki\Amine-Tethered Phenylboronic Acid Enabling Ring-Opening Strategy for Carbon Chain Elongation from Double Aldol Cyclic Hemiacetals\1\_Me-Br-SMe-benzene-H.als

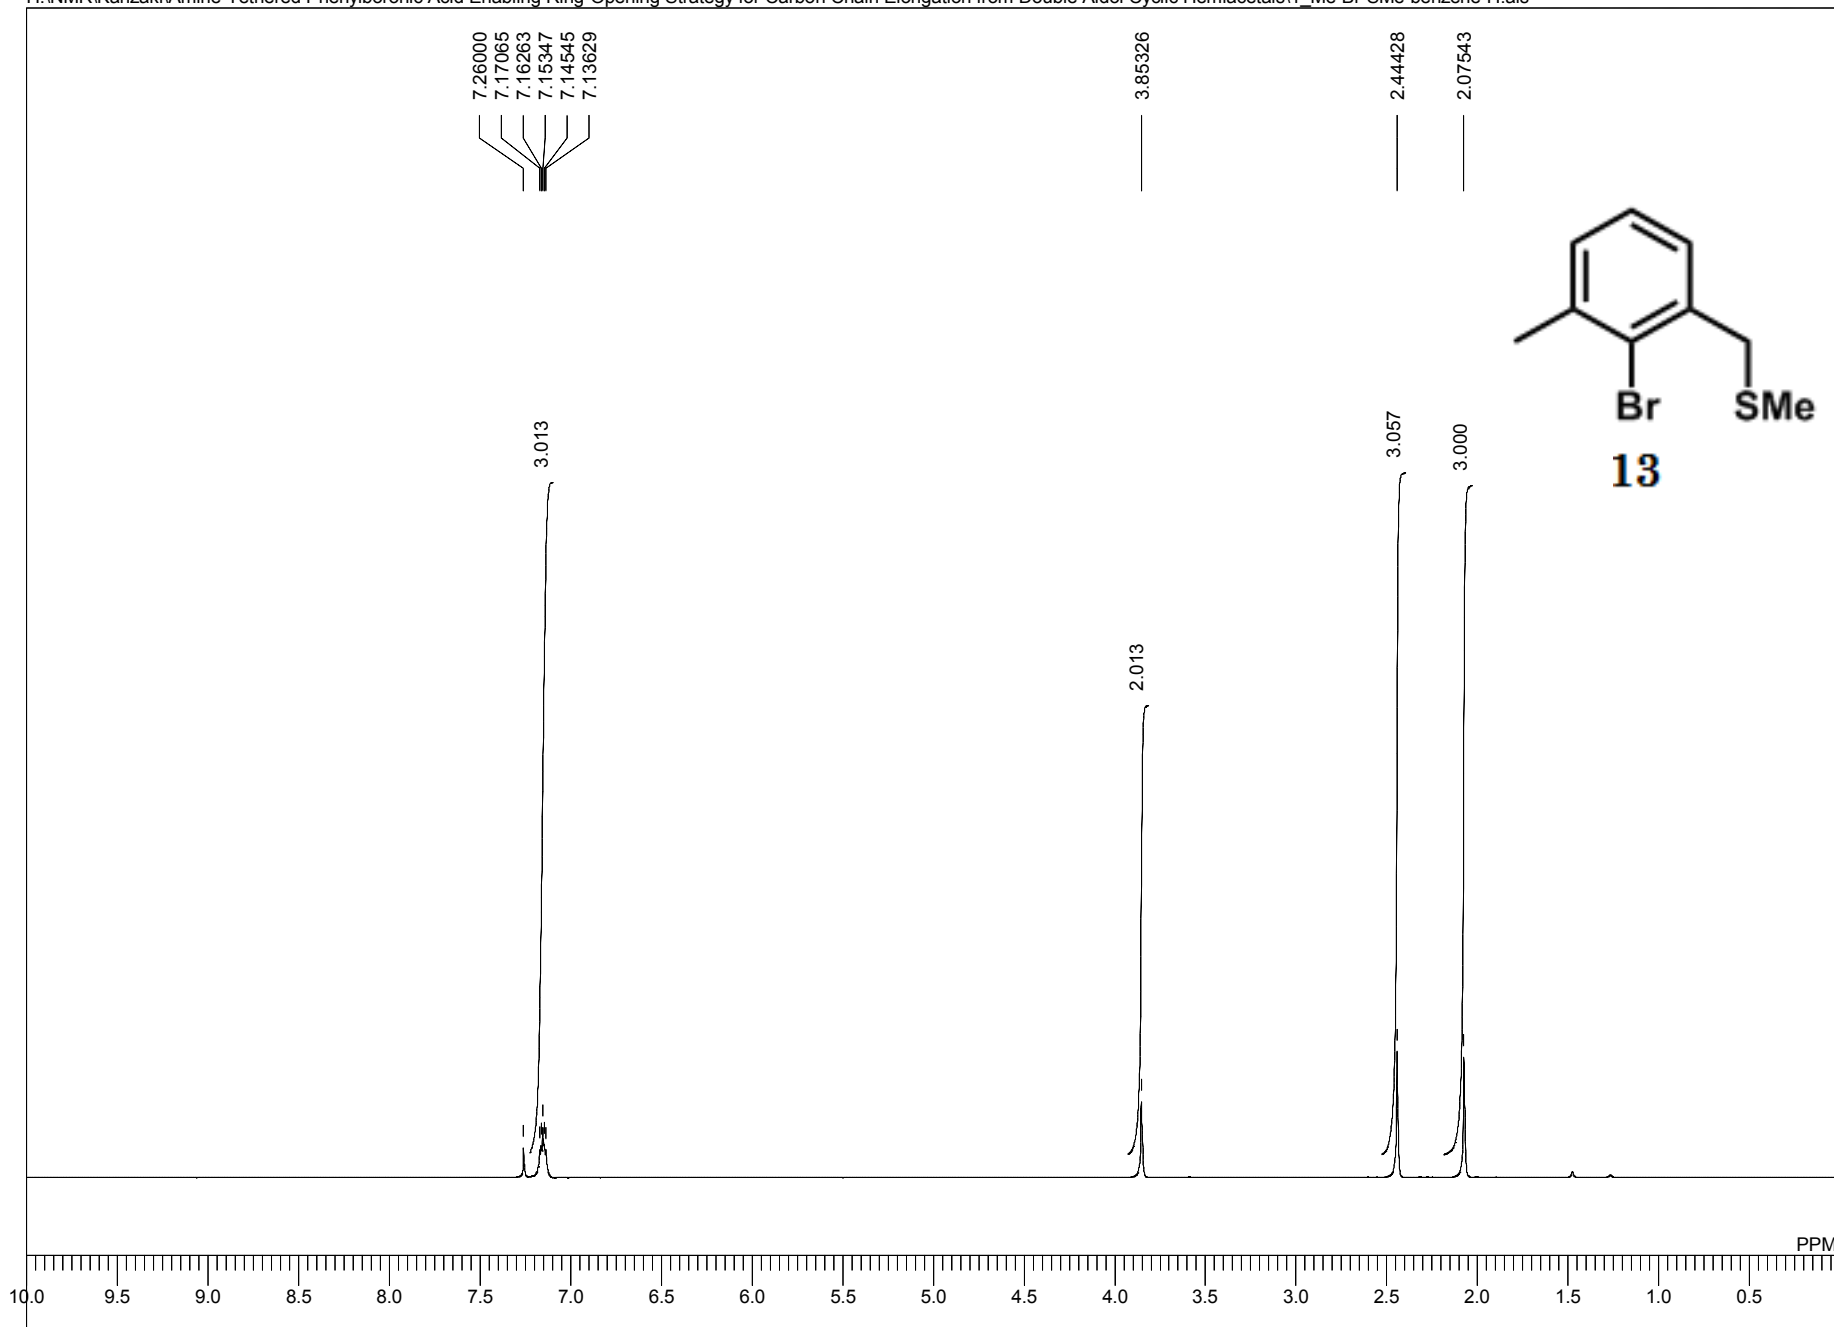

DFILE 1\_Me-Br-SMe-benzene-H.als  
 COMNT  
 DATIM 25-01-2018 20:50:17  
 OBNUC 1H  
 EXMOD proton.jpg  
 OBFRQ 391.78 MHz  
 OBSET 8.51 KHz  
 OBFIN 3.34 Hz  
 POINT 13107  
 FREQU 5882.35 Hz  
 SCANS 8  
 ACQTM 2.2282 sec  
 PD 5.0000 sec  
 PW1 5.22 usec  
 IRNUC 1H  
 CTEMP 50.2 c  
 SLVNT CDCL3  
 EXREF 7.26 ppm  
 BF 0.12 Hz  
 RGAIN 48

DFILE 2\_19YK692-TM-carbon-1-1.a  
 COMNT  
 DATIM 17-05-2019 11:01:46  
 OBNUC 13C  
 EXMOD carbon.jxp  
 OBFRQ 98.52 MHz  
 OBSET 4.64 KHz  
 OBFIN 8.74 Hz  
 POINT 26214  
 FREQU 24630.54 Hz  
 SCANS 360  
 ACQTM 1.0643 sec  
 PD 2.0000 sec  
 PW1 3.12 usec  
 IRNUC 1H  
 CTEMP 20.7 c  
 SLVNT CDCL3  
 EXREF 77.16 ppm  
 BF 1.20 Hz  
 RGAIN 60

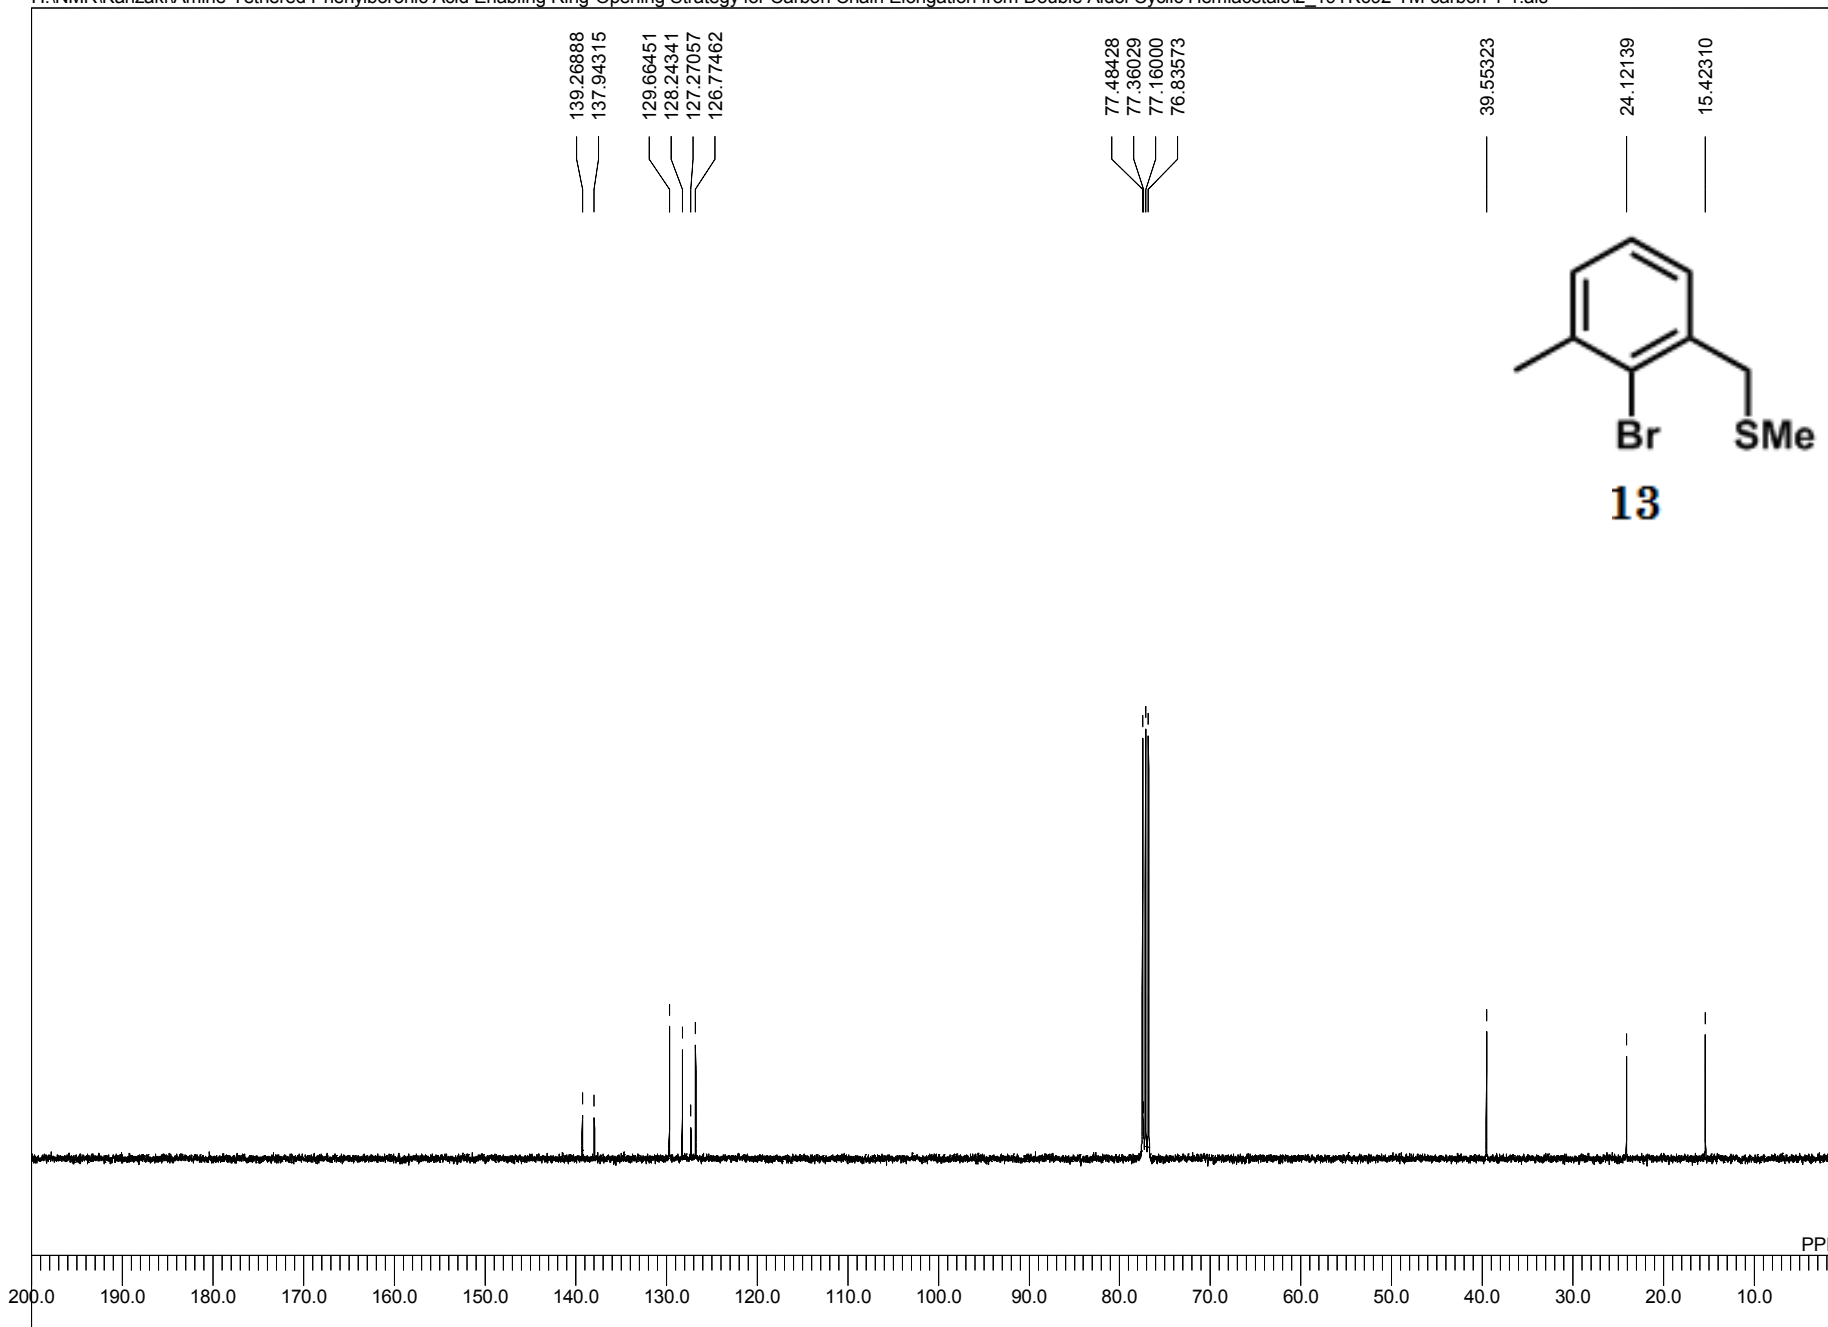

H:\NMR\Kanzaki\Amine-Tethered Phenylboronic Acid Enabling Ring-Opening Strategy for Carbon Chain Elongation from Double Aldol Cyclic Hemiacetals\3\_19YK-NMe2-Me-boronicacid-H-acetone-1-1.als

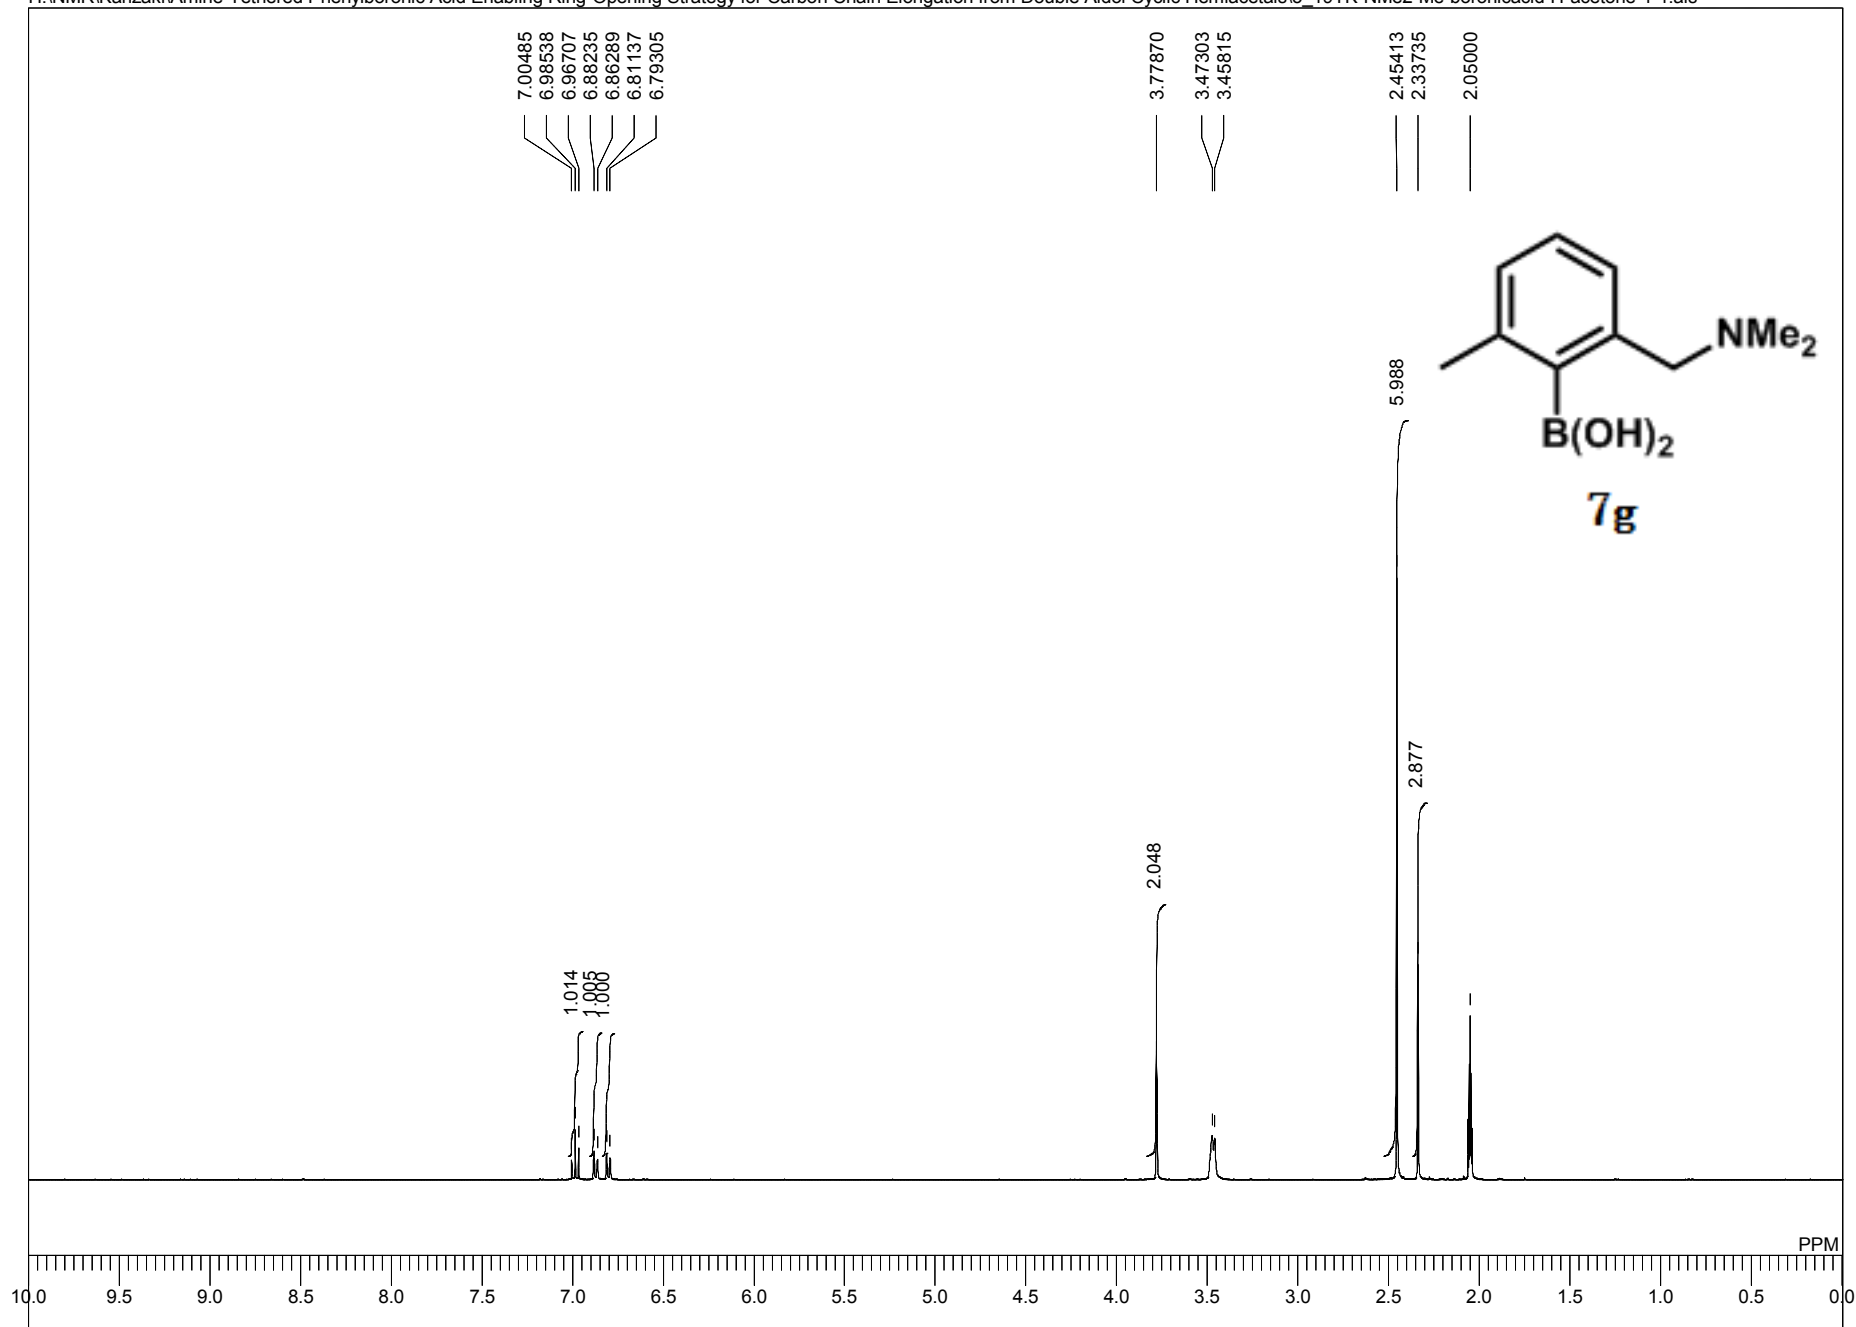

DFILE 3\_19YK-NMe2-Me-boronicacid  
 COMNT  
 DATIM 24-04-2019 20:45:34  
 OBNUC 1H  
 EXMOD proton.jpg  
 OBFRQ 391.78 MHz  
 OBSET 8.51 KHz  
 OBFIN 3.34 Hz  
 POINT 13107  
 FREQU 5878.90 Hz  
 SCANS 8  
 ACQTM 2.2295 sec  
 PD 5.0000 sec  
 PW1 5.17 usec  
 IRNUC 1H  
 CTEMP 20.6 c  
 SLVNT ACETN  
 EXREF 2.05 ppm  
 BF 0.12 Hz  
 RGAIN 44

H:\NMR\Kanzaki\Amine-Tethered Phenylboronic Acid Enabling Ring-Opening Strategy for Carbon Chain Elongation from Double Aldol Cyclic Hemiacetals\4\_19YK-NMe2-Me-boronicacid-C-acetone-1-1.als

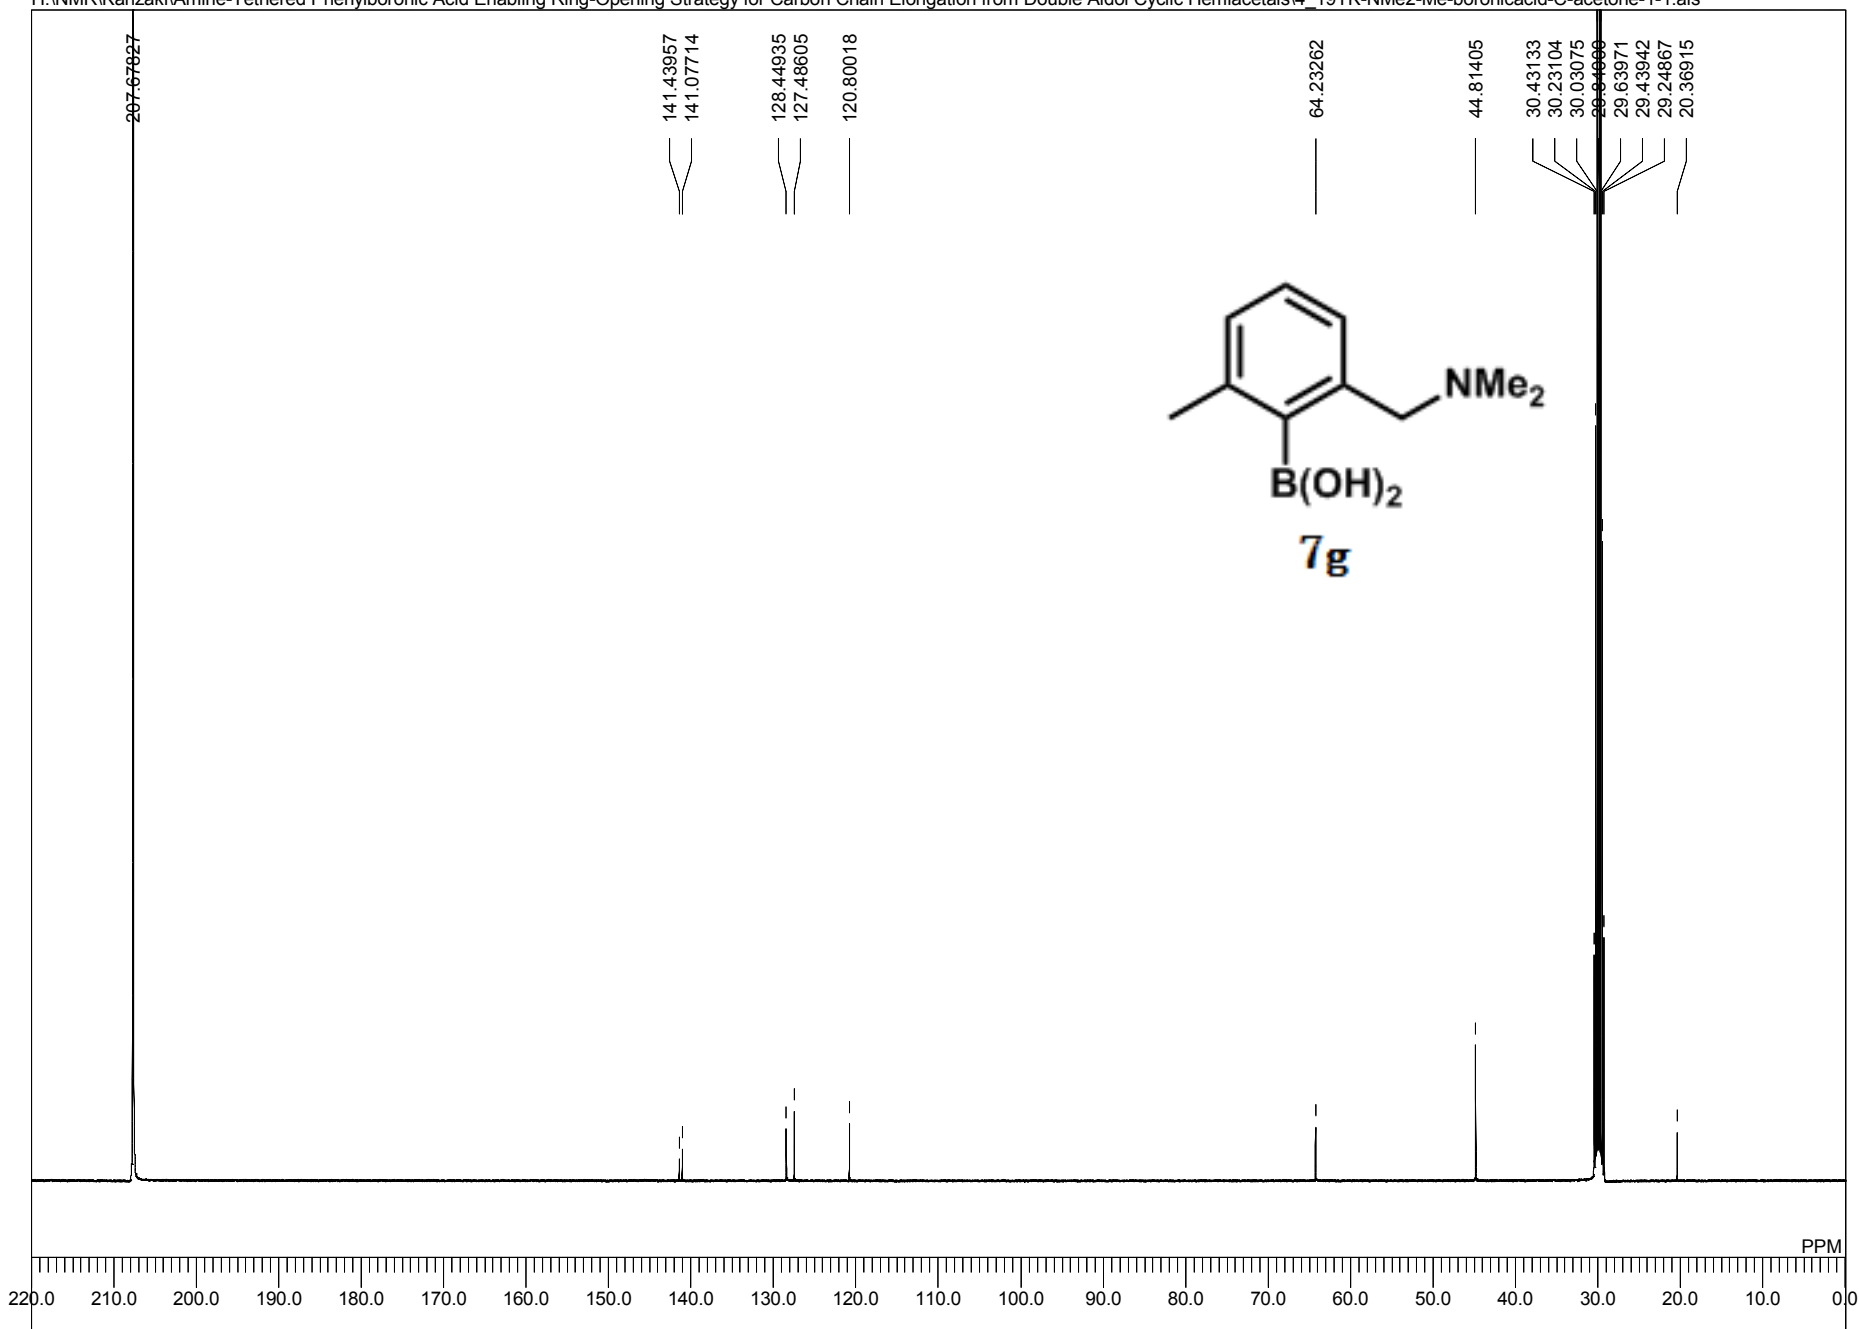

DFILE 4\_19YK-NMe2-Me-boronicacid  
 COMNT  
 DATIM 24-04-2019 20:57:22  
 OBNUC 13C  
 EXMOD carbon.jxp  
 OBFRQ 98.52 MHz  
 OBSET 4.64 KHz  
 OBFIN 8.74 Hz  
 POINT 26214  
 FREQU 24630.54 Hz  
 SCANS 14000  
 ACQTM 1.0643 sec  
 PD 2.0000 sec  
 PW1 3.12 usec  
 IRNUC 1H  
 CTEMP 20.4 c  
 SLVNT ACETN  
 EXREF 29.84 ppm  
 BF 1.20 Hz  
 RGAIN 60

H:\NMR\Kanzaki\Amine-Tethered Phenylboronic Acid Enabling Ring-Opening Strategy for Carbon Chain Elongation from Double Aldol Cyclic Hemiacetals\5\_synsynsynMeMe-1-1.als

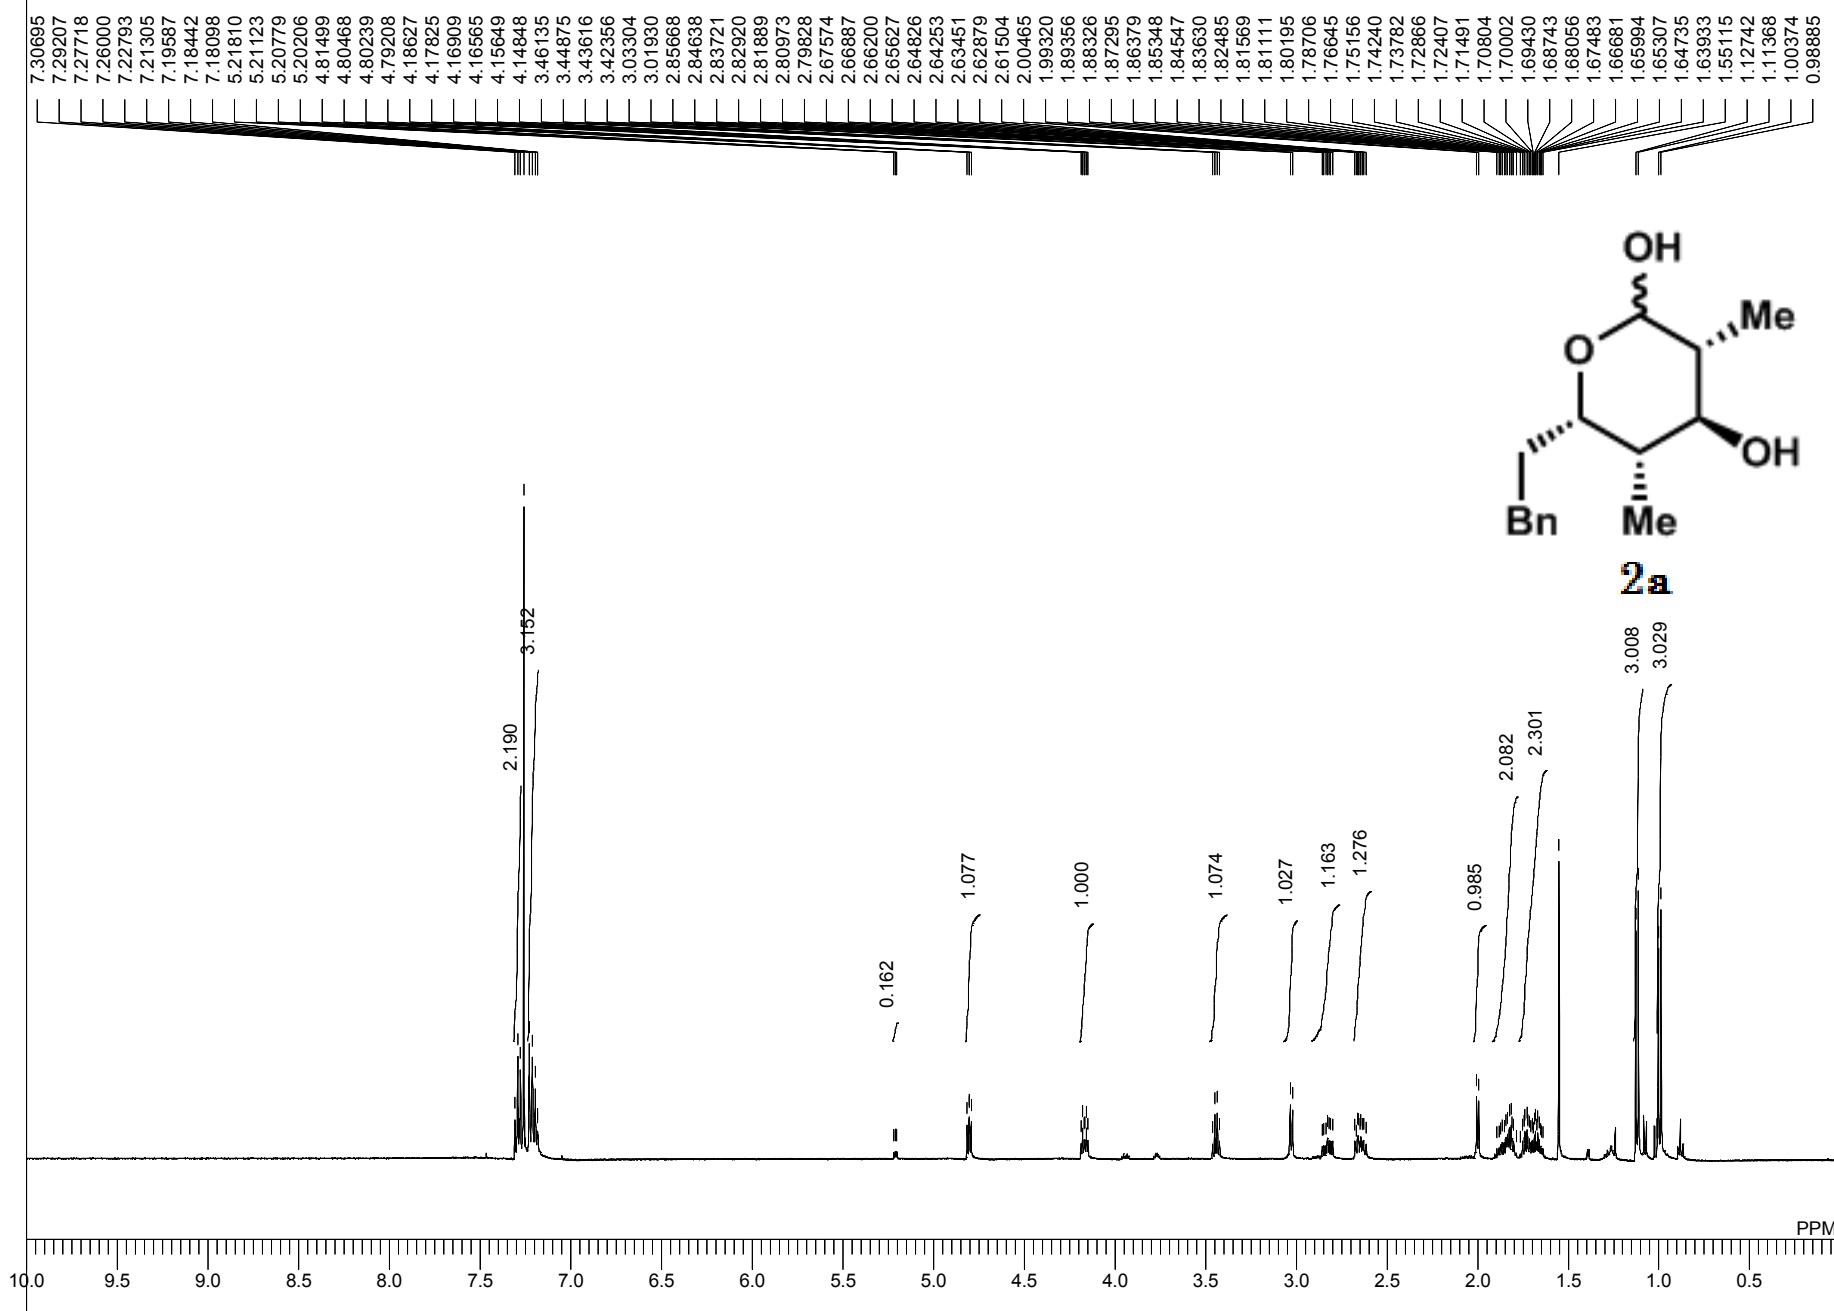

|       |                         |
|-------|-------------------------|
| DFILE | 5_synsynsynMeMe-1-1.als |
| COMNT |                         |
| DATIM | 2019-04-26 16:10:21     |
| OBNUC | <sup>1</sup> H          |
| EXMOD | proton.jxp              |
| OBFRQ | 500.16 MHz              |
| OBSET | 2.41 KHz                |
| OBFIN | 6.01 Hz                 |
| POINT | 13107                   |
| FREQU | 7507.51 Hz              |
| SCANS | 8                       |
| ACQTM | 1.7459 sec              |
| PD    | 6.0000 sec              |
| PW1   | 5.55 usec               |
| IRNUC | <sup>1</sup> H          |
| CTEMP | 21.4 c                  |
| SLVNT | CDCL <sub>3</sub>       |
| EXREF | 7.26 ppm                |
| BF    | 0.12 Hz                 |
| RGAIN | 40                      |

H:\NMR\Kanzaki\Amine-Tethered Phenylboronic Acid Enabling Ring-Opening Strategy for Carbon Chain Elongation from Double Aldol Cyclic Hemiacetals\6\_syn-syn-syn-me-me-carbon-1-1.als

DFILE 6\_syn-syn-syn-me-me-carbon-1-1.als  
 COMNT  
 DATIM 2019-04-26 16:11:56  
 OBNUC 13C  
 EXMOD carbon.jxp  
 OBFRQ 125.77 MHz  
 OBSET 7.87 KHz  
 OBFIN 4.21 Hz  
 POINT 26214  
 FREQU 31446.54 Hz  
 SCANS 1538  
 ACQTM 0.8336 sec  
 PD 2.0000 sec  
 PW1 3.40 usec  
 IRNUC 1H  
 CTEMP 22.1 c  
 SLVNT CDCL3  
 EXREF 77.16 ppm  
 BF 1.20 Hz  
 RGAIN 60

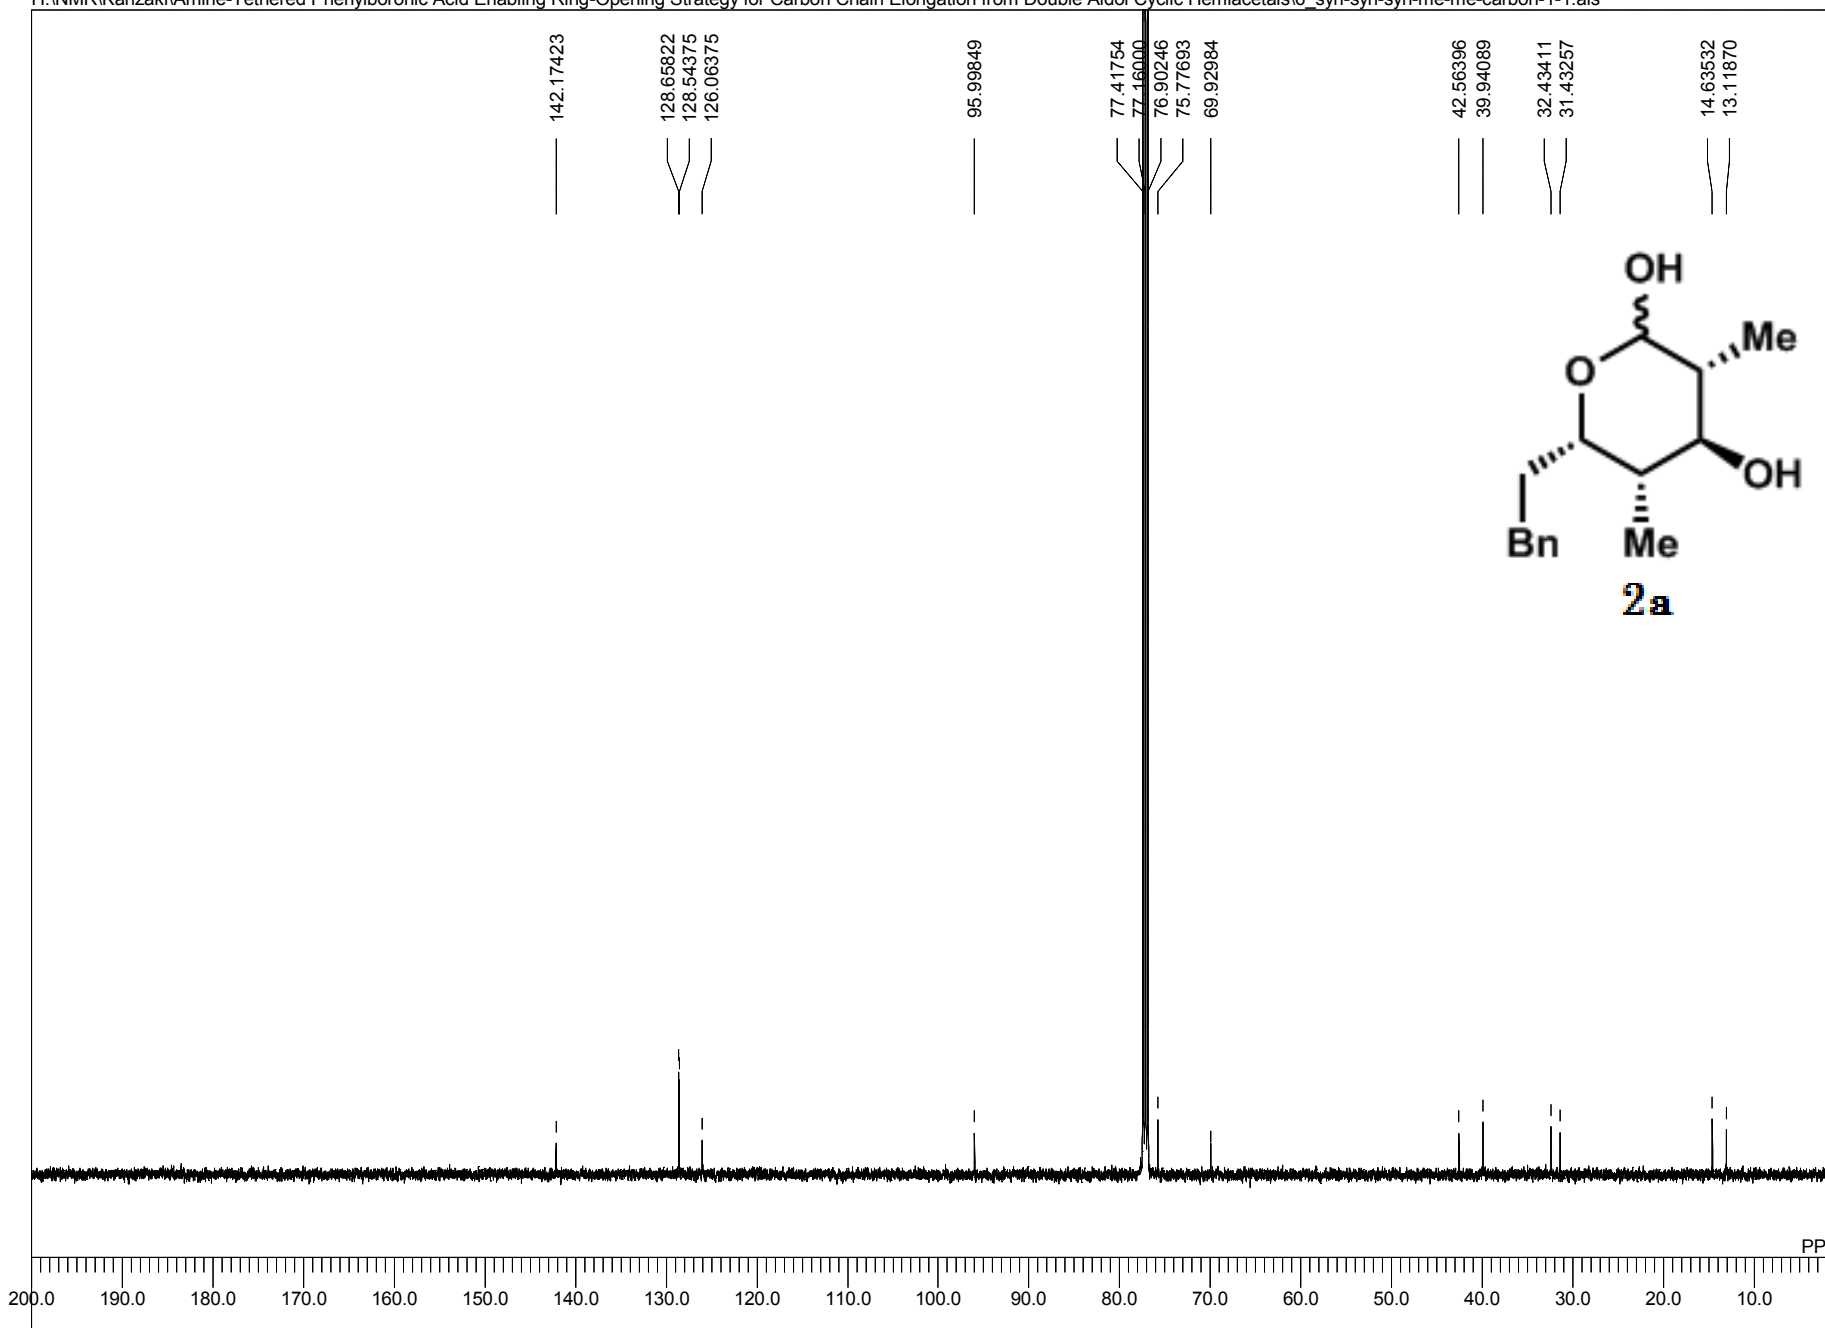



H:\NMR\Kanzaki\Amine-Tethered Phenylboronic Acid Enabling Ring-Opening Strategy for Carbon Chain Elongation from Double Aldol Cyclic Hemiacetals\7\_YH133-fra17-19-1-1.als

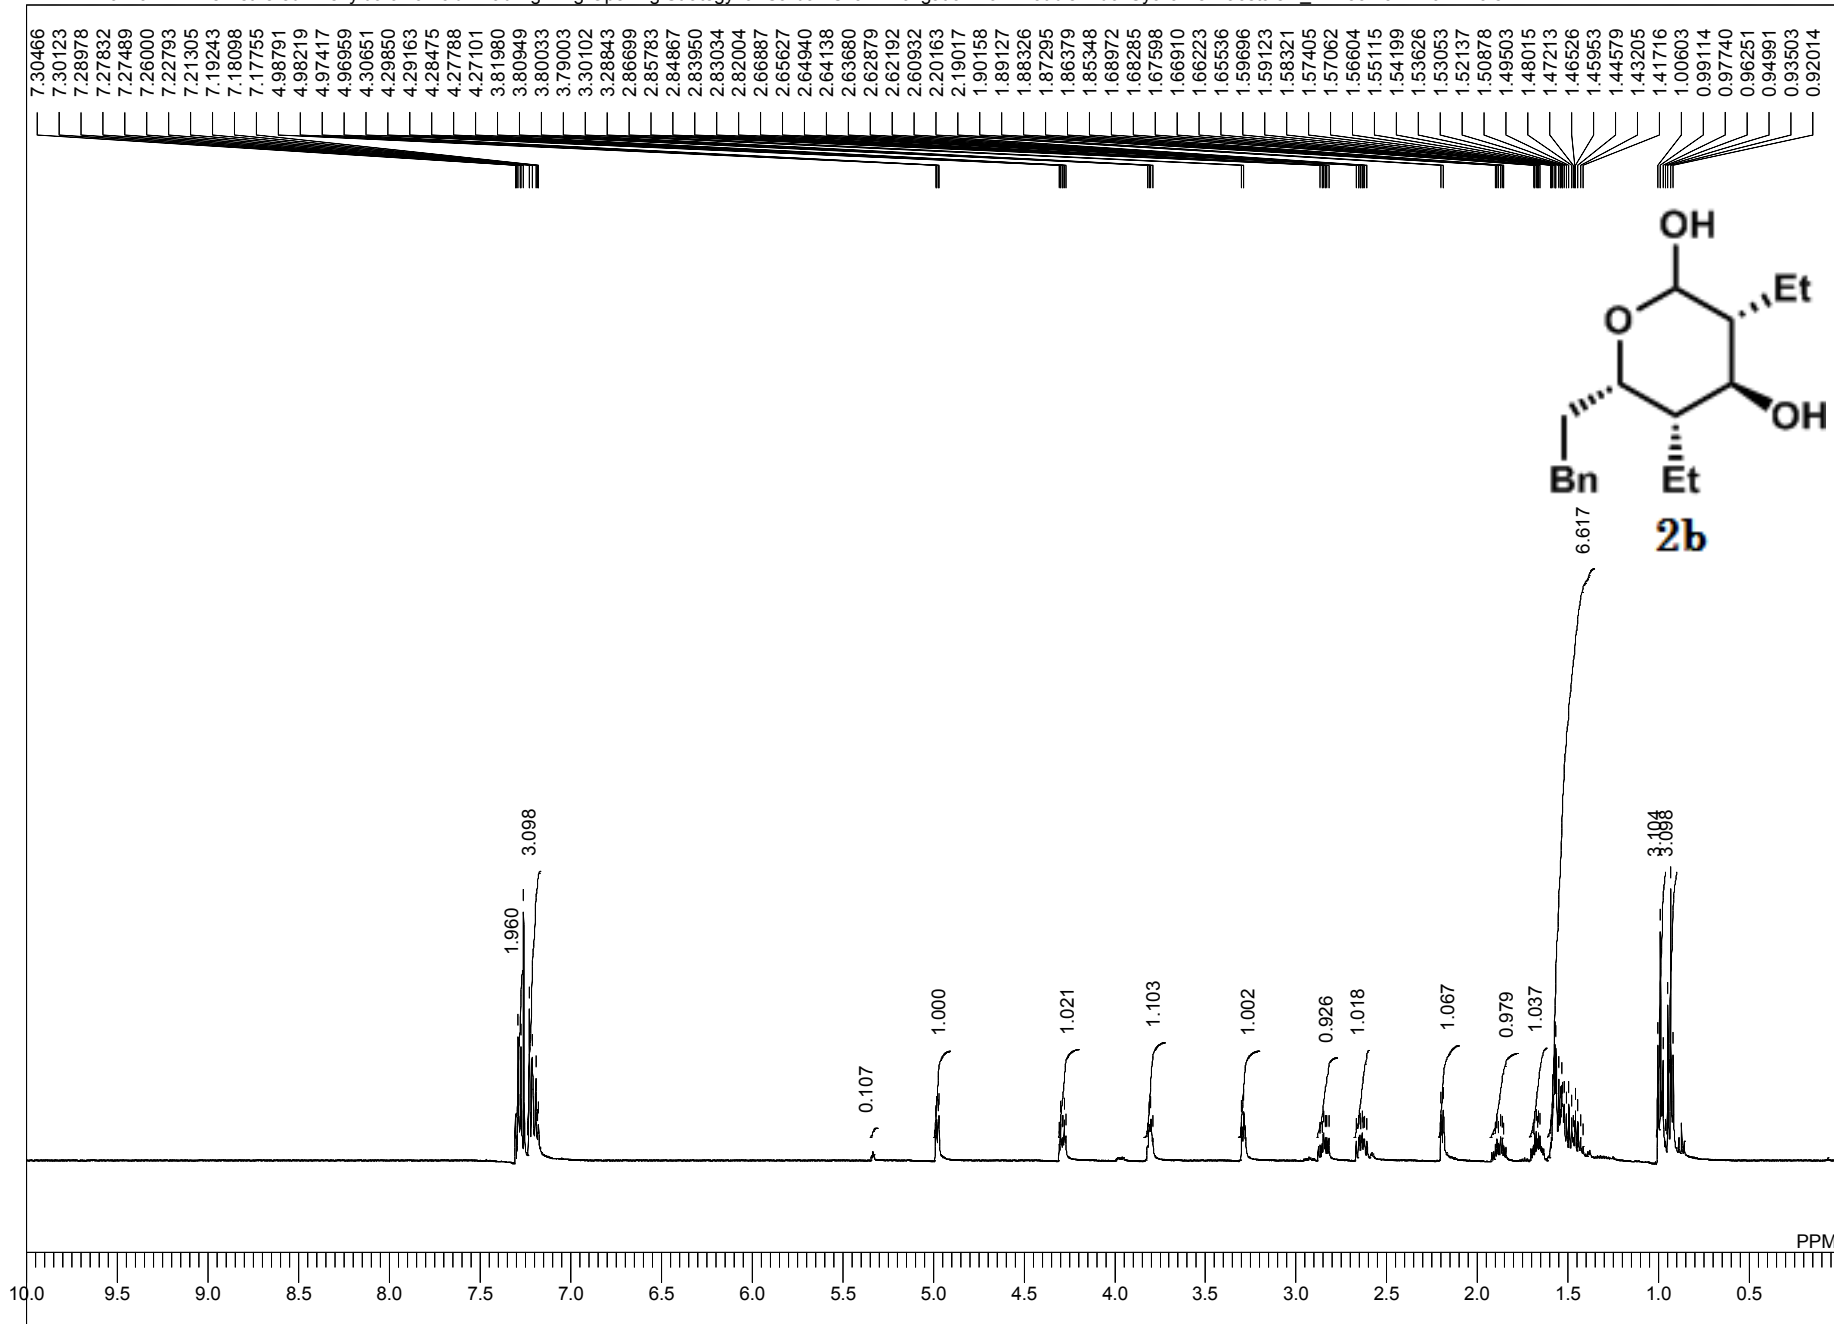

DFILE 7\_YH133-fra17-19-1-1.als  
 COMNT  
 DATIM 2019-03-14 19:30:42  
 OBNUC 1H  
 EXMOD proton.jpg  
 OBFRQ 500.16 MHz  
 OBSET 2.41 KHz  
 OBFIN 6.01 Hz  
 POINT 13107  
 FREQU 7507.51 Hz  
 SCANS 8  
 ACQTM 1.7459 sec  
 PD 6.0000 sec  
 PW1 5.55 usec  
 IRNUC 1H  
 CTEMP 21.5 c  
 SLVNT CDCL3  
 EXREF 7.26 ppm  
 BF 0.12 Hz  
 RGAIN 40

H:\NMR\Kanzaki\Amine-Tethered Phenylboronic Acid Enabling Ring-Opening Strategy for Carbon Chain Elongation from Double Aldol Cyclic Hemiacetals\8\_YH133-carbon-2-1.als

DFILE 8\_YH133-carbon-2-1.als  
 COMNT  
 DATIM 2019-03-14 17:05:56  
 OBNUC 13C  
 EXMOD carbon.jxp  
 OBFRQ 125.77 MHz  
 OBSET 7.87 KHz  
 OBFIN 4.21 Hz  
 POINT 26214  
 FREQU 31446.54 Hz  
 SCANS 3000  
 ACQTM 0.8336 sec  
 PD 2.0000 sec  
 PW1 3.40 usec  
 IRNUC 1H  
 CTEMP 21.9 c  
 SLVNT CDCL3  
 EXREF 77.16 ppm  
 BF 1.20 Hz  
 RGAIN 60

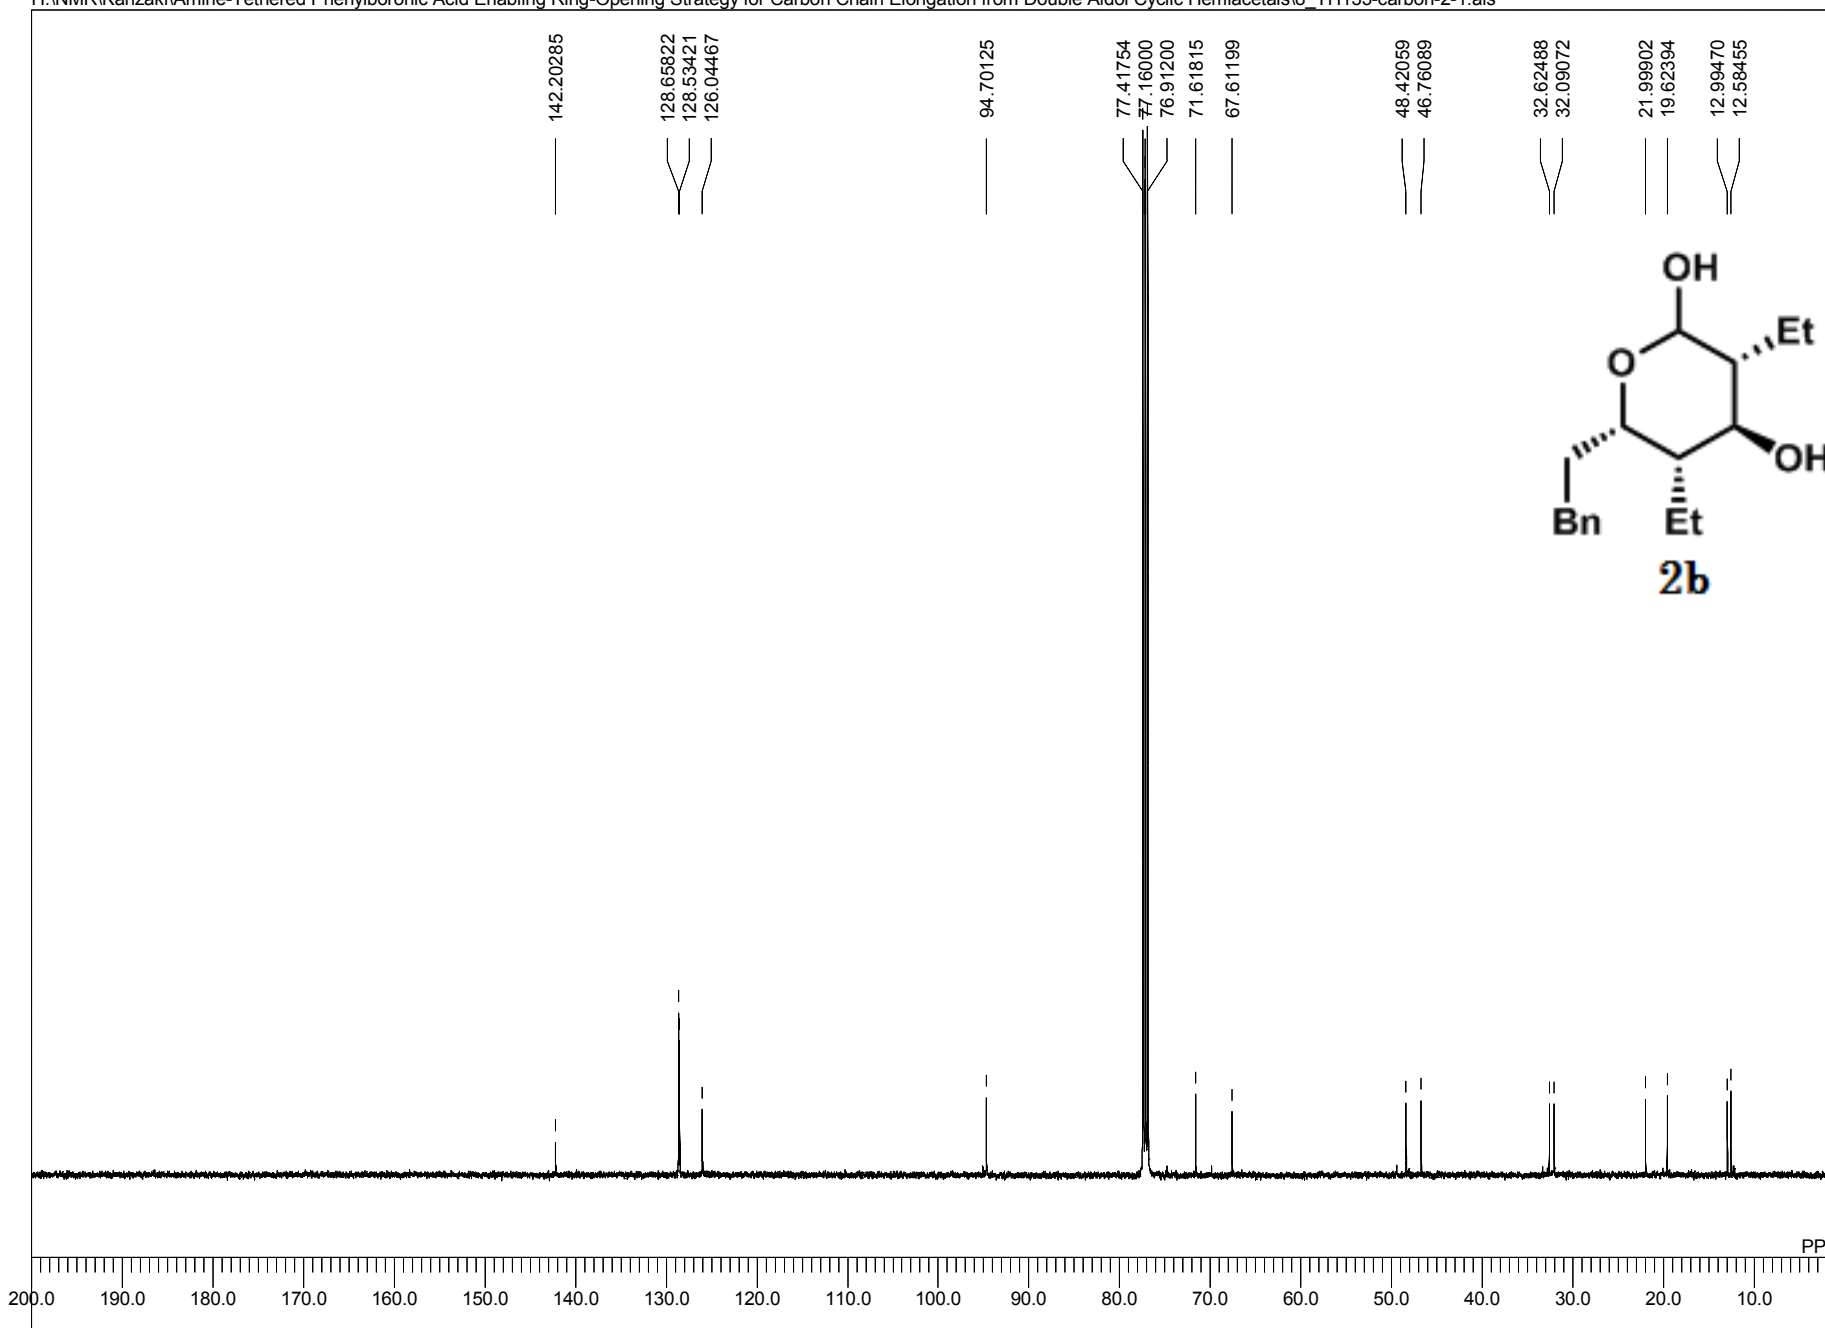

H:\NMR\Kanzaki\Amine-Tethered Phenylboronic Acid Enabling Ring-Opening Strategy for Carbon Chain Elongation from Double Aldol Cyclic Hemiacetals\9\_2\_YH140-20190318-1-1.als

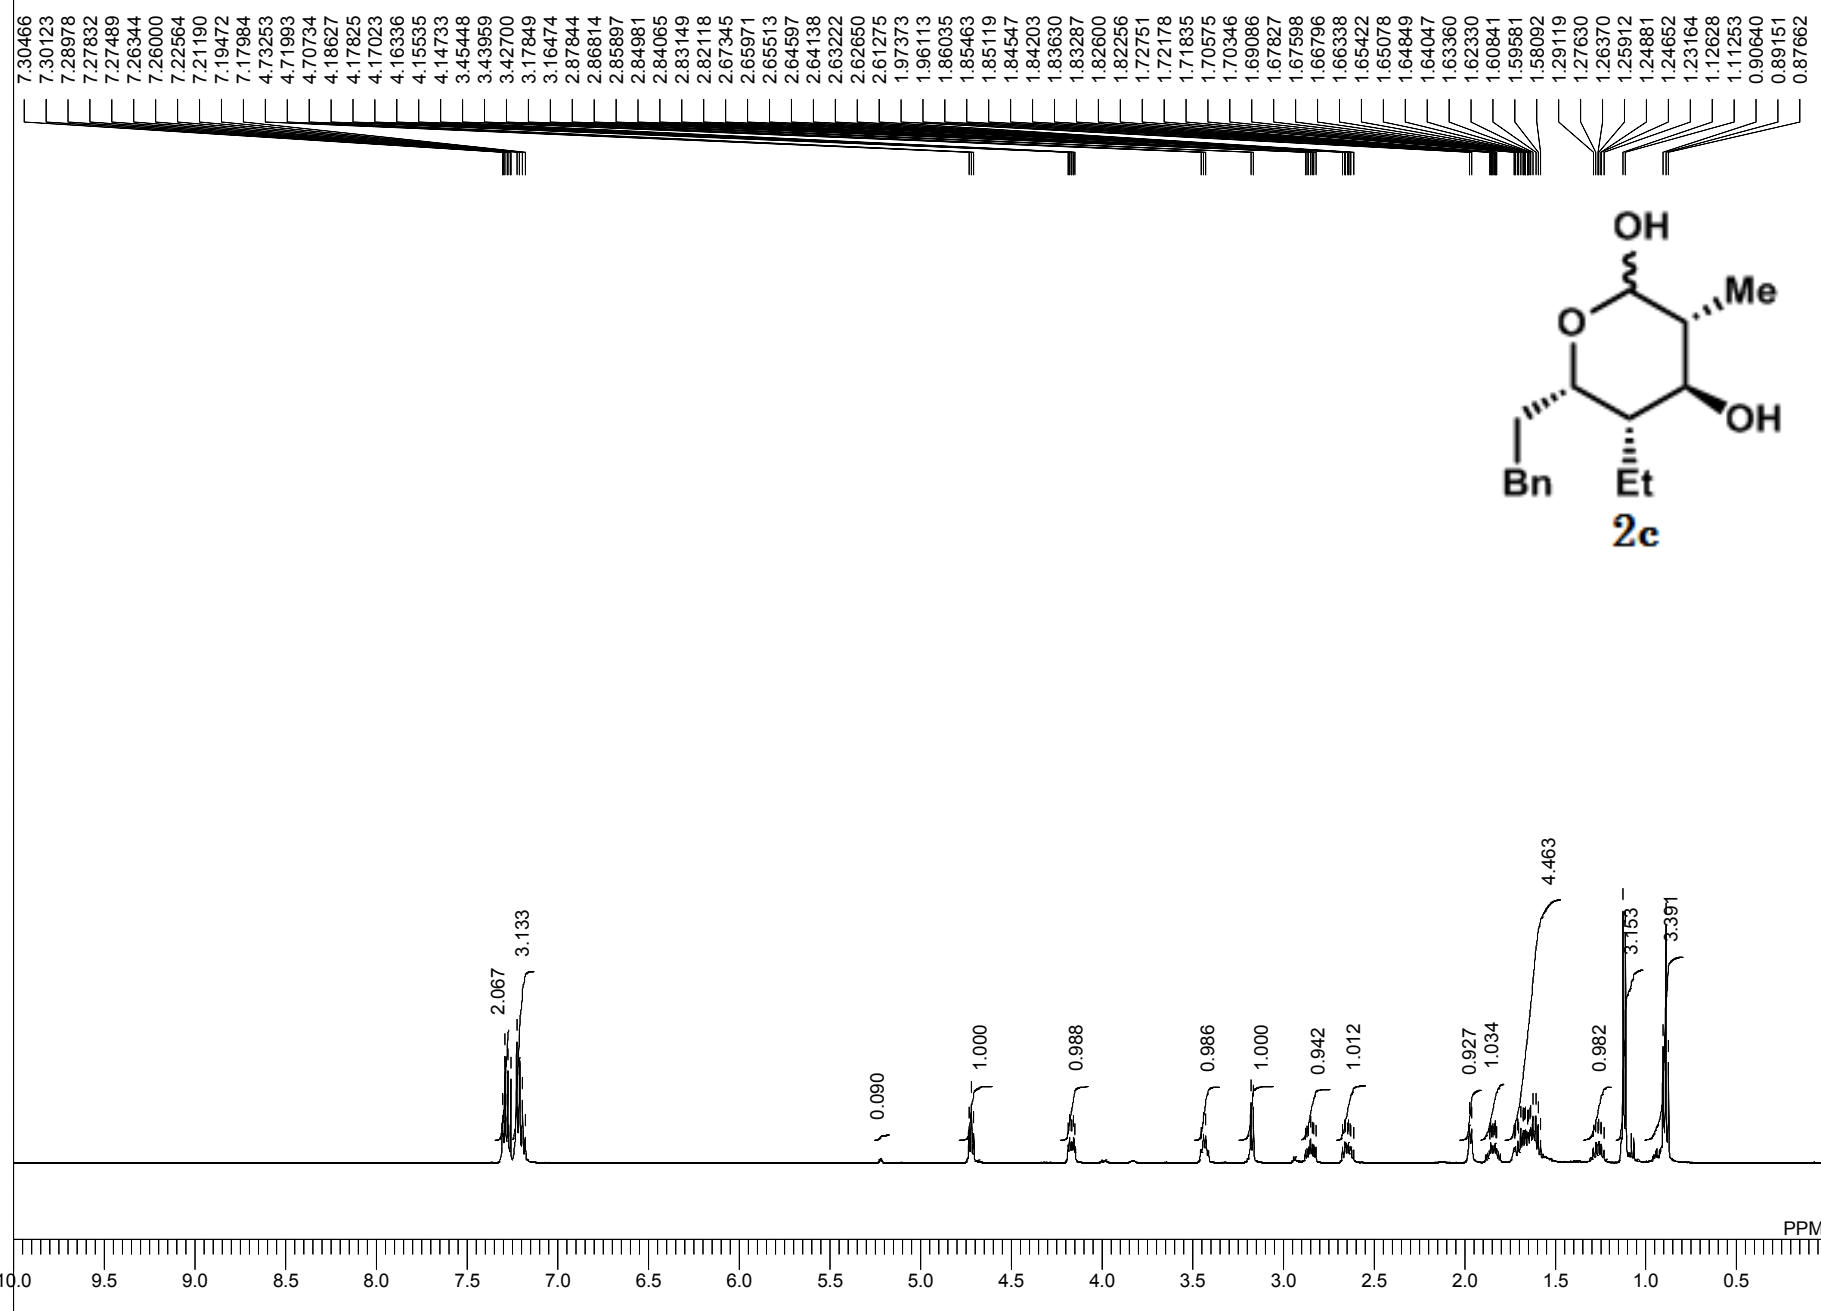

|       |                            |
|-------|----------------------------|
| DFILE | 9_2_YH140-20190318-1-1.als |
| COMNT |                            |
| DATIM | 2019-03-18 19:04:04        |
| OBNUC | 1H                         |
| EXMOD | proton.jpg                 |
| OBFRQ | 500.16 MHz                 |
| OBSET | 2.41 KHz                   |
| OBFIN | 6.01 Hz                    |
| POINT | 13107                      |
| FREQU | 7507.51 Hz                 |
| SCANS | 8                          |
| ACQTM | 1.7459 sec                 |
| PD    | 6.0000 sec                 |
| PW1   | 5.55 usec                  |
| IRNUC | 1H                         |
| CTEMP | 21.5 c                     |
| SLVNT | CDCL3                      |
| EXREF | 7.26 ppm                   |
| BF    | 0.12 Hz                    |
| RGAIN | 34                         |

H:\NMR\Kanzaki\Amine-Tethered Phenylboronic Acid Enabling Ring-Opening Strategy for Carbon Chain Elongation from Double Aldol Cyclic Hemiacetals\10\_YH140-carbon-20190318-1-1.als

DFILE 10\_YH140-carbon-20190318  
 COMNT  
 DATIM 2019-03-18 19:07:10  
 OBNUC 13C  
 EXMOD carbon.jxp  
 OBFRQ 125.77 MHz  
 OBSET 7.87 KHz  
 OBFIN 4.21 Hz  
 POINT 26214  
 FREQU 31446.54 Hz  
 SCANS 272  
 ACQTM 0.8336 sec  
 PD 2.0000 sec  
 PW1 3.40 usec  
 IRNUC 1H  
 CTEMP 22.0 c  
 SLVNT CDCL3  
 EXREF 77.16 ppm  
 BF 1.20 Hz  
 RGAIN 60

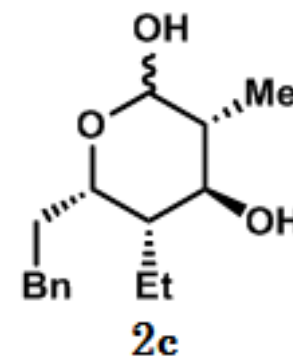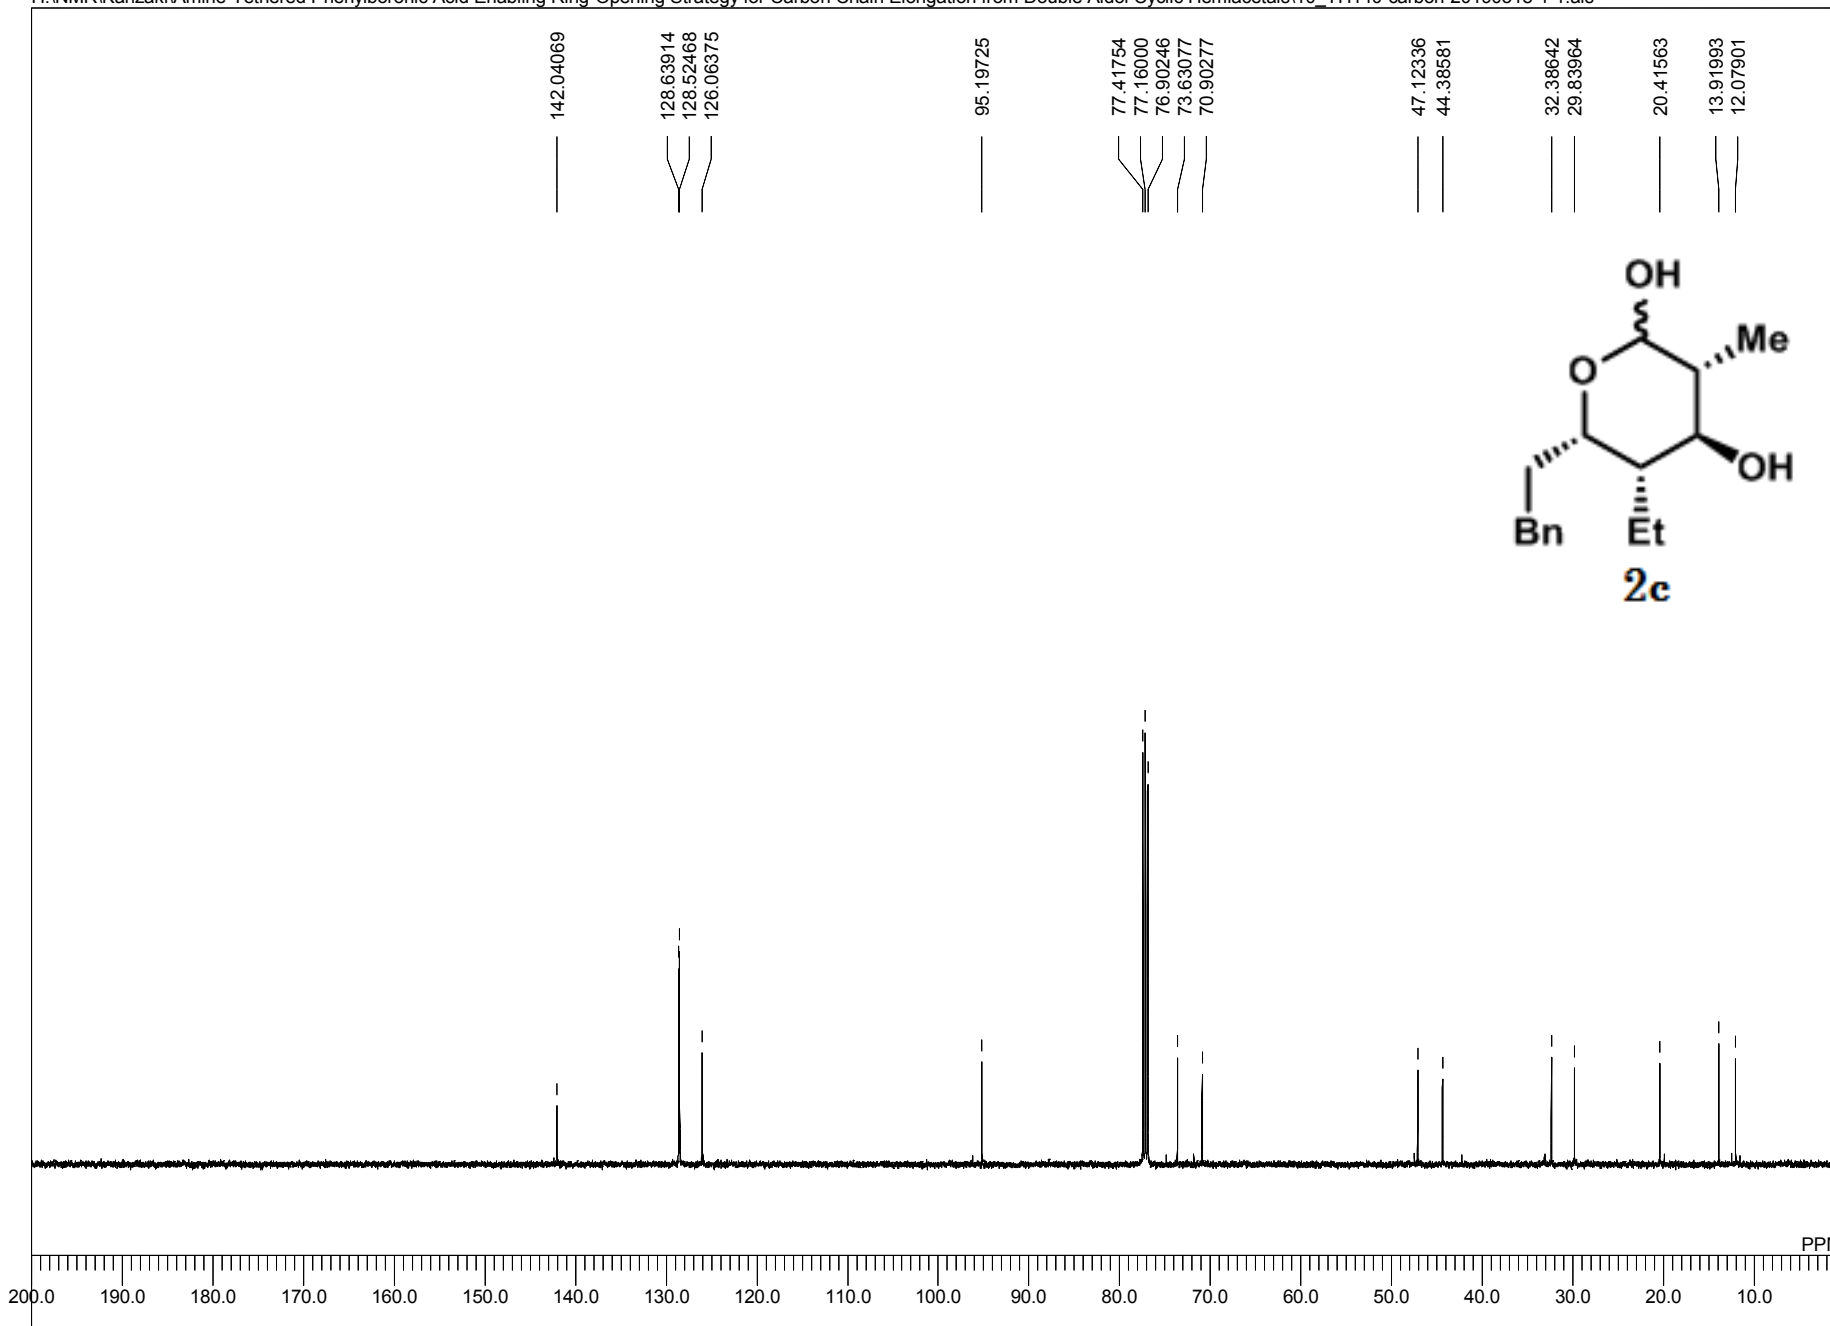

H:\NMR\Kanzaki\Amine-Tethered Phenylboronic Acid Enabling Ring-Opening Strategy for Carbon Chain Elongation from Double Aldol Cyclic Hemiacetals\11\_aldehyde\_lactol-Ph-Et-1-1.als

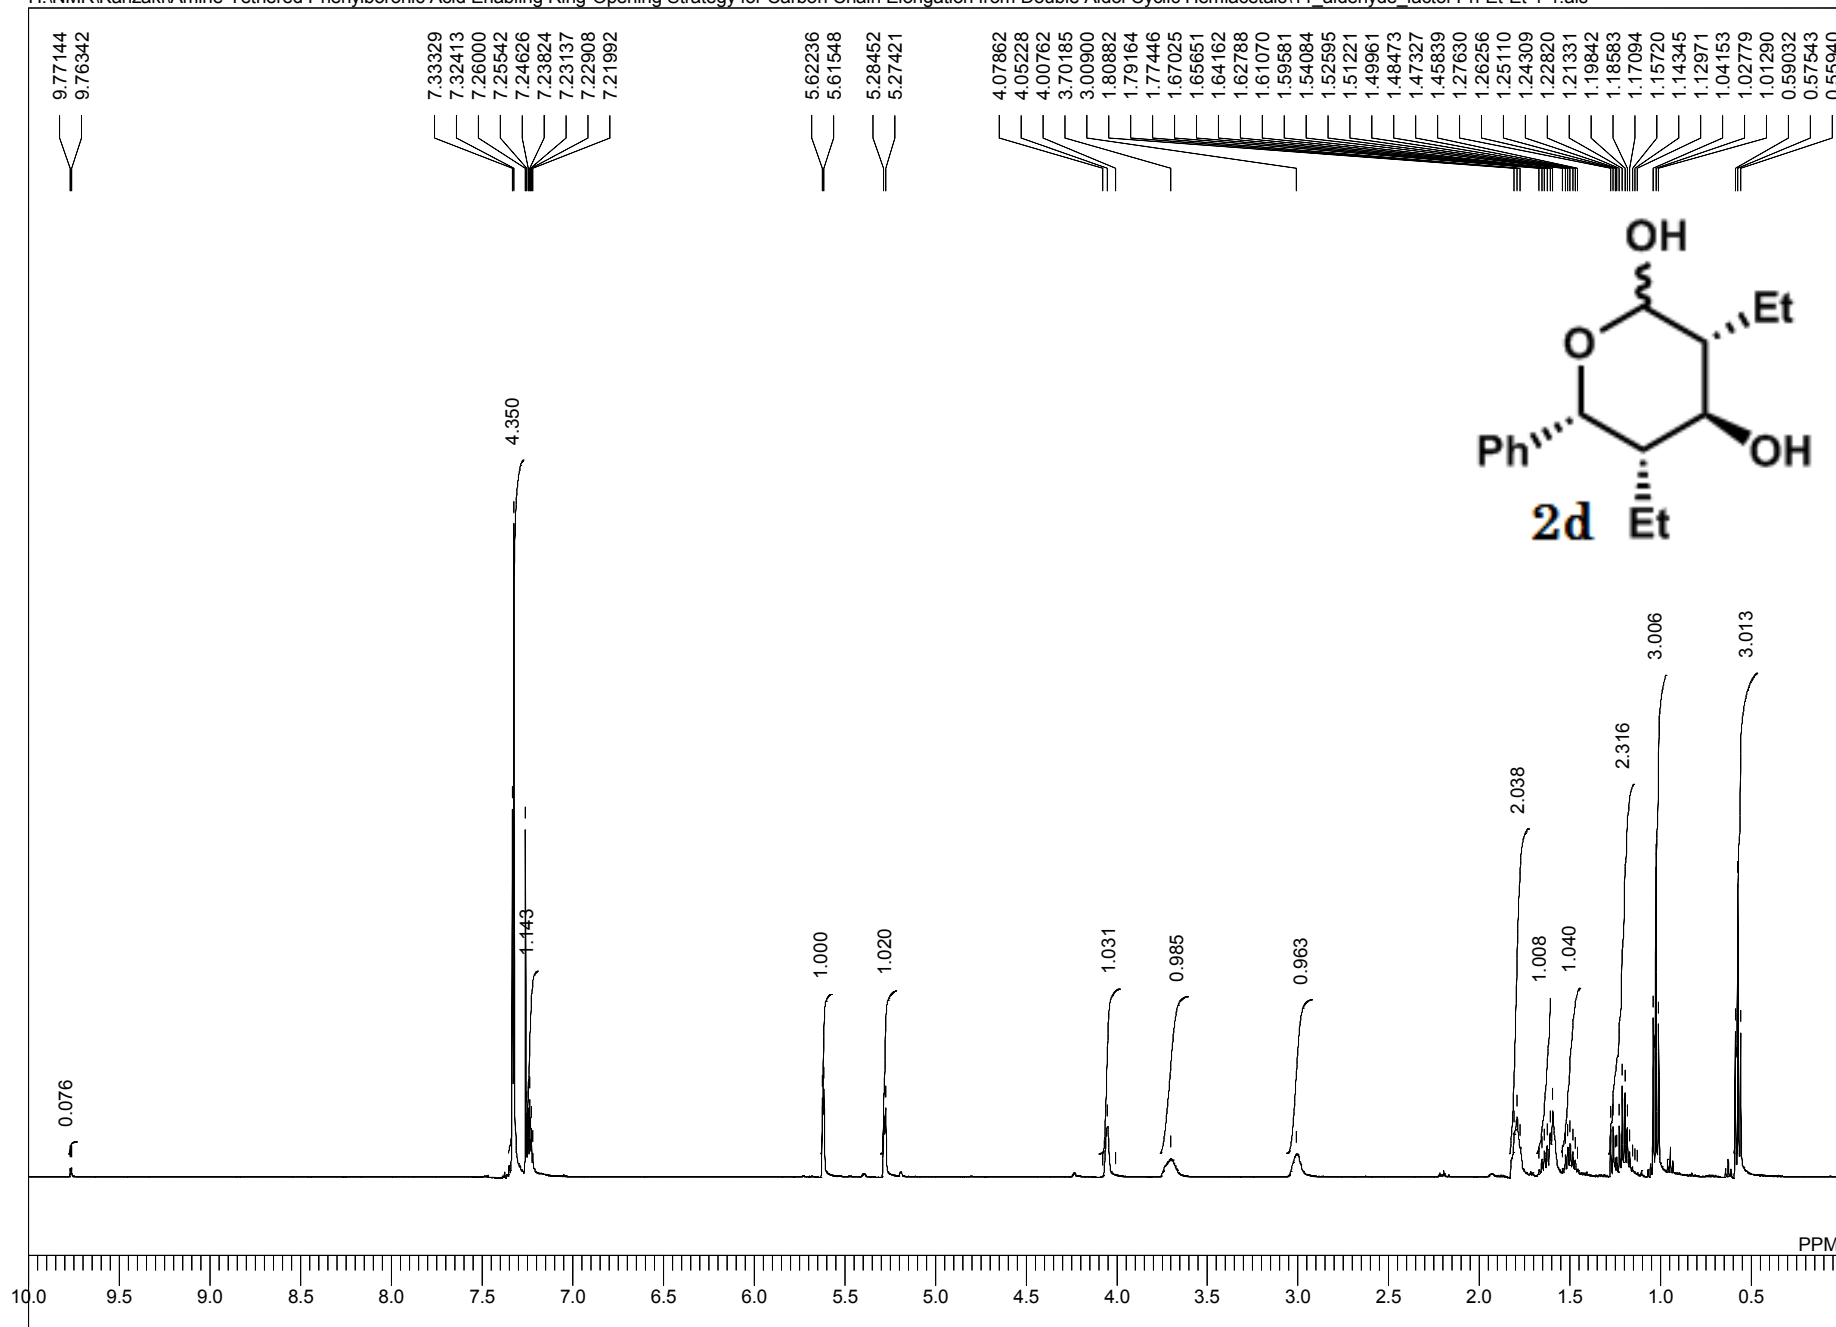

DFILE 11\_aldehyde\_lactol-Ph-Et-  
 COMNT  
 DATIM 2019-05-20 21:57:43  
 OBNUC 1H  
 EXMOD proton.jpg  
 OBFRQ 500.16 MHz  
 OBSET 2.41 KHz  
 OBFIN 6.01 Hz  
 POINT 13107  
 FREQU 7507.51 Hz  
 SCANS 8  
 ACQTM 1.7459 sec  
 PD 6.0000 sec  
 PW1 5.55 usec  
 IRNUC 1H  
 CTEMP 21.7 c  
 SLVNT CDCL3  
 EXREF 7.26 ppm  
 BF 0.12 Hz  
 RGAIN 38

H:\NMR\Kanzaki\Amine-Tethered Phenylboronic Acid Enabling Ring-Opening Strategy for Carbon Chain Elongation from Double Aldol Cyclic Hemiacetals\12\_lactol-Ph-Et-Et-carbon-1-1.als

DFILE 12\_lactol-Ph-Et-Et-carbon-1-  
 COMNT  
 DATIM 2019-05-20 22:07:21  
 OBNUC 13C  
 EXMOD carbon.jxp  
 OBFRQ 125.77 MHz  
 OBSET 7.87 KHz  
 OBFIN 4.21 Hz  
 POINT 26214  
 FREQU 31446.54 Hz  
 SCANS 13000  
 ACQTM 0.8336 sec  
 PD 2.0000 sec  
 PW1 3.40 usec  
 IRNUC 1H  
 CTEMP 22.4 c  
 SLVNT CDCL3  
 EXREF 77.16 ppm  
 BF 1.20 Hz  
 RGAIN 60

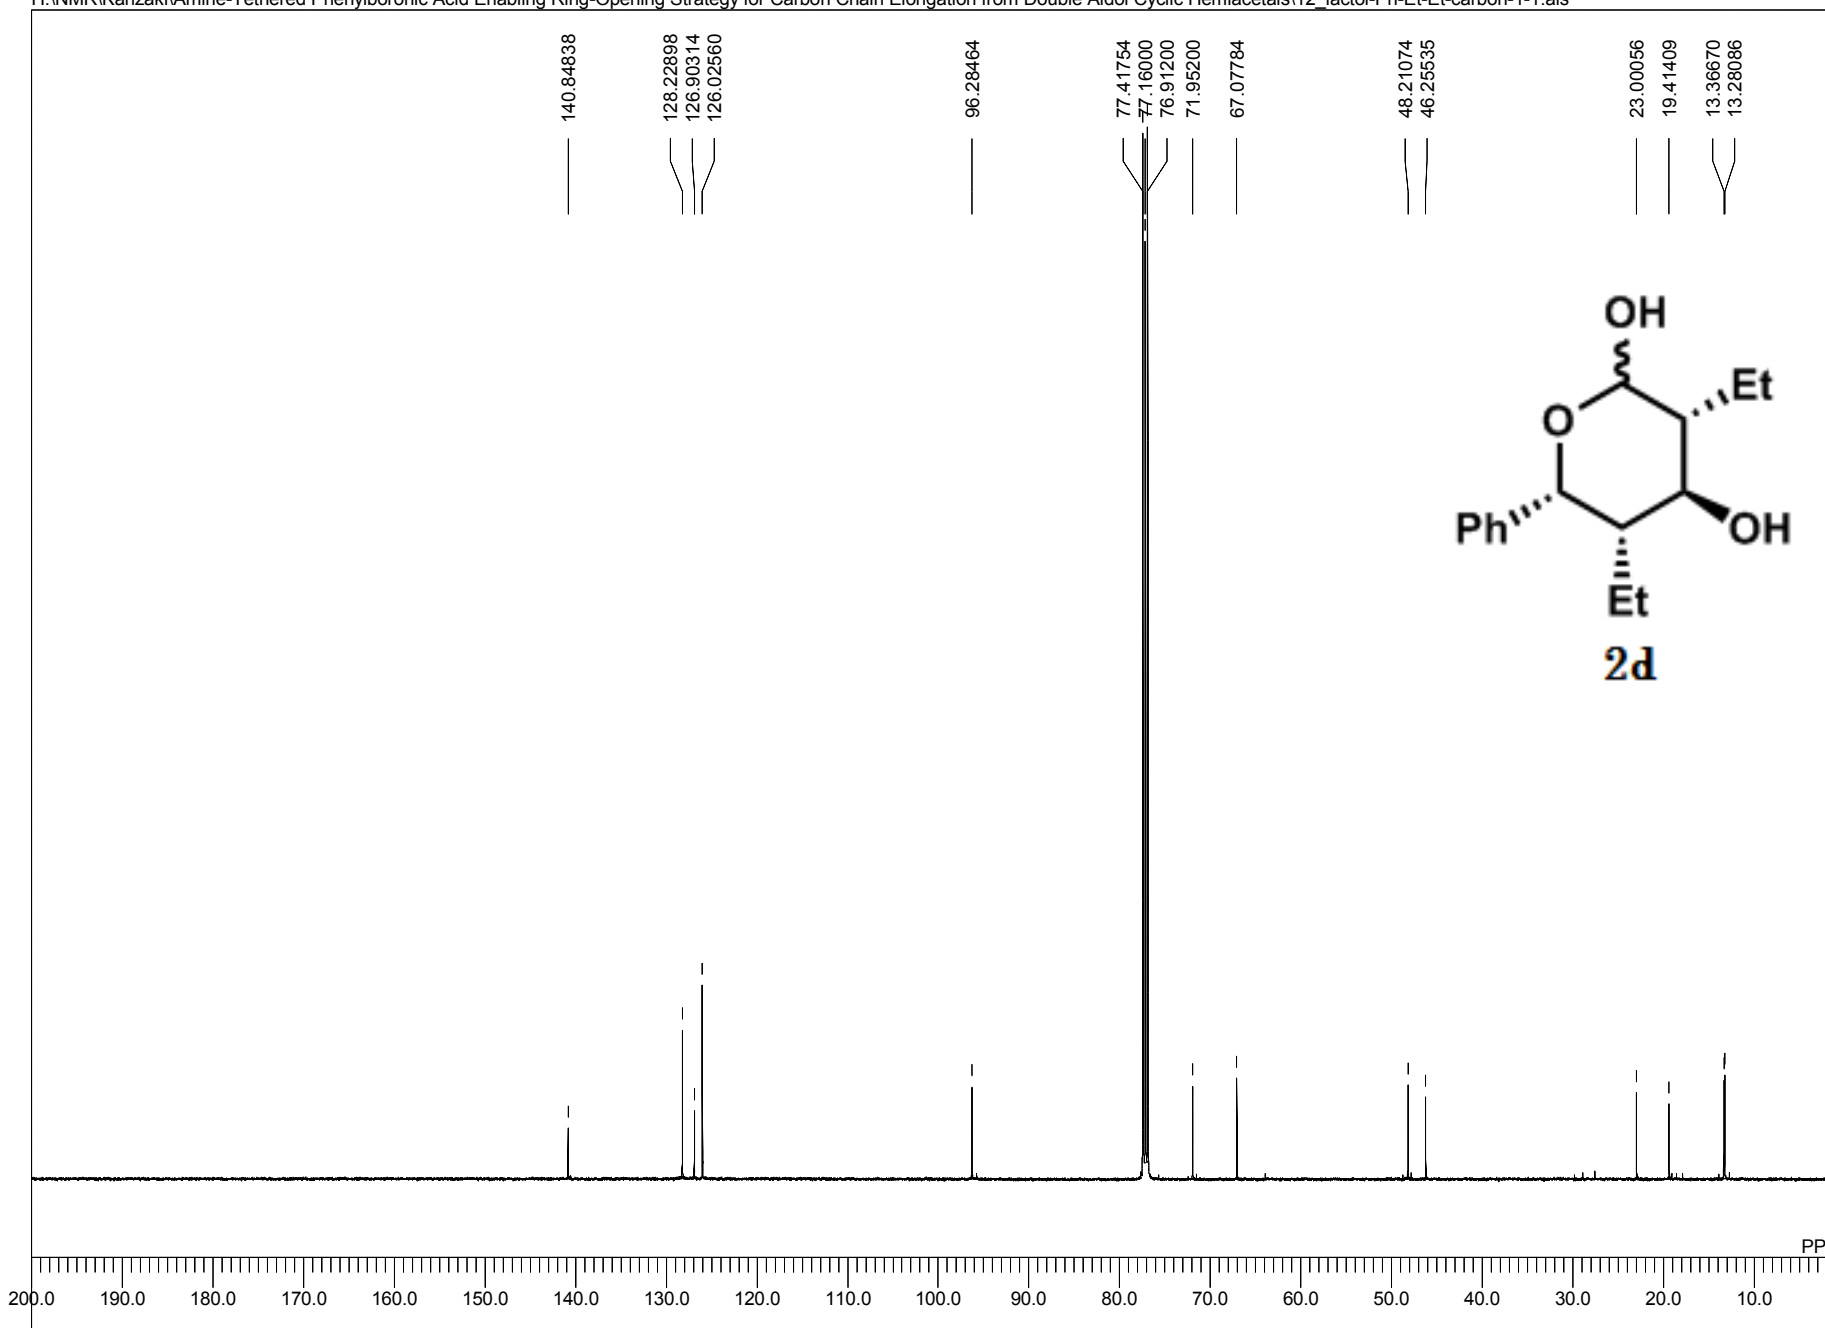

H:\NMR\Kanzaki\Amine-Tethered Phenylboronic Acid Enabling Ring-Opening Strategy for Carbon Chain Elongation from Double Aldol Cyclic Hemiacetals\13\_YH139-20180318-1-1.als

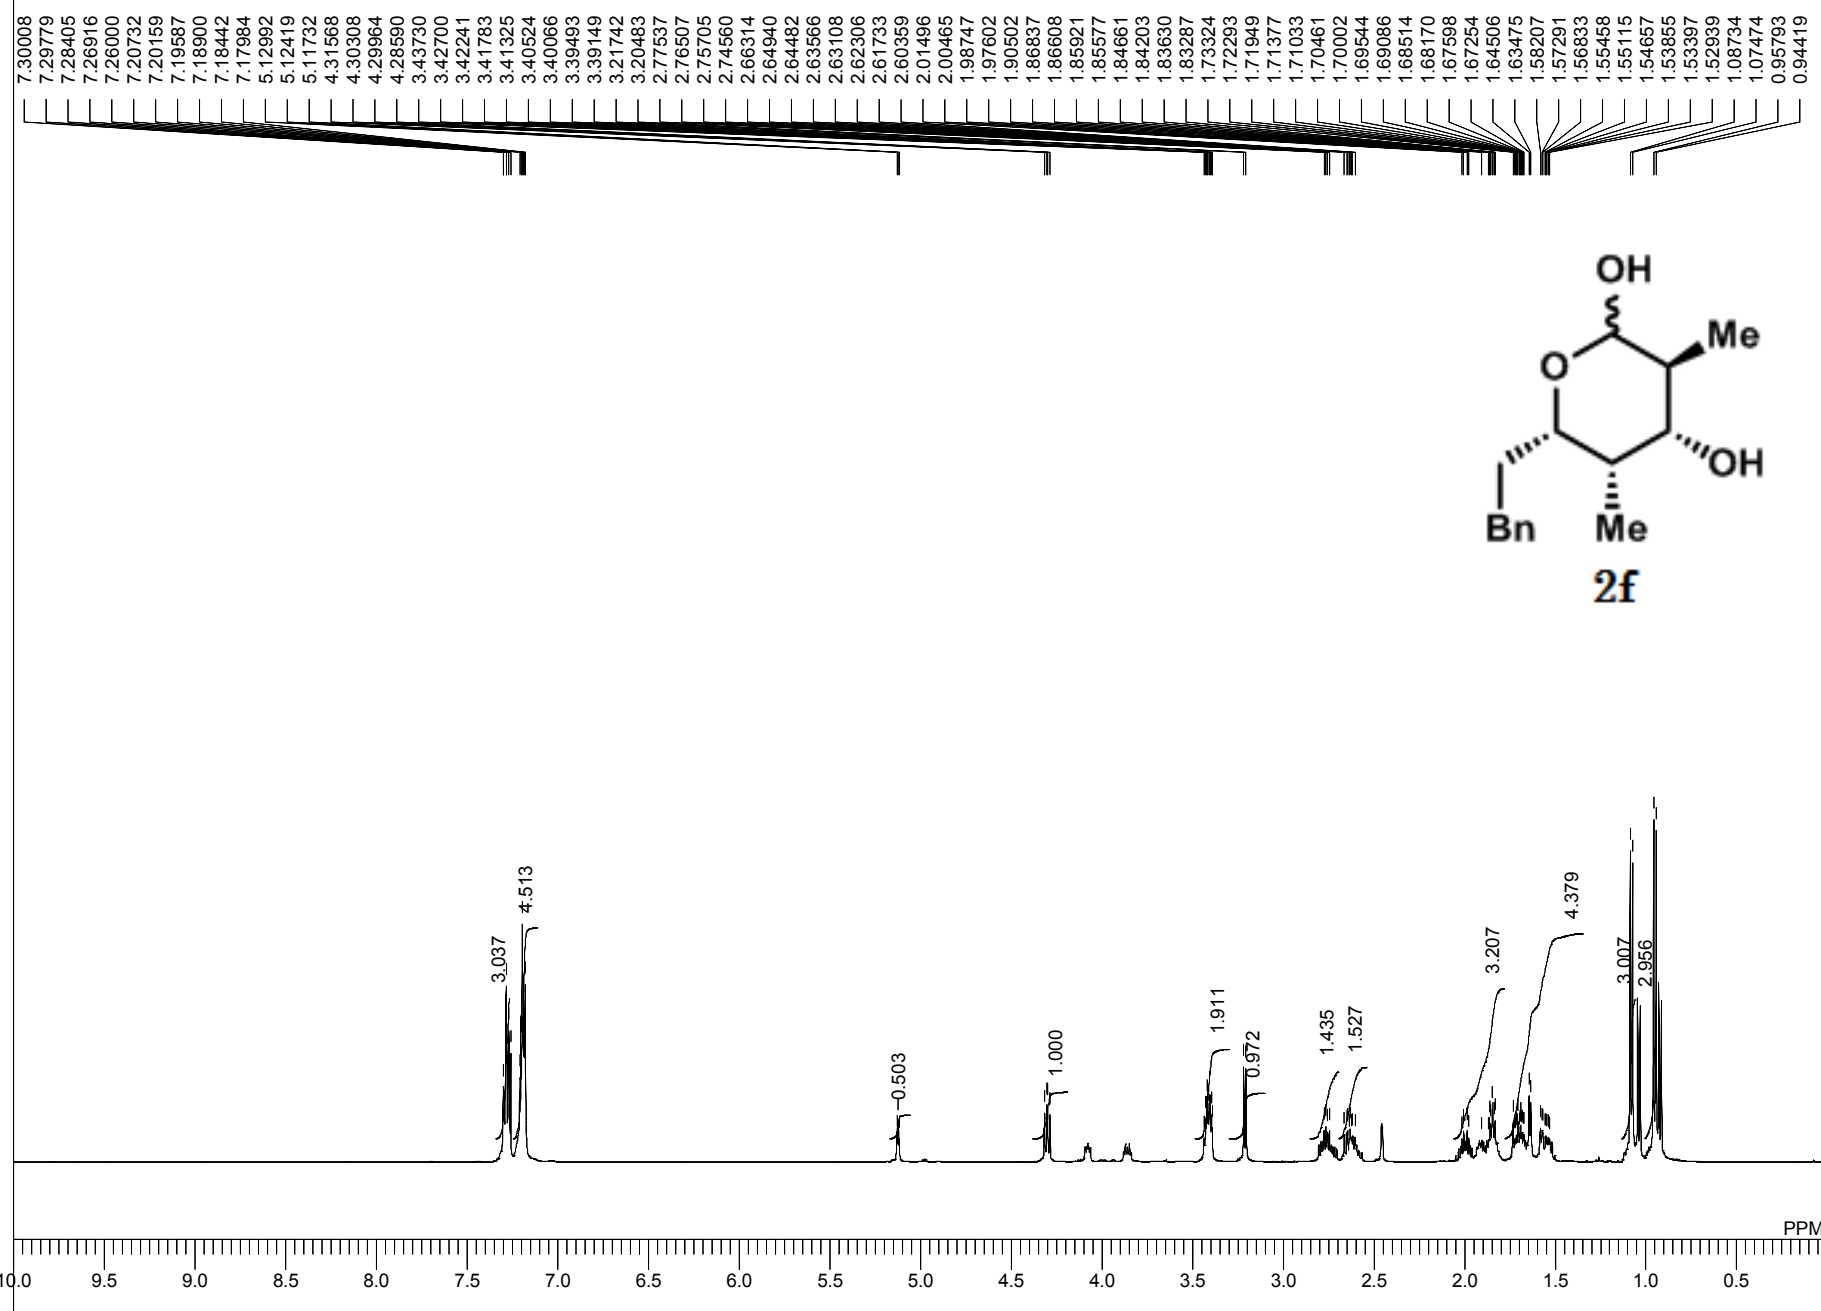

|       |                           |
|-------|---------------------------|
| DFILE | 13_YH139-20180318-1-1.als |
| COMNT |                           |
| DATIM | 2019-03-18 20:10:57       |
| OBNUC | <sup>1</sup> H            |
| EXMOD | proton.jxp                |
| OBFRQ | 500.16 MHz                |
| OBSET | 2.41 KHz                  |
| OBFIN | 6.01 Hz                   |
| POINT | 13107                     |
| FREQU | 7507.51 Hz                |
| SCANS | 8                         |
| ACQTM | 1.7459 sec                |
| PD    | 6.0000 sec                |
| PW1   | 5.55 usec                 |
| IRNUC | <sup>1</sup> H            |
| CTEMP | 21.6 c                    |
| SLVNT | CDCL <sub>3</sub>         |
| EXREF | 7.26 ppm                  |
| BF    | 0.12 Hz                   |
| RGAIN | 34                        |

H:\NMR\Kanzaki\Amine-Tethered Phenylboronic Acid Enabling Ring-Opening Strategy for Carbon Chain Elongation from Double Aldol Cyclic Hemiacetals\14\_YH139-carbon-20190318-1-1.als

DFILE 14\_YH139-carbon-20190318  
 COMNT  
 DATIM 2019-03-18 20:12:55  
 OBNUC 13C  
 EXMOD carbon.jxp  
 OBFRQ 125.77 MHz  
 OBSET 7.87 KHz  
 OBFIN 4.21 Hz  
 POINT 26214  
 FREQU 31446.54 Hz  
 SCANS 345  
 ACQTM 0.8336 sec  
 PD 2.0000 sec  
 PW1 3.40 usec  
 IRNUC 1H  
 CTEMP 22.0 c  
 SLVNT CDCL3  
 EXREF 77.16 ppm  
 BF 1.20 Hz  
 RGAIN 60

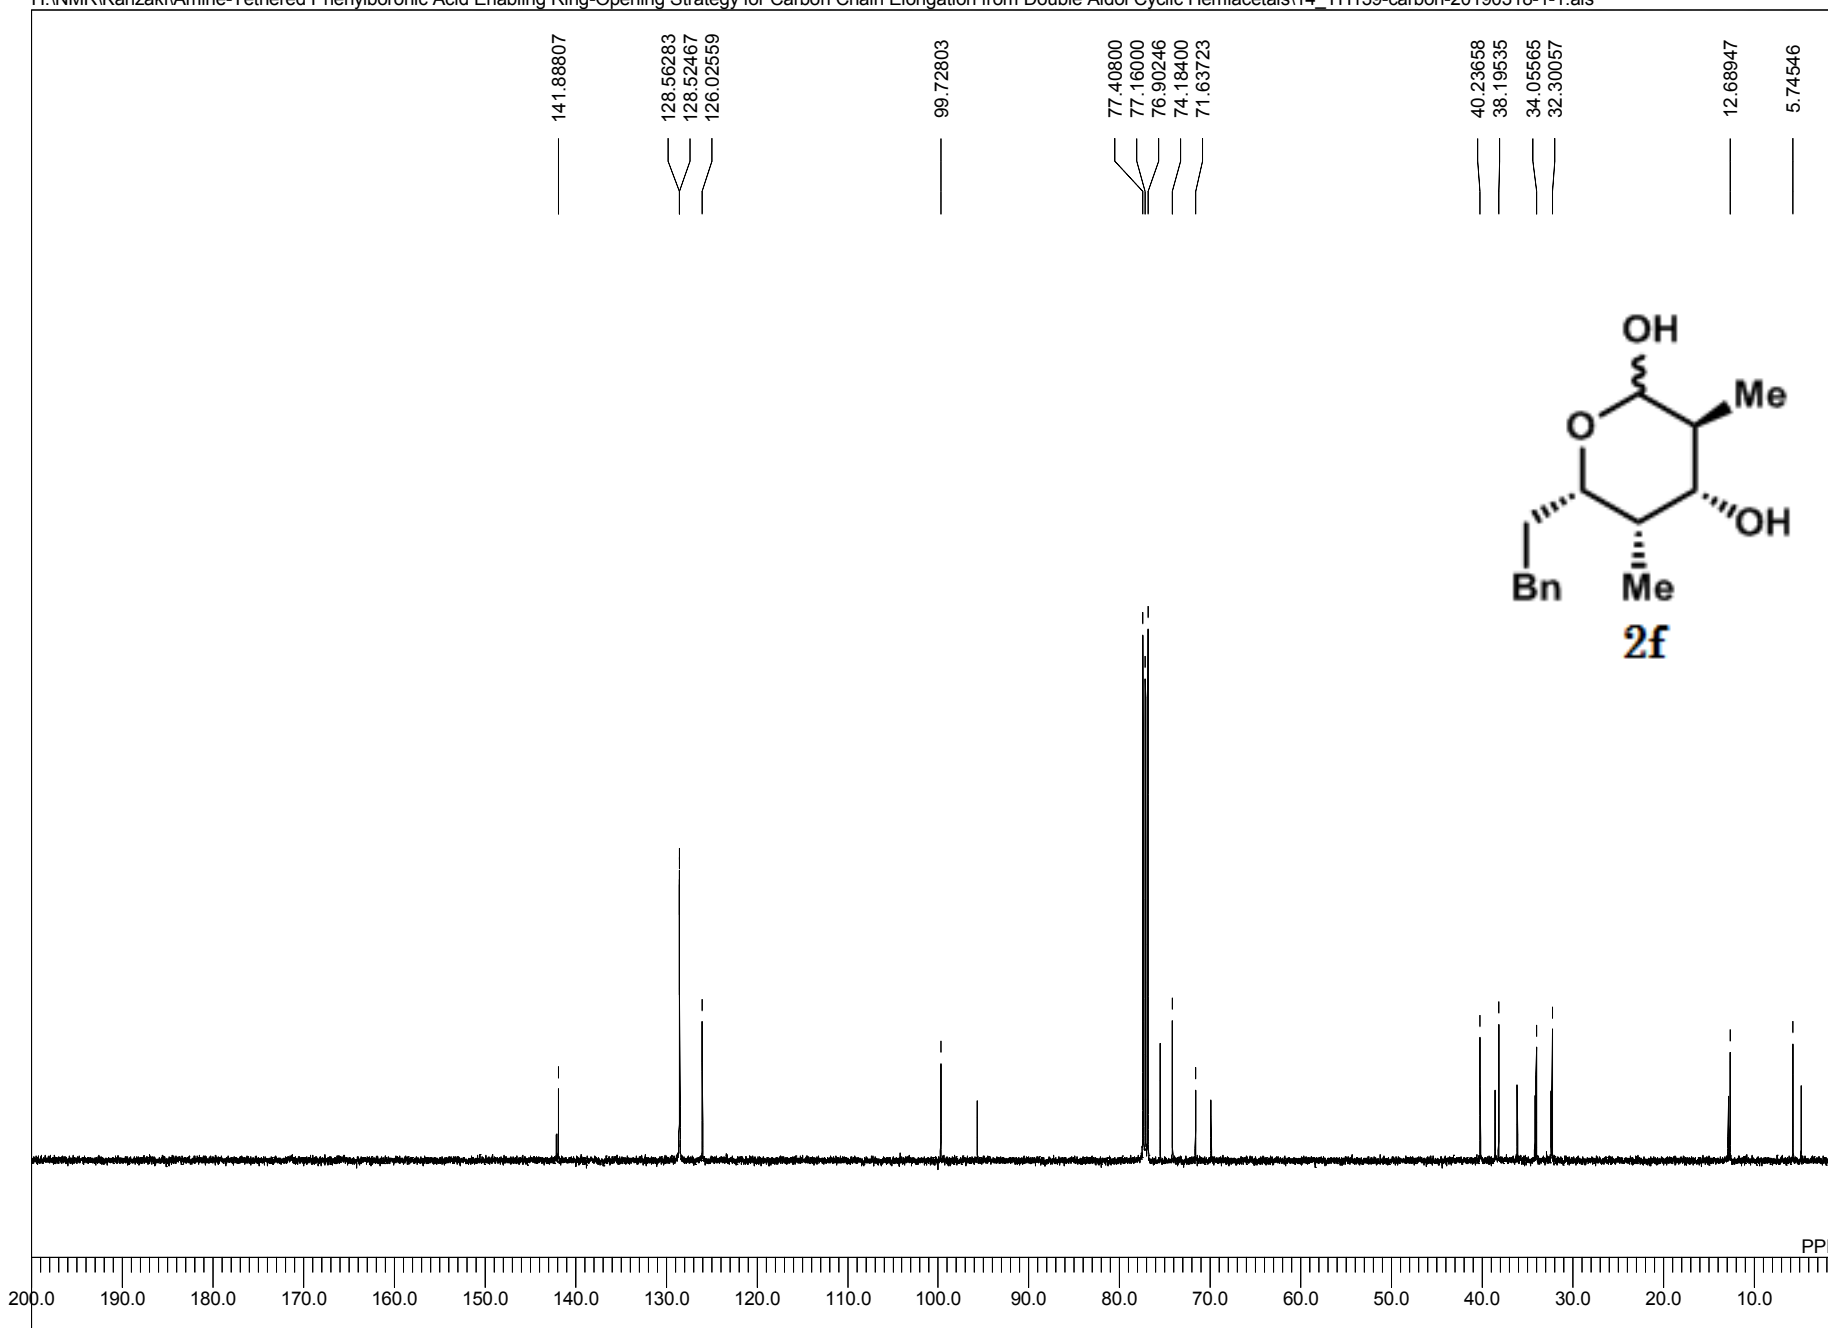



H:\NMR\Kanzaki\Amine-Tethered Phenylboronic Acid Enabling Ring-Opening Strategy for Carbon Chain Elongation from Double Aldol Cyclic Hemiacetals\15\_17YK462B-1-1.als

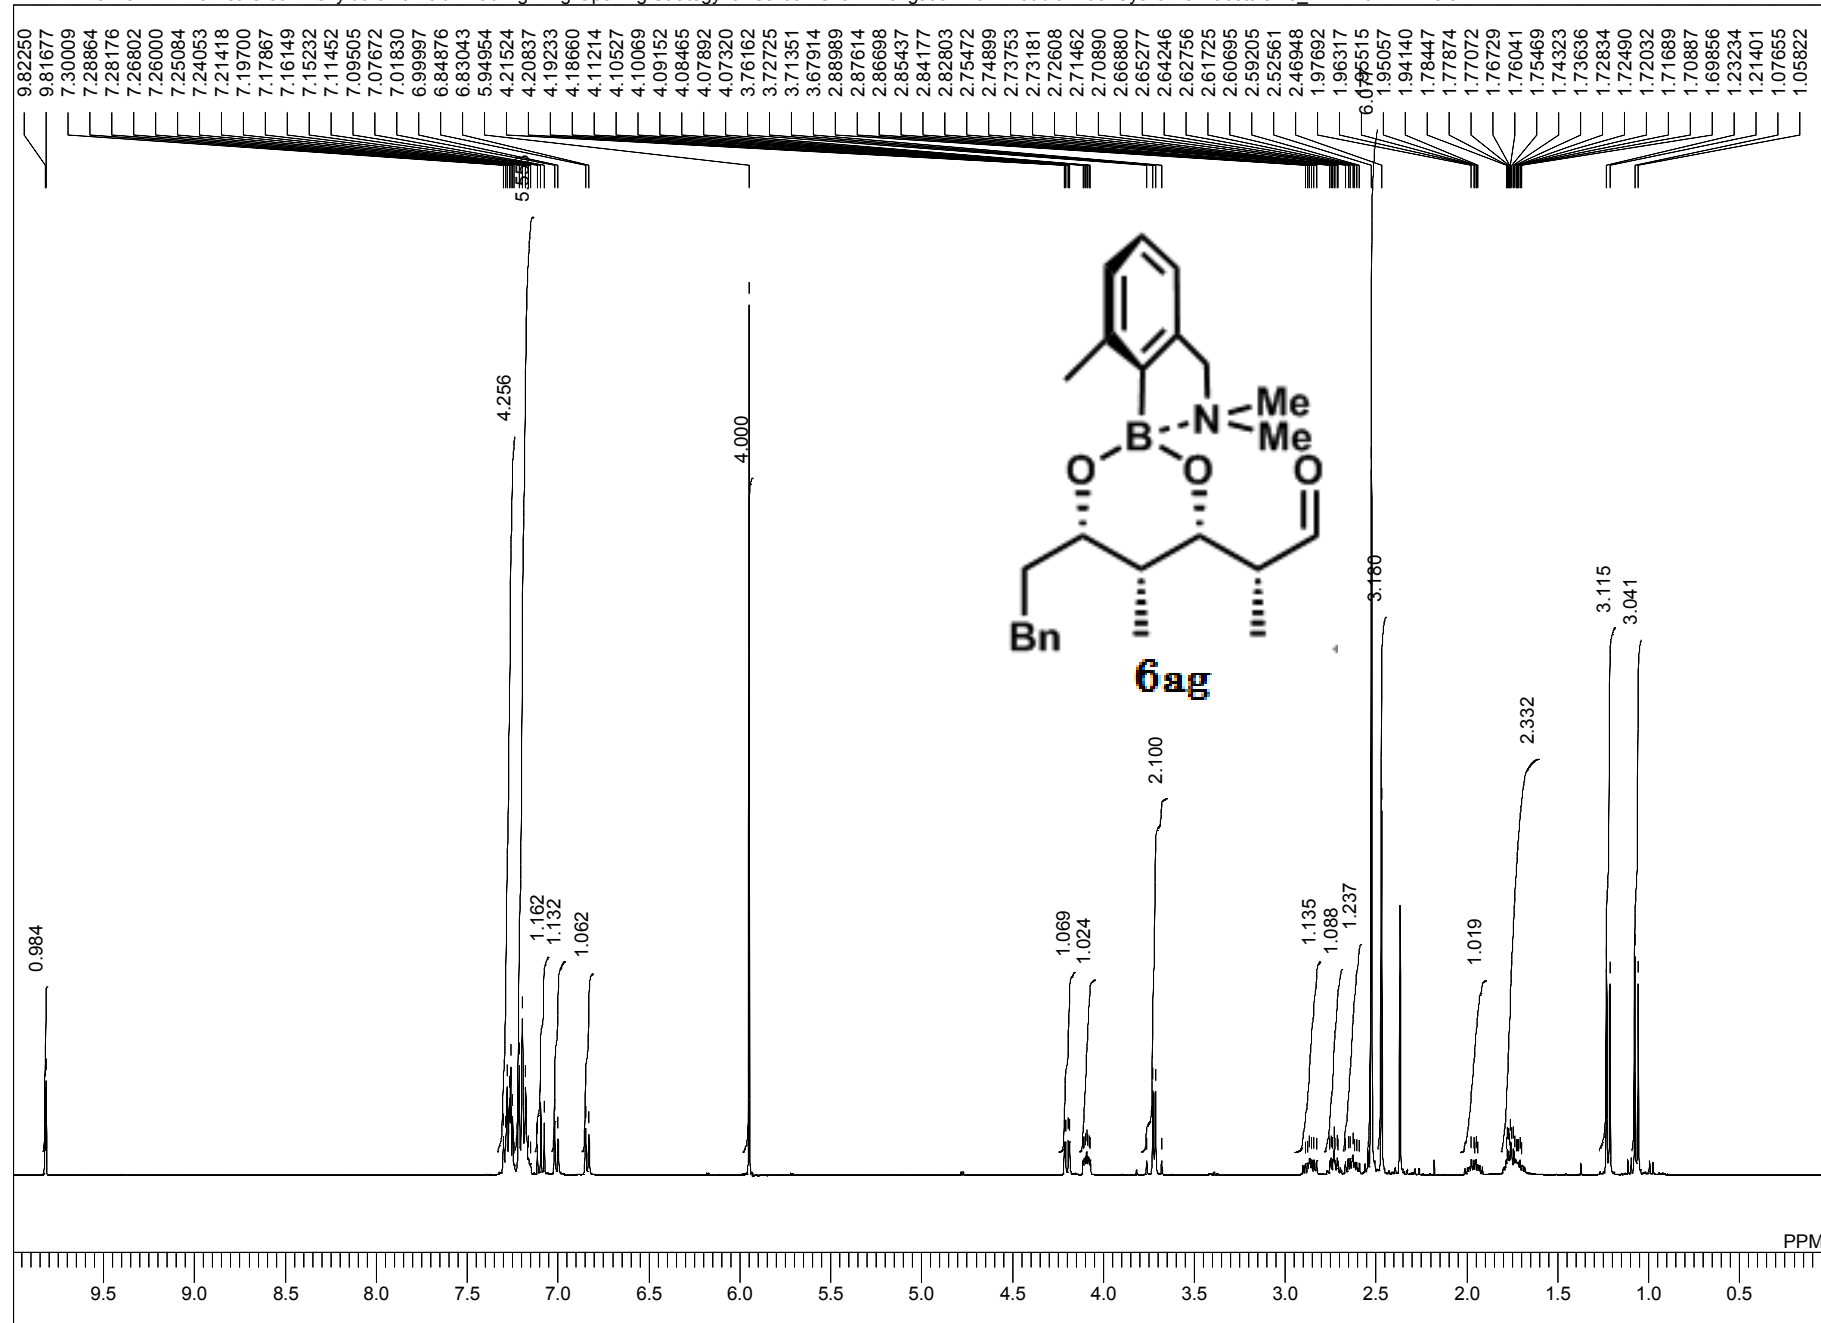

DFILE 15\_17YK462B-1-1.als  
 COMNT  
 DATIM 15-11-2017 20:32:33  
 OBNUC 1H  
 EXMOD proton.jxp  
 OBFRQ 391.78 MHz  
 OBSET 8.51 KHz  
 OBFIN 3.34 Hz  
 POINT 13107  
 FREQU 5882.35 Hz  
 SCANS 8  
 ACQTM 2.2282 sec  
 PD 5.0000 sec  
 PW1 5.22 usec  
 IRNUC 1H  
 CTEMP 20.3 c  
 SLVNT CDCL3  
 EXREF 7.26 ppm  
 BF 0.12 Hz  
 RGAIN 30

DFILE 16\_19YK689-B-2-1.als  
 COMNT  
 DATIM 25-04-2019 13:56:07  
 OBNUC 11B  
 EXMOD carbon.jxp  
 OBFRQ 125.70 MHz  
 OBSET 0.81 KHz  
 OBFIN 3.25 Hz  
 POINT 819  
 FREQU 31446.54 Hz  
 SCANS 8096  
 ACQTM 0.0261 sec  
 PD 80.0000 sec  
 PW1 3.98 usec  
 IRNUC 1H  
 CTEMP 20.5 c  
 SLVNT CDCL3  
 EXREF 0.00 ppm  
 BF 1.20 Hz  
 RGAIN 60

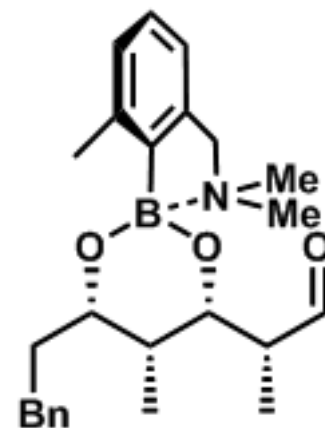

**6ag**

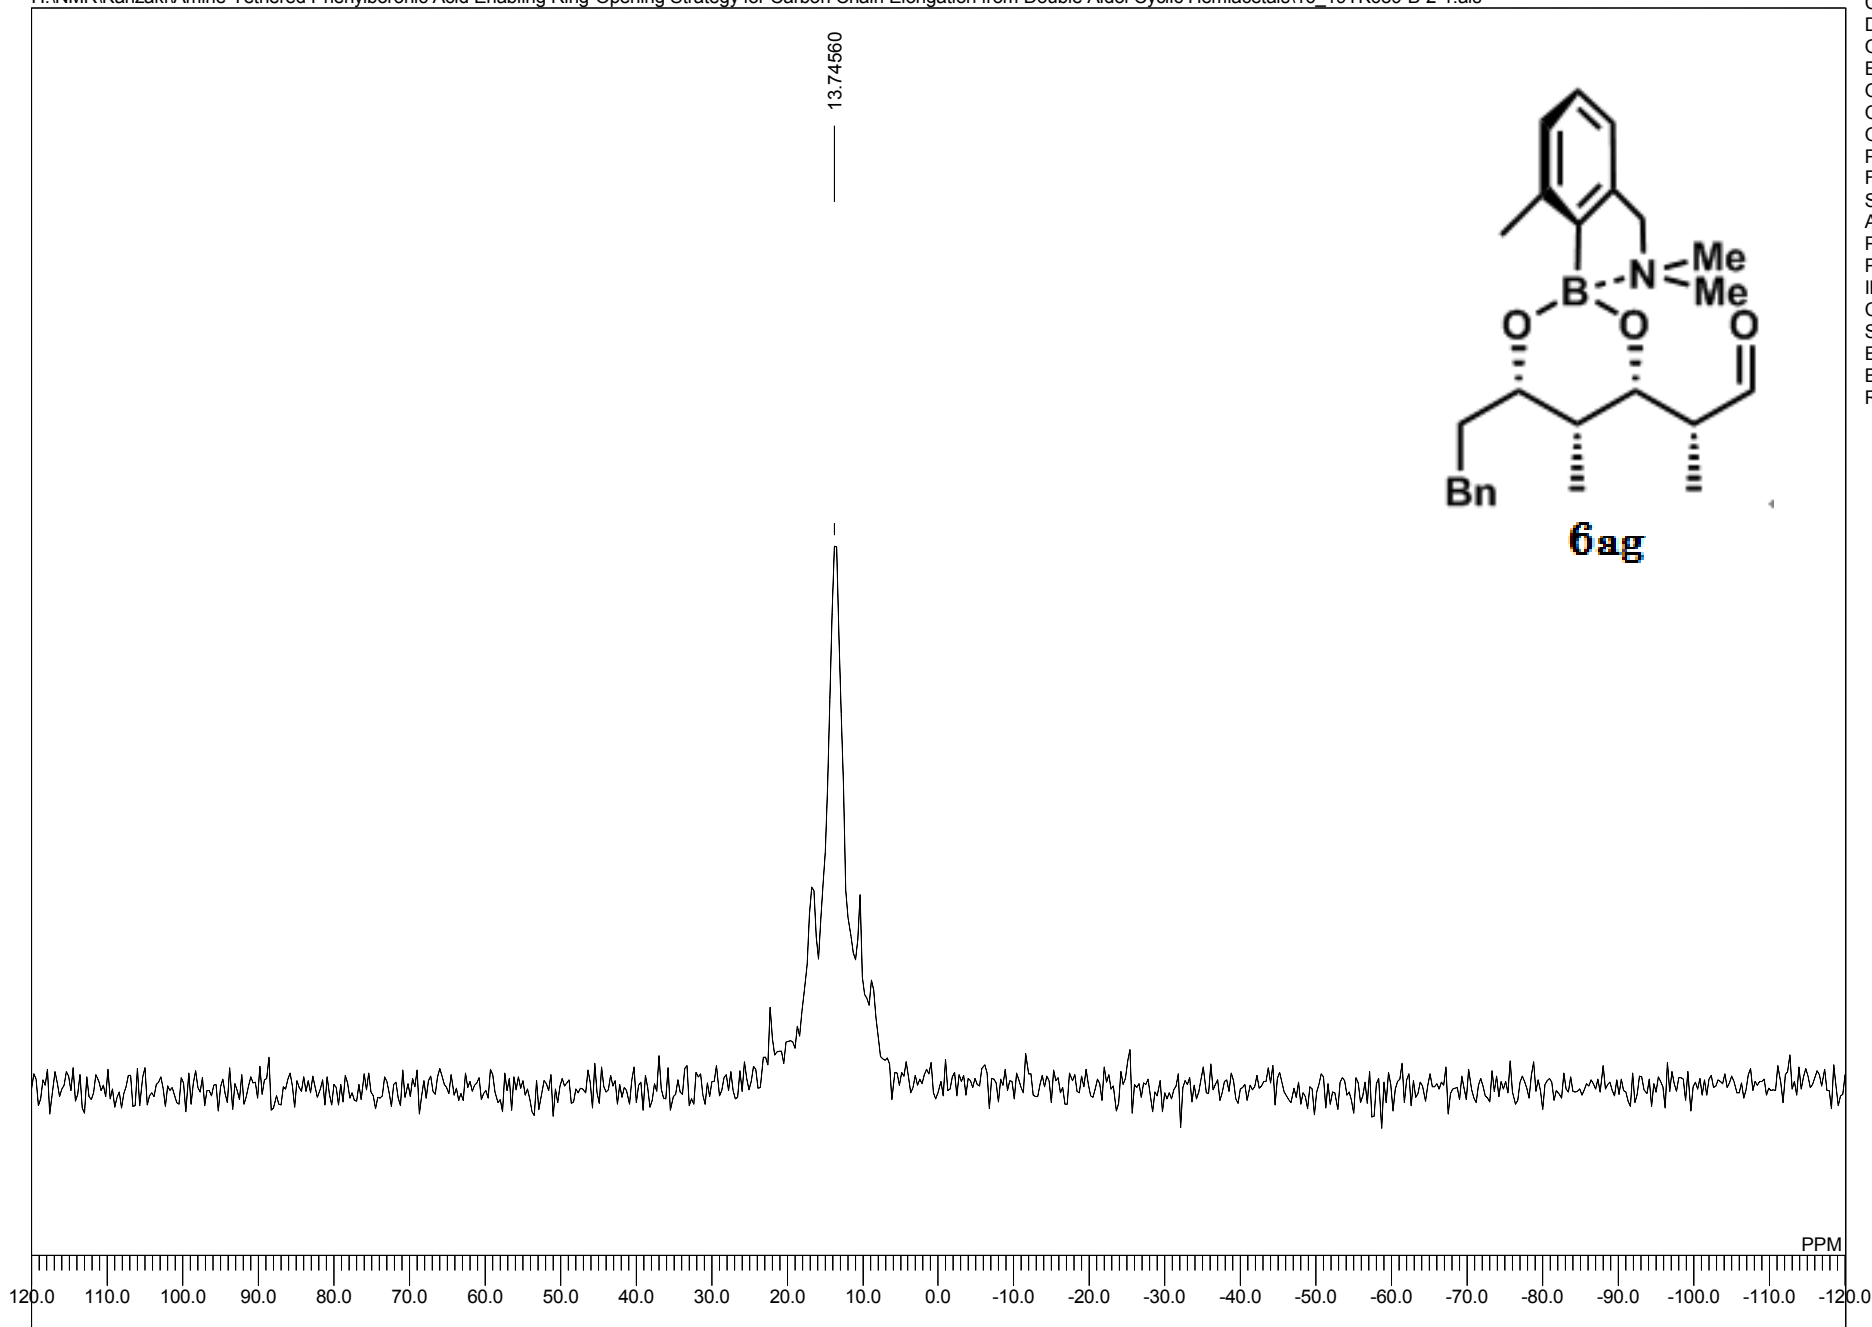

H:\NMR\Kanzaki\Amine-Tethered Phenylboronic Acid Enabling Ring-Opening Strategy for Carbon Chain Elongation from Double Aldol Cyclic Hemiacetals\17\_YH157-2-fra5-10-1-1.als

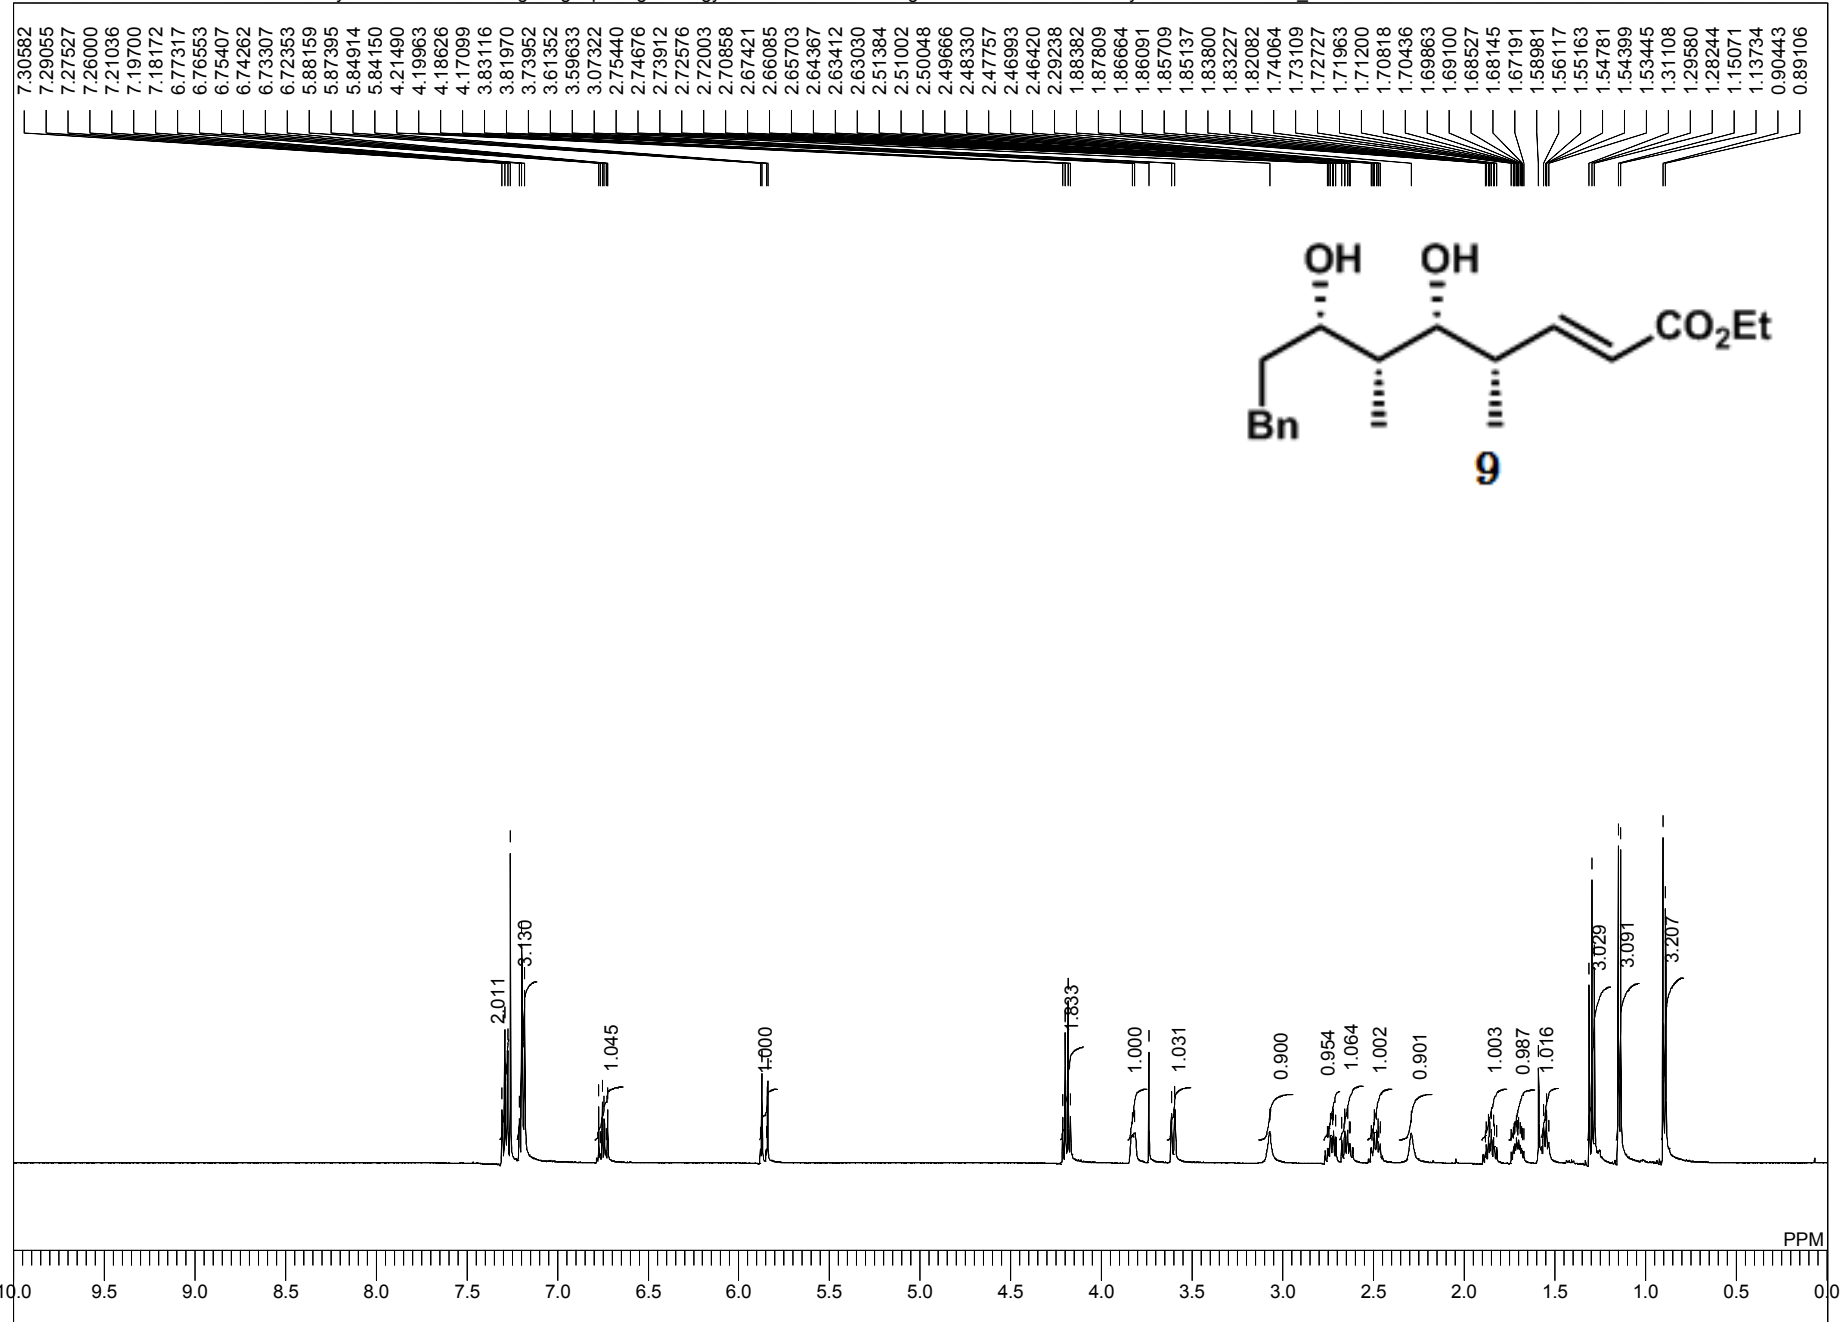

|       |                            |
|-------|----------------------------|
| DFILE | 17_YH157-2-fra5-10-1-1.als |
| COMNT |                            |
| DATIM | 2019-04-09 09:12:56        |
| OBNUC | <sup>1</sup> H             |
| EXMOD | proton.jxp                 |
| OBFRQ | 500.16 MHz                 |
| OBSET | 2.41 KHz                   |
| OBFIN | 6.01 Hz                    |
| POINT | 13107                      |
| FREQU | 12515.64 Hz                |
| SCANS | 8                          |
| ACQTM | 1.0473 sec                 |
| PD    | 6.0000 sec                 |
| PW1   | 5.55 usec                  |
| IRNUC | <sup>1</sup> H             |
| CTEMP | 21.4 c                     |
| SLVNT | CDCL <sub>3</sub>          |
| EXREF | 7.26 ppm                   |
| BF    | 0.12 Hz                    |
| RGAIN | 34                         |

H:\NMR\Kanzaki\Amine-Tethered Phenylboronic Acid Enabling Ring-Opening Strategy for Carbon Chain Elongation from Double Aldol Cyclic Hemiacetals\18\_YH157-carbon-1-1.als

DFILE 18\_YH157-carbon-1-1.als  
 COMNT  
 DATIM 2019-04-15 11:02:09  
 OBNUC 13C  
 EXMOD carbon.jxp  
 OBFRQ 125.77 MHz  
 OBSET 7.87 KHz  
 OBFIN 4.21 Hz  
 POINT 26214  
 FREQU 31446.54 Hz  
 SCANS 1200  
 ACQTM 0.8336 sec  
 PD 2.0000 sec  
 PW1 3.40 usec  
 IRNUC 1H  
 CTEMP 22.1 c  
 SLVNT CDCL3  
 EXREF 77.16 ppm  
 BF 1.20 Hz  
 RGAIN 60

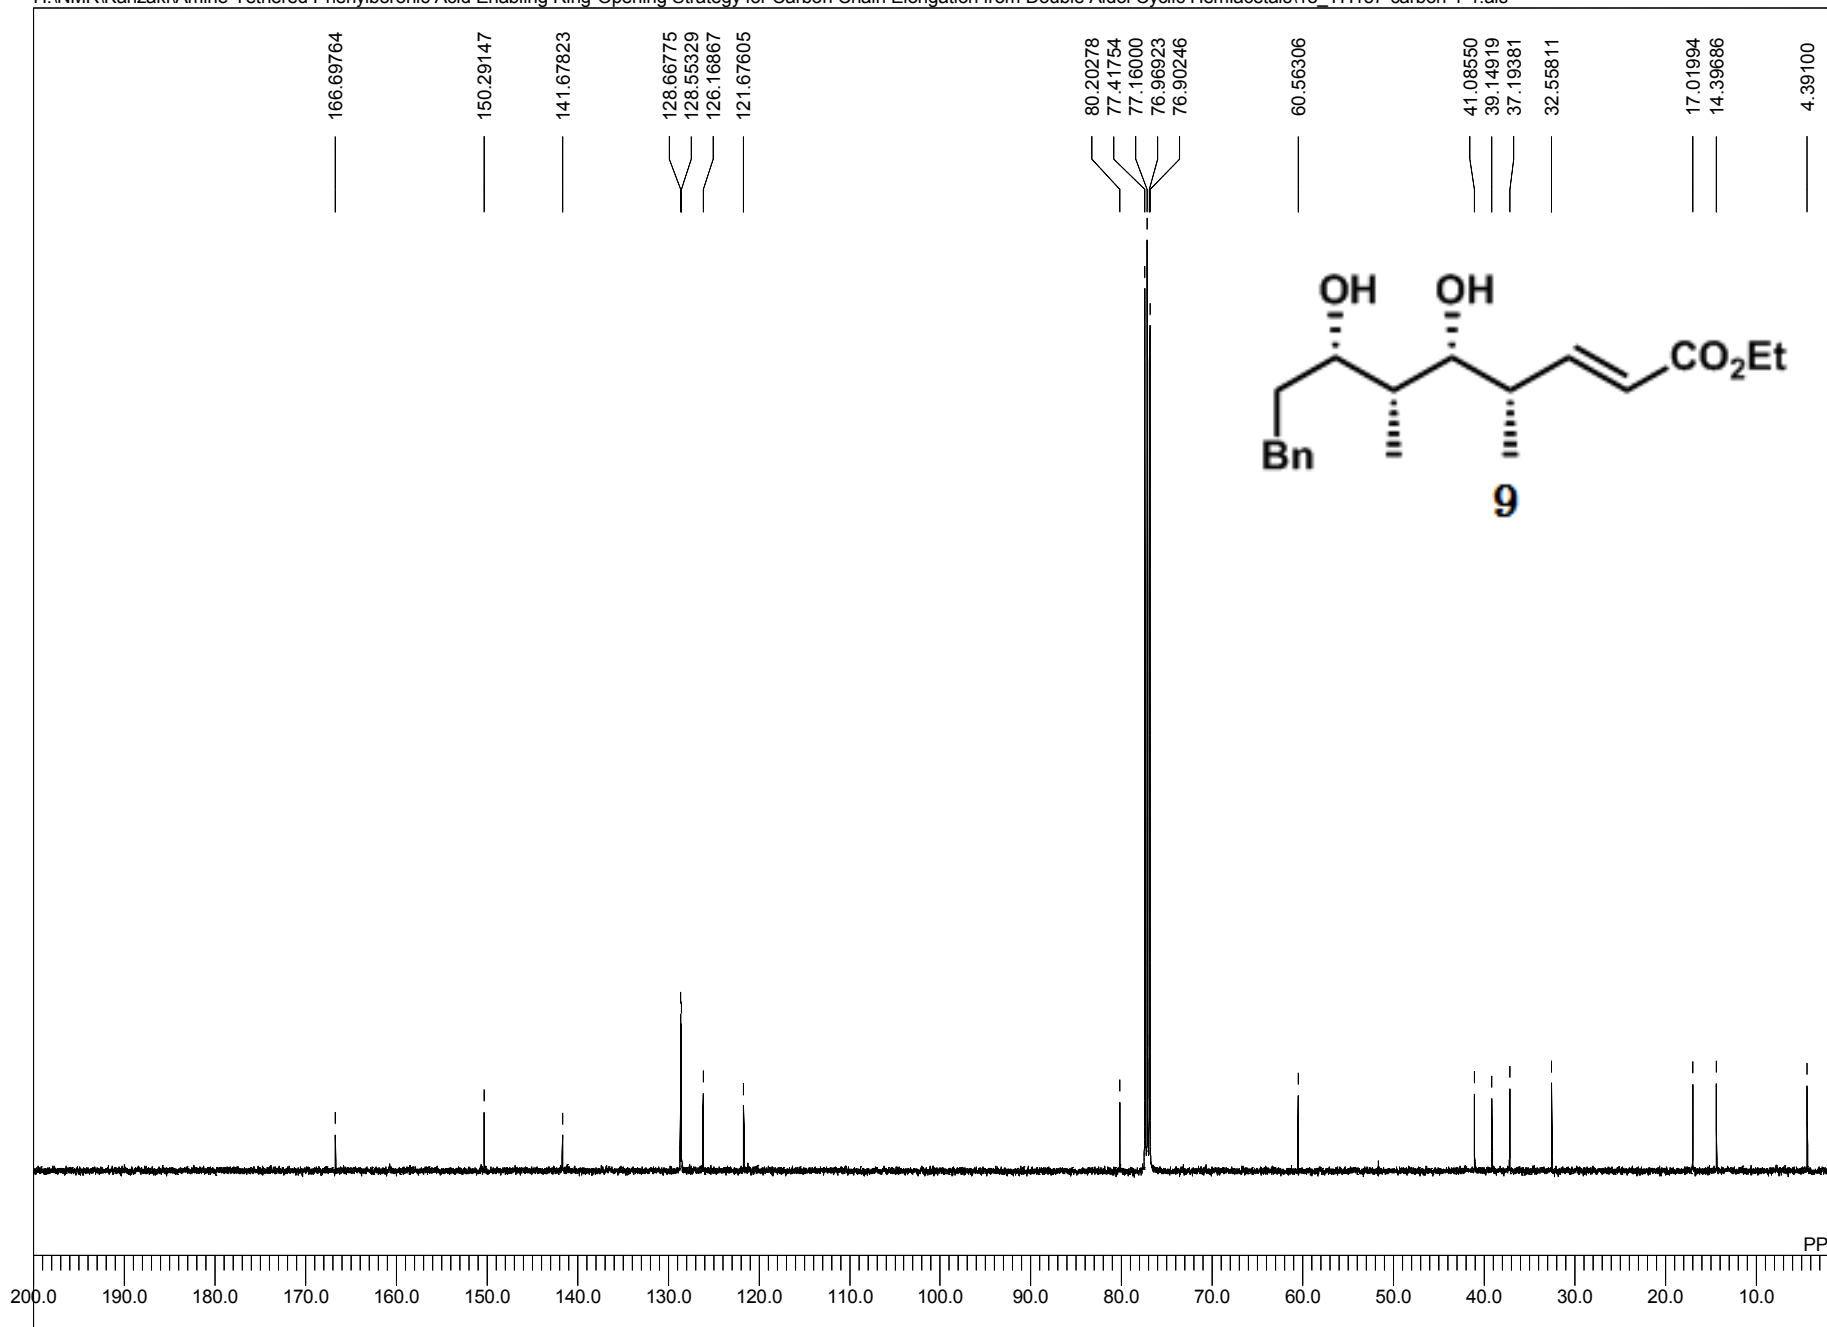

H:\NMR\Kanzaki\Amine-Tethered Phenylboronic Acid Enabling Ring-Opening Strategy for Carbon Chain Elongation from Double Aldol Cyclic Hemiacetals\19\_YH160-purified-1-1.als

DFILE 19\_YH160-purified-1-1.als  
 COMNT  
 DATIM 2019-04-12 20:44:20  
 OBNUC 1H  
 EXMOD proton.jxp  
 OBFRQ 500.16 MHz  
 OBSET 2.41 KHz  
 OBFIN 6.01 Hz  
 POINT 13107  
 FREQU 7507.51 Hz  
 SCANS 32  
 ACQTM 1.7459 sec  
 PD 6.0000 sec  
 PW1 5.55 usec  
 IRNUC 1H  
 CTEMP 21.5 c  
 SLVNT CDCL3  
 EXREF 7.26 ppm  
 BF 1.20 Hz  
 RGAIN 40

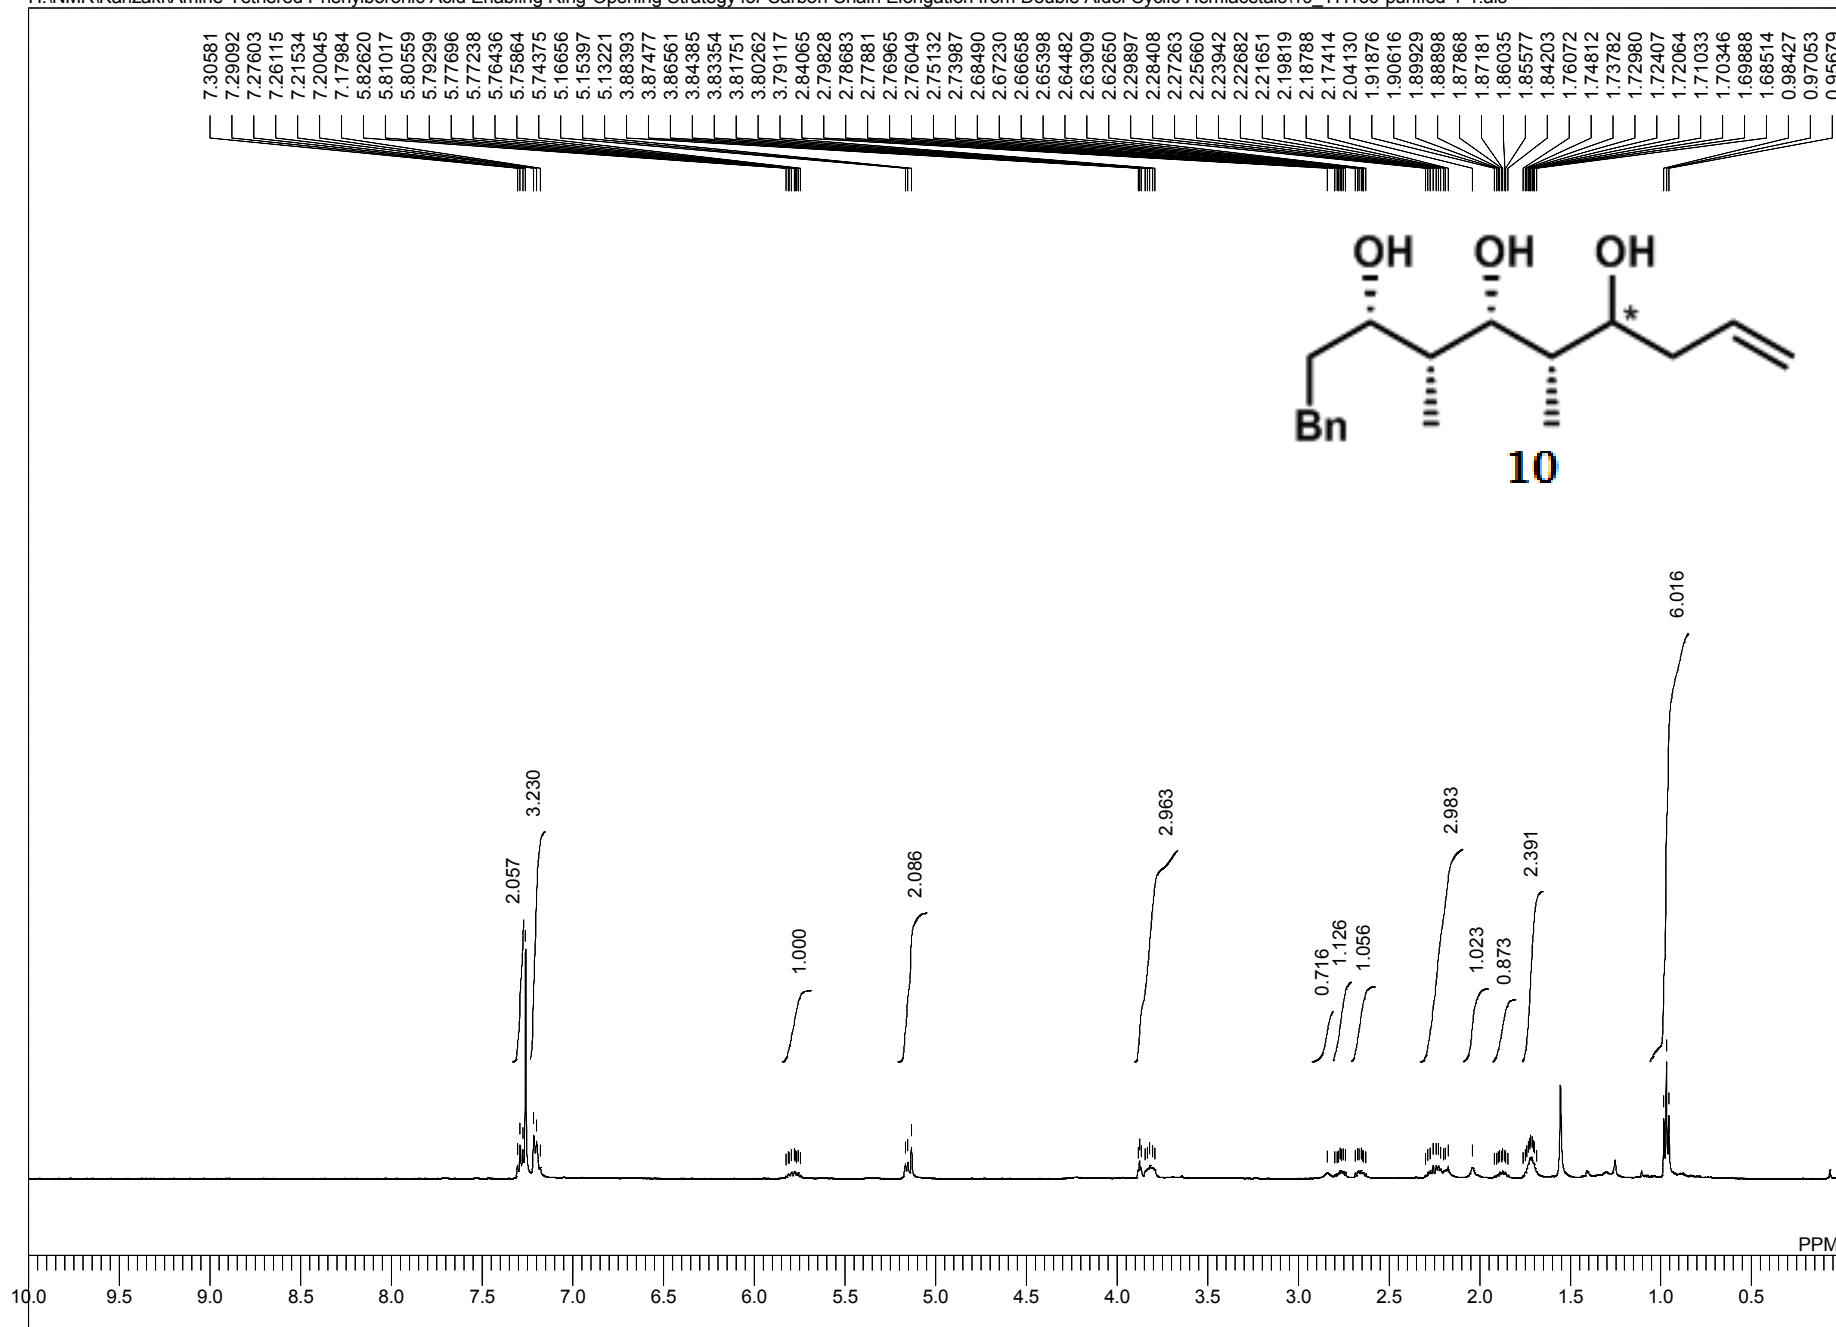

H:\NMR\Kanzaki\Amine-Tethered Phenylboronic Acid Enabling Ring-Opening Strategy for Carbon Chain Elongation from Double Aldol Cyclic Hemiacetals\20\_YH160-purified-carbon-1-1.als

DFILE 20\_YH160-purified-carbon-1-  
 COMNT  
 DATIM 2019-04-12 23:40:42  
 OBNUC 13C  
 EXMOD carbon.jxp  
 OBFRQ 125.77 MHz  
 OBSET 7.87 KHz  
 OBFIN 4.21 Hz  
 POINT 26214  
 FREQU 31446.54 Hz  
 SCANS 12000  
 ACQTM 0.8336 sec  
 PD 2.0000 sec  
 PW1 3.40 usec  
 IRNUC 1H  
 CTEMP 22.0 c  
 SLVNT CDCL3  
 EXREF 77.16 ppm  
 BF 1.20 Hz  
 RGAIN 60

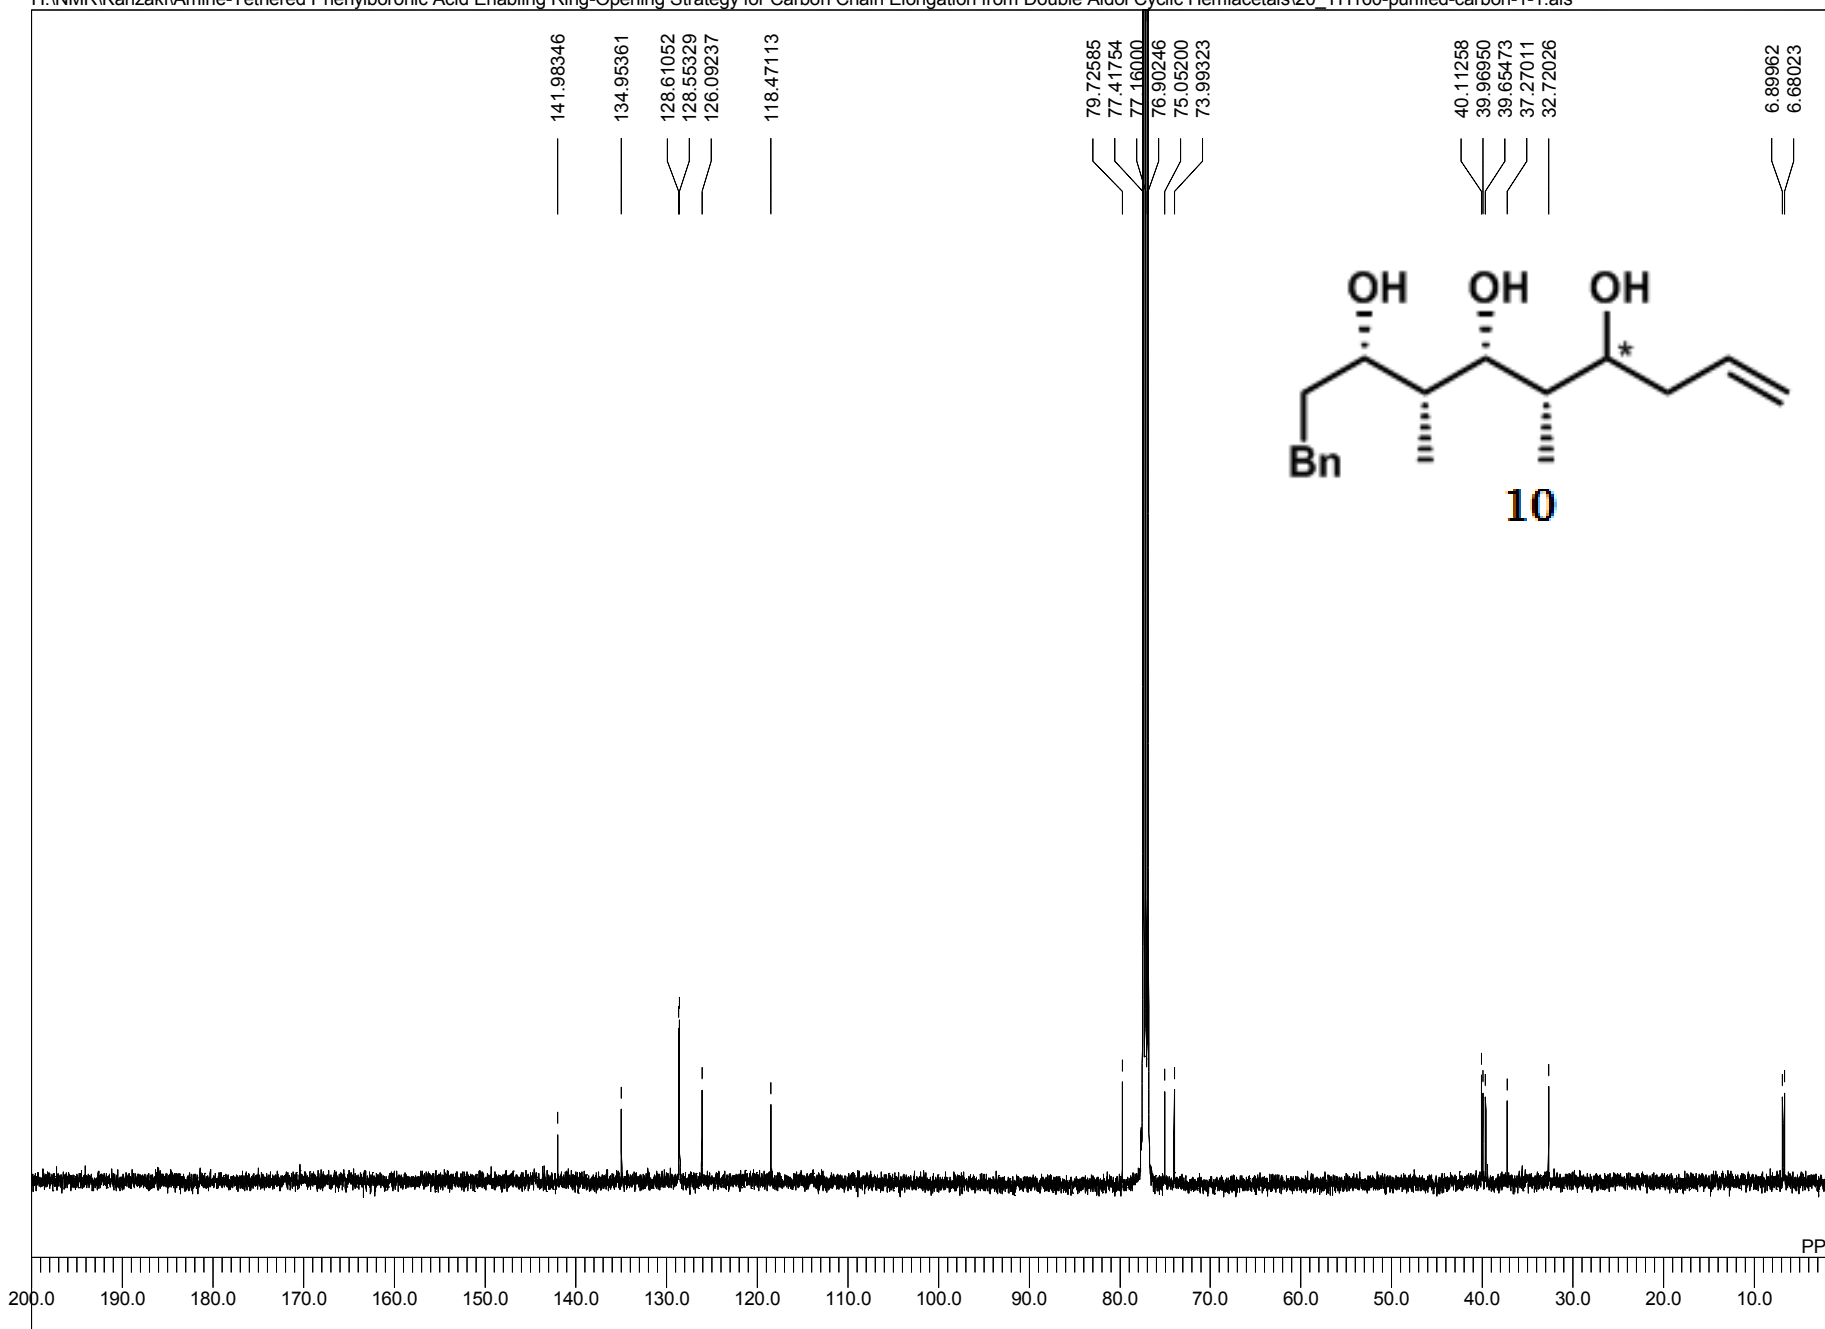

H:\NMR\Kanzaki\Amine-Tethered Phenylboronic Acid Enabling Ring-Opening Strategy for Carbon Chain Elongation from Double Aldol Cyclic Hemiacetals\21\_19YK689chiral-fr3-MeOD-sec-1-1.als

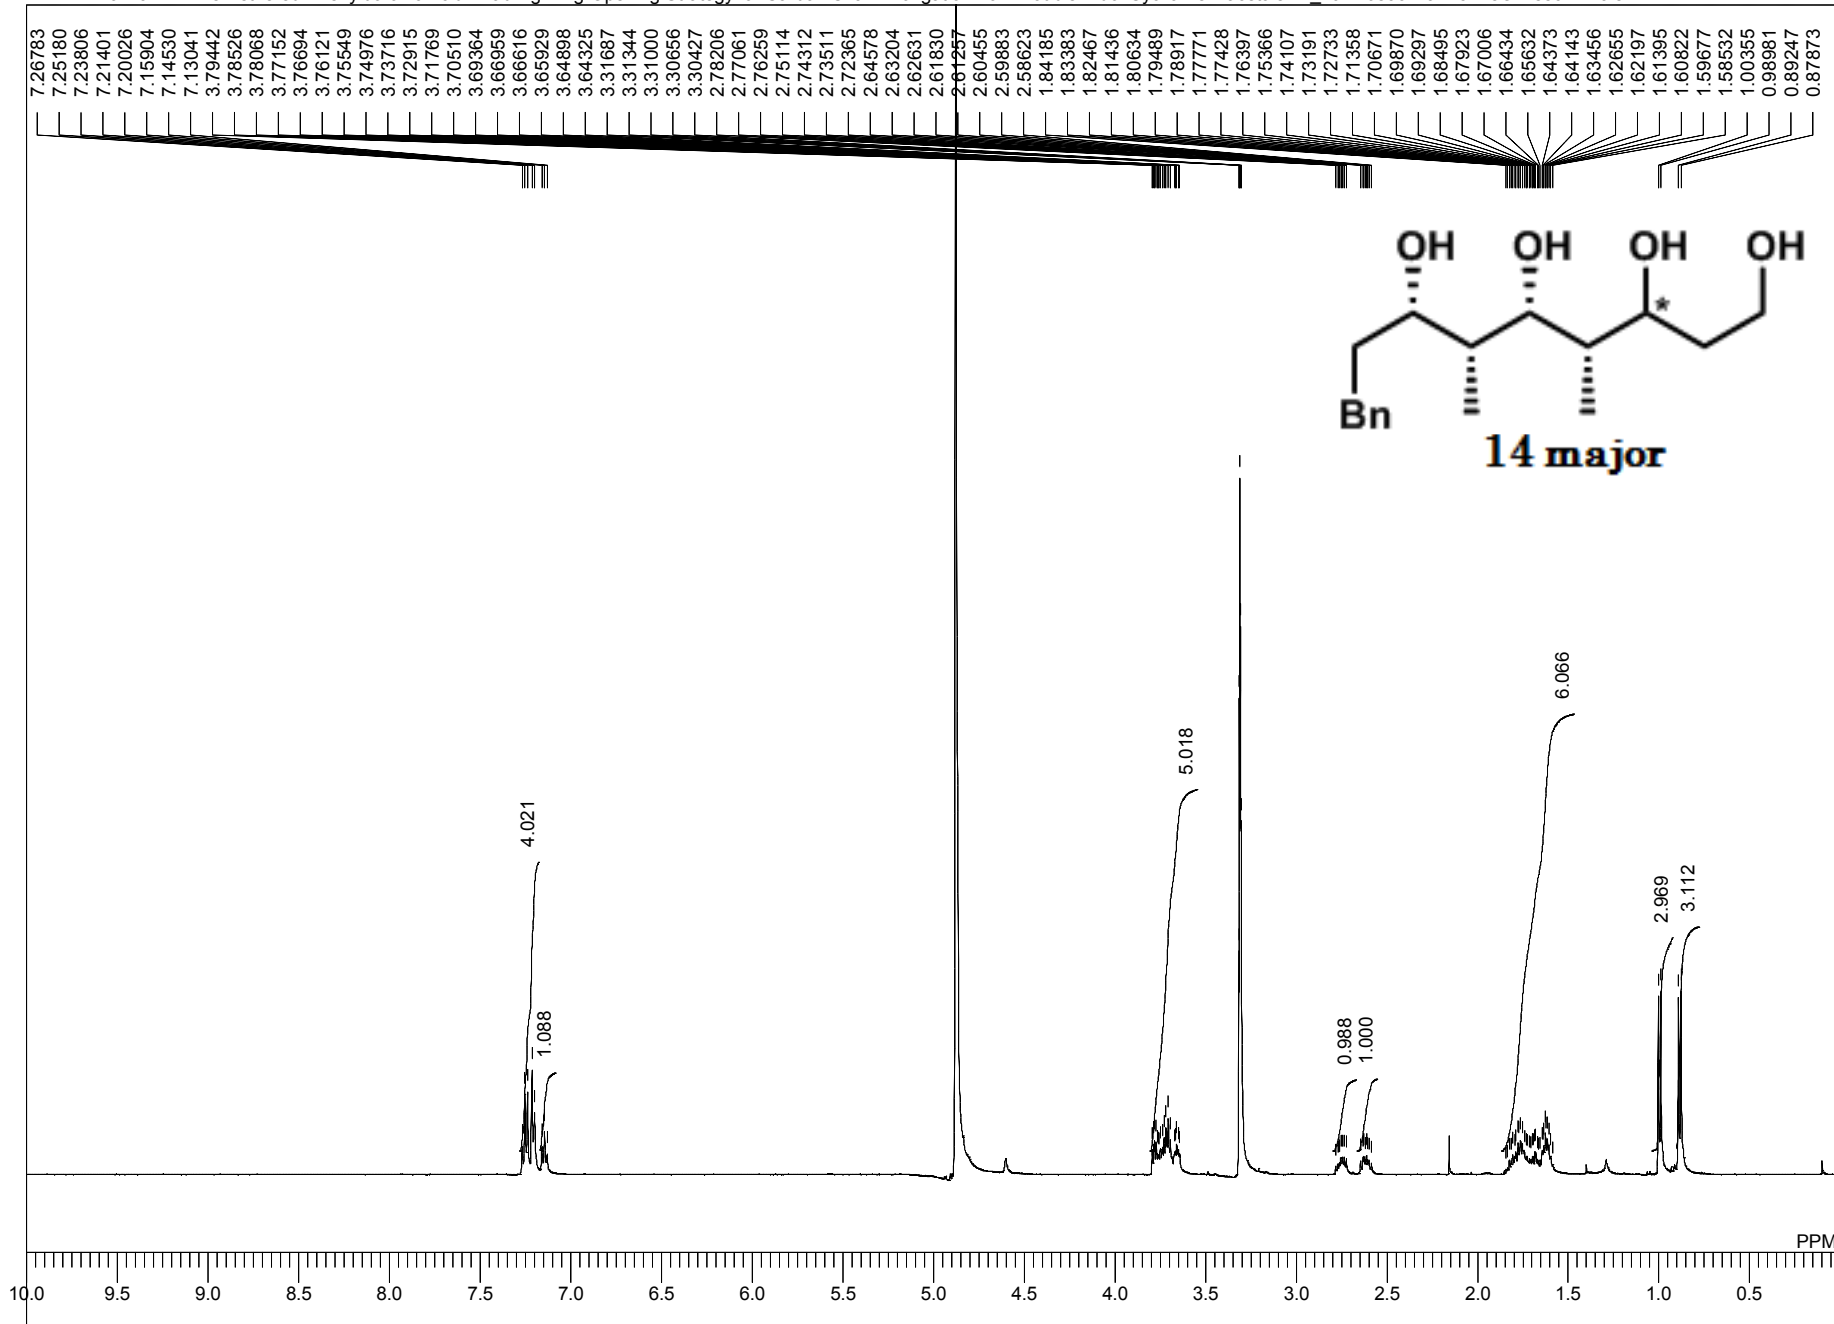

DFILE 21\_19YK689chiral-fr3-MeOD  
 COMNT  
 DATIM 2019-05-09 19:22:59  
 OBNUC 1H  
 EXMOD proton.jpg  
 OBFRQ 500.16 MHz  
 OBSET 2.41 KHz  
 OBFIN 6.01 Hz  
 POINT 13107  
 FREQU 7507.51 Hz  
 SCANS 16  
 ACQTM 1.7459 sec  
 PD 6.0000 sec  
 PW1 5.55 usec  
 IRNUC 1H  
 CTEMP 21.8 c  
 SLVNT CD3OD  
 EXREF 3.31 ppm  
 BF 0.12 Hz  
 RGAIN 32

H:\NMR\Kanzaki\Amine-Tethered Phenylboronic Acid Enabling Ring-Opening Strategy for Carbon Chain Elongation from Double Aldol Cyclic Hemiacetals\22\_19yk689chiral-fr3carbon-MeOD-1-1.als

DFILE 22\_19yk689chiral-fr3carbon-  
 COMNT  
 DATIM 10-05-2019 22:34:59  
 OBNUC 13C  
 EXMOD carbon.jxp  
 OBFRQ 98.52 MHz  
 OBSET 4.64 KHz  
 OBFIN 8.74 Hz  
 POINT 26214  
 FREQU 24630.54 Hz  
 SCANS 13000  
 ACQTM 1.0643 sec  
 PD 2.0000 sec  
 PW1 3.12 usec  
 IRNUC 1H  
 CTEMP 20.4 c  
 SLVNT CD3OD  
 EXREF 49.00 ppm  
 BF 1.20 Hz  
 RGAIN 60

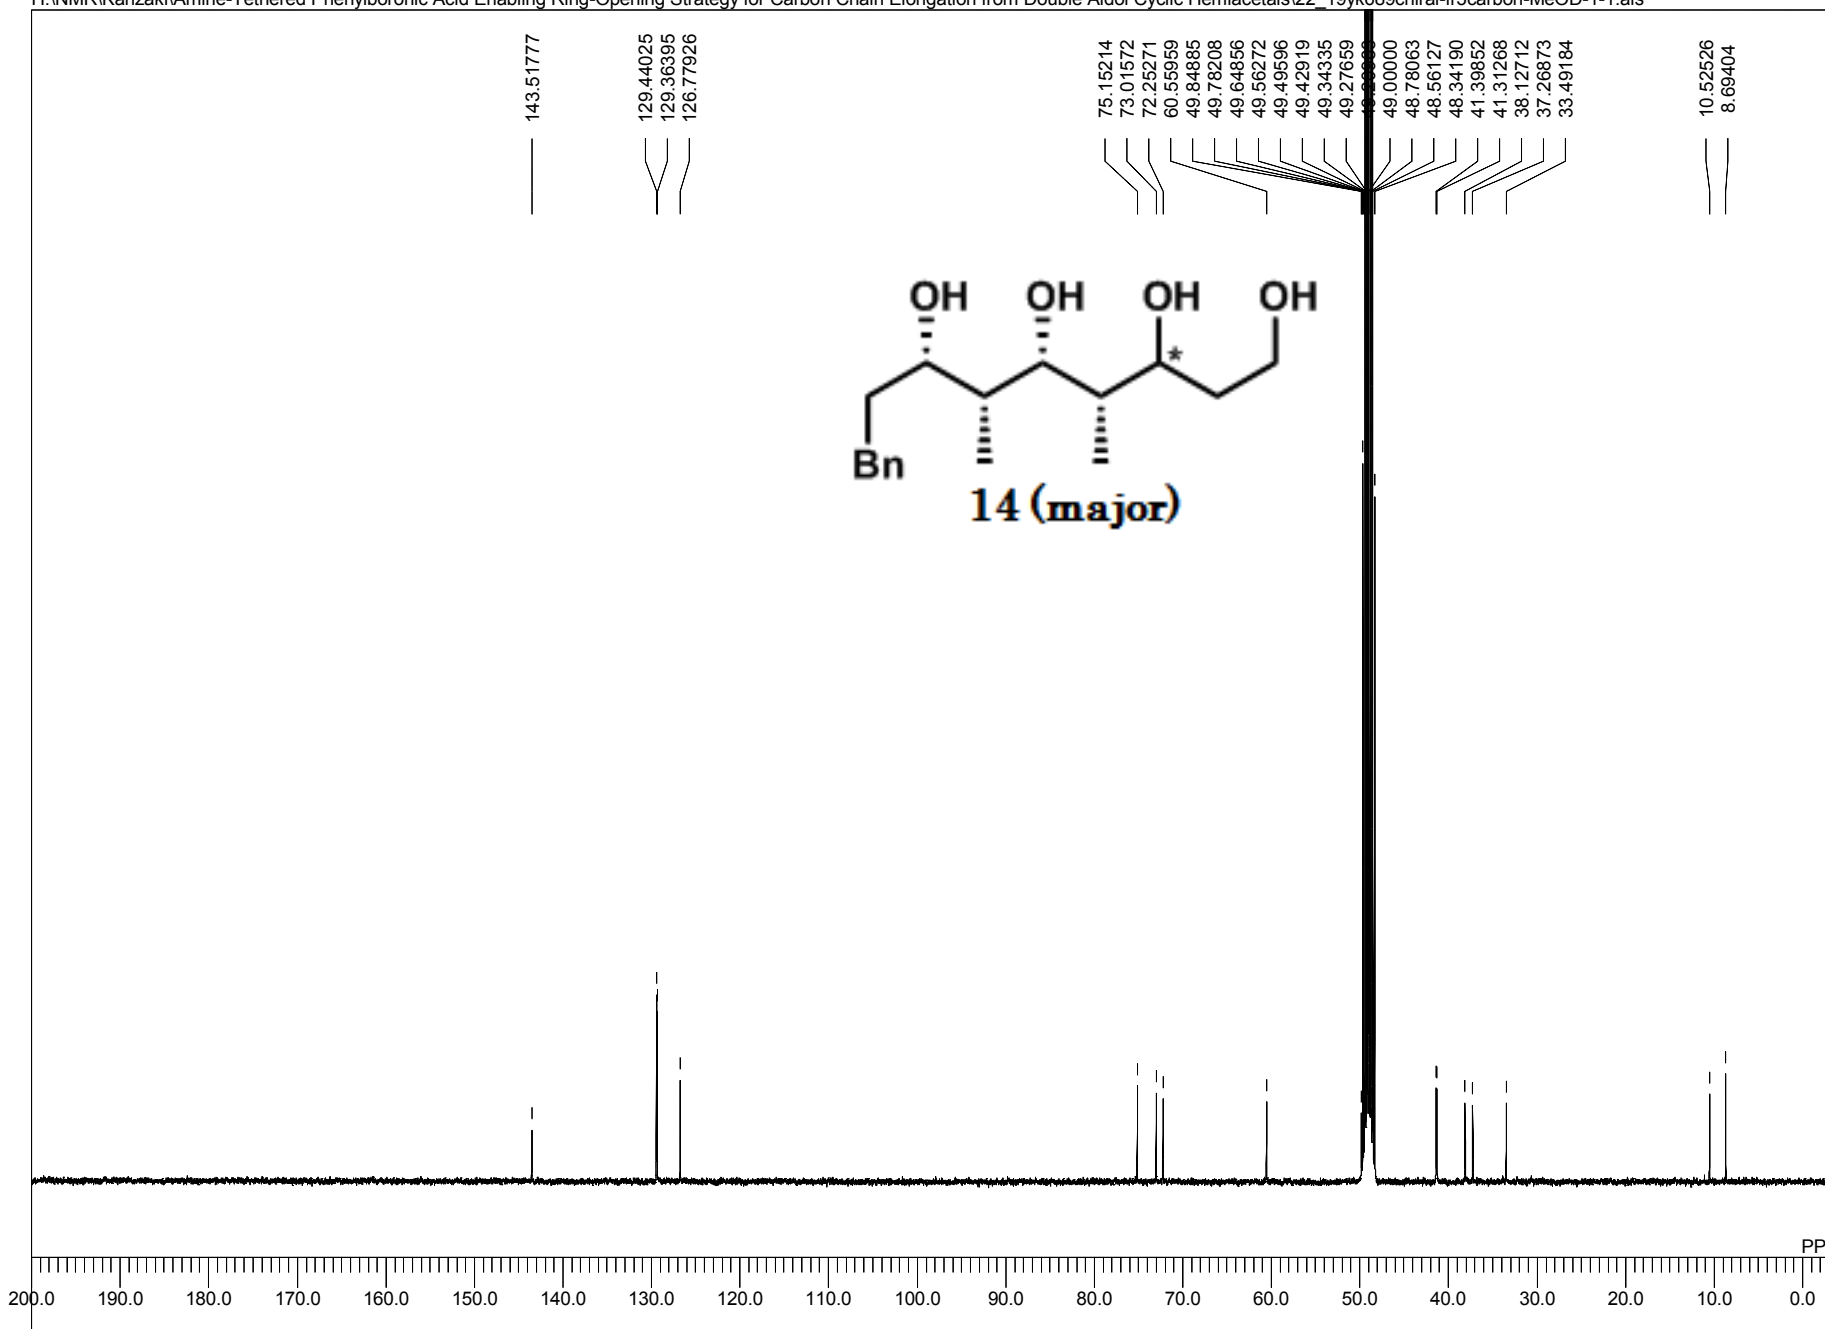



H:\NMR\Kanzaki\Amine-Tethered Phenylboronic Acid Enabling Ring-Opening Strategy for Carbon Chain Elongation from Double Aldol Cyclic Hemiacetals\23\_19YK689chiral-fr2-MeOD-sec-1-1.als

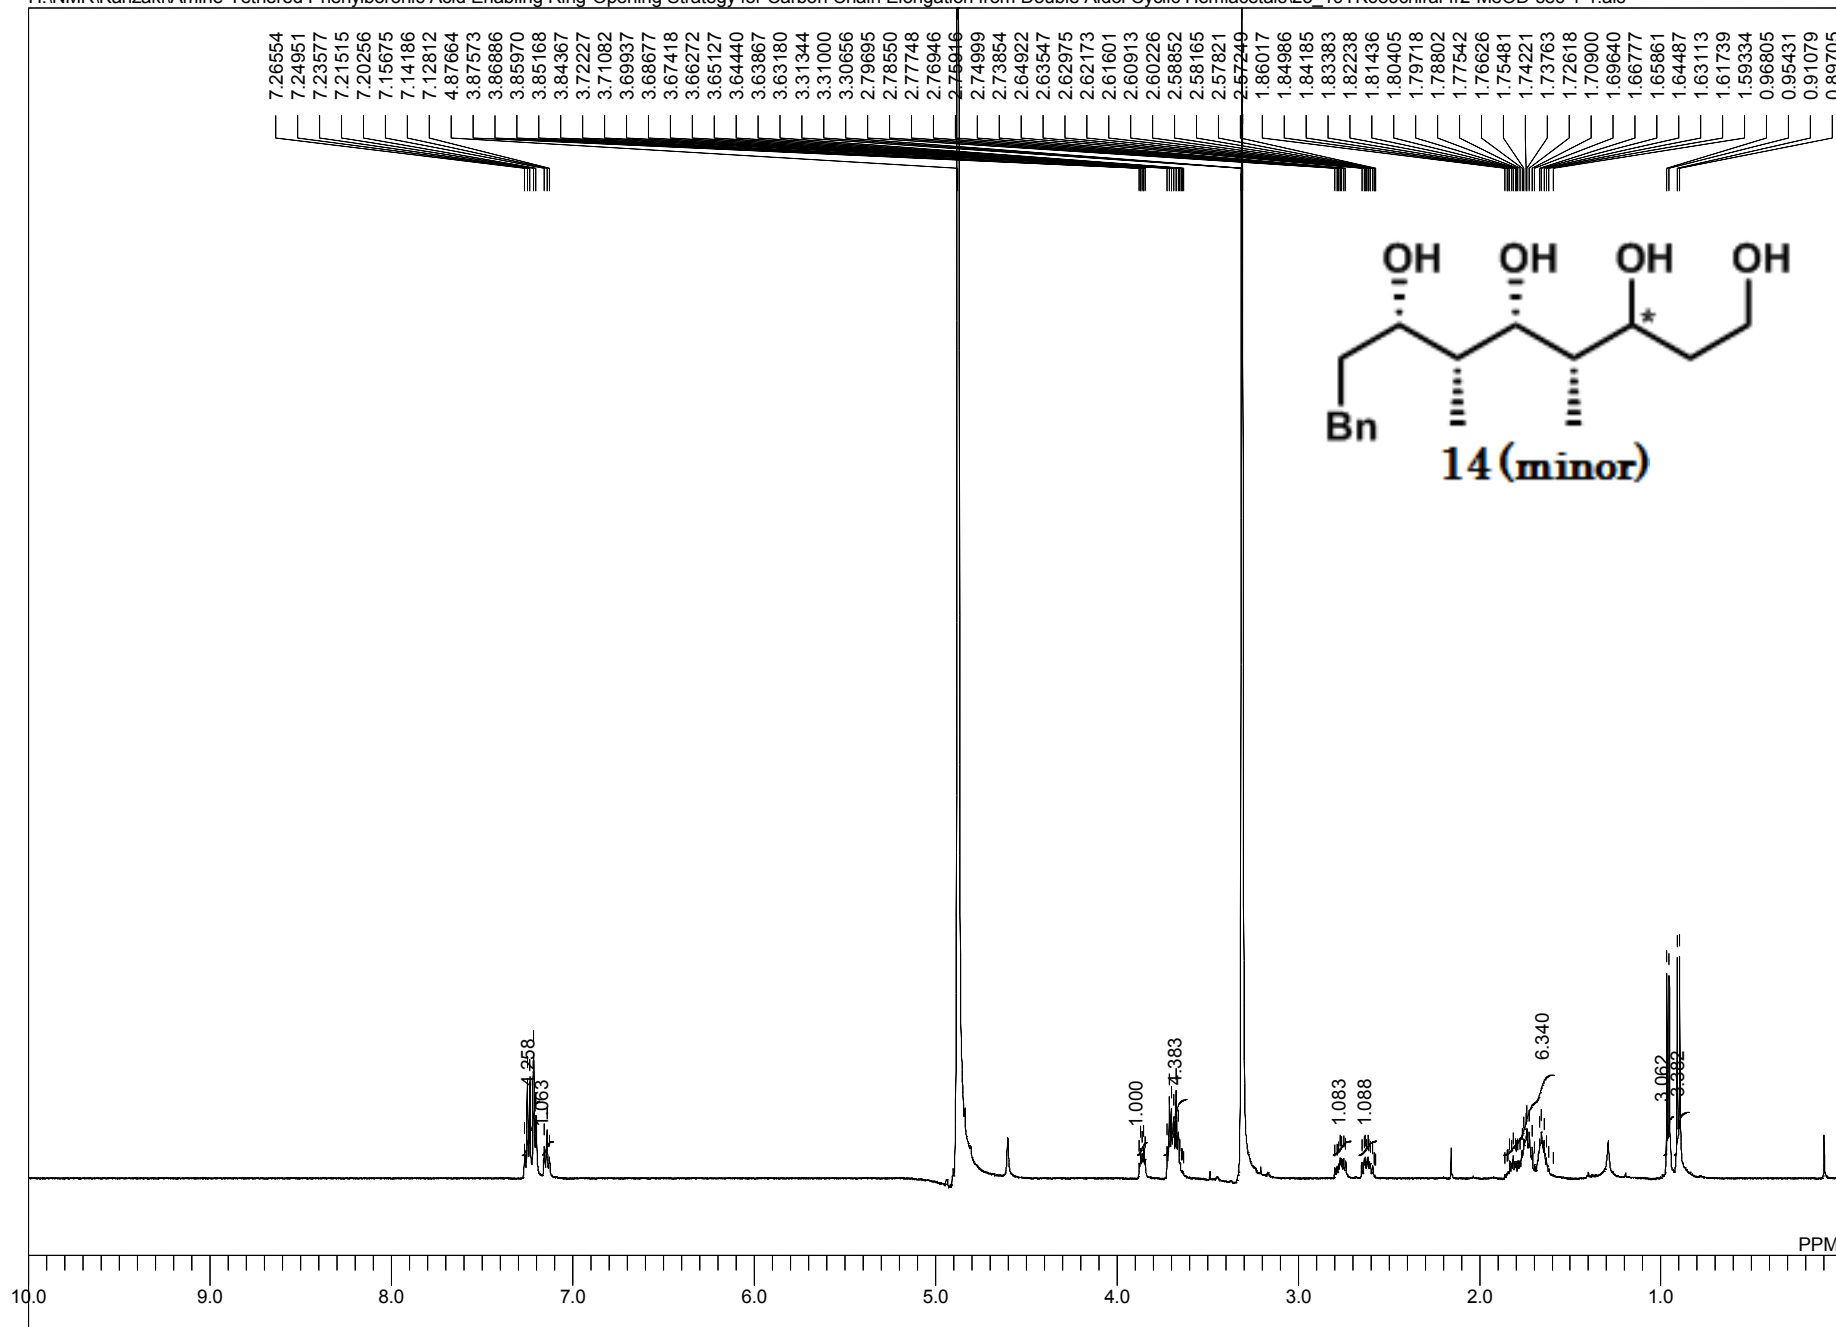

DFILE 23\_19YK689chiral-fr2-MeOD  
 COMNT  
 DATIM 2019-05-09 19:17:43  
 OBNUC 1H  
 EXMOD proton.jpg  
 OBFRQ 500.16 MHz  
 OBSET 2.41 KHz  
 OBFIN 6.01 Hz  
 POINT 13107  
 FREQU 7507.51 Hz  
 SCANS 16  
 ACQTM 1.7459 sec  
 PD 6.0000 sec  
 PW1 5.55 usec  
 IRNUC 1H  
 CTEMP 21.7 c  
 SLVNT CD3OD  
 EXREF 3.31 ppm  
 BF 0.12 Hz  
 RGAIN 32

DFILE 24\_19YK689chiral-fr2-carbon  
 COMNT  
 DATIM 09-05-2019 20:16:57  
 OBNUC 13C  
 EXMOD carbon.jxp  
 OBFRQ 98.52 MHz  
 OBSET 4.64 KHz  
 OBFIN 8.74 Hz  
 POINT 26214  
 FREQU 24630.54 Hz  
 SCANS 16384  
 ACQTM 1.0643 sec  
 PD 2.0000 sec  
 PW1 3.12 usec  
 IRNUC 1H  
 CTEMP 20.5 c  
 SLVNT CD3OD  
 EXREF 49.00 ppm  
 BF 1.20 Hz  
 RGAIN 60

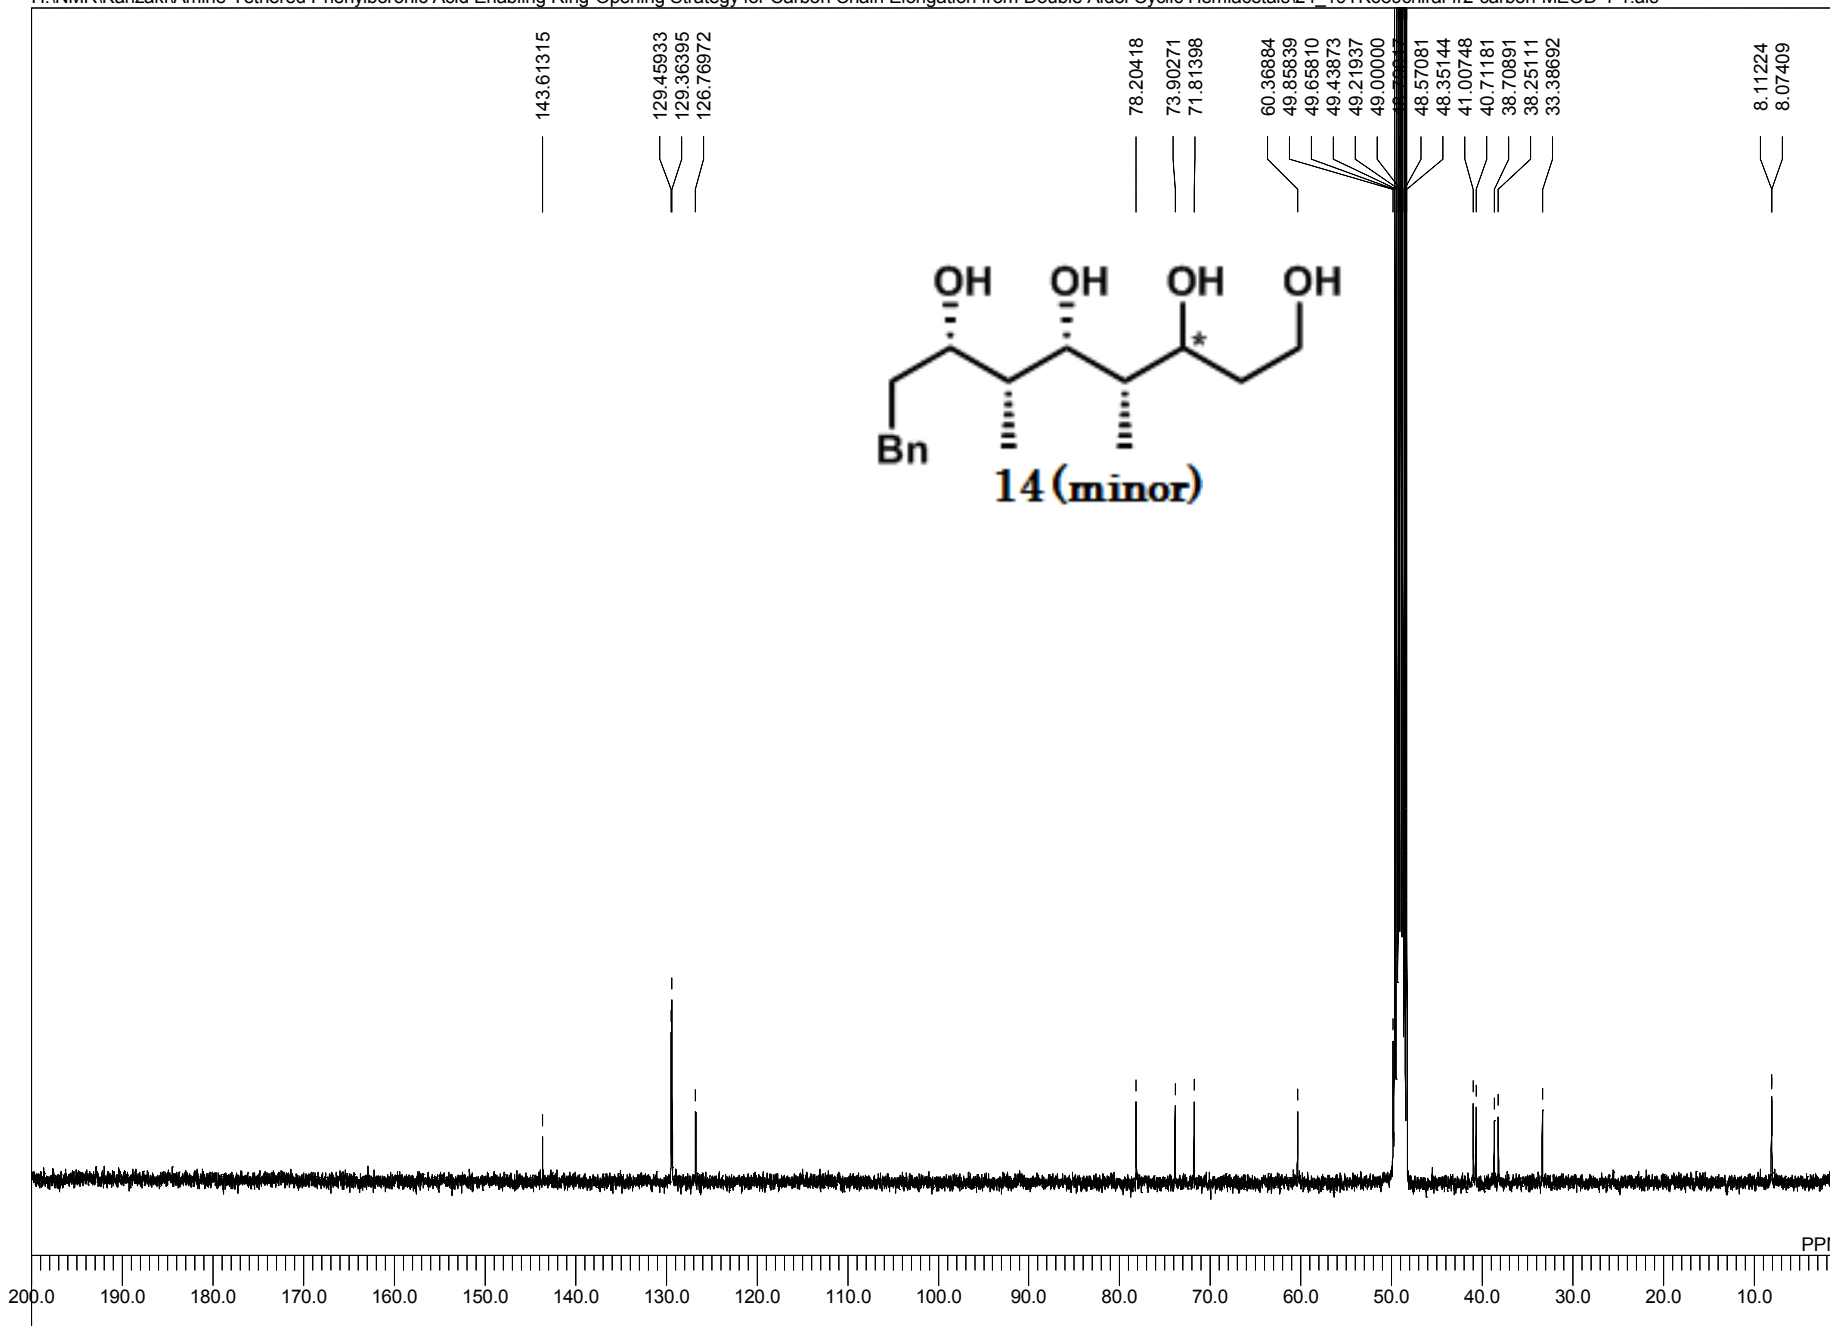

Supplement: c9ob01263j1.pdf [file c9ob01263j1.pdf]
